# Supplementary material for: Recurrent TB: a systematic review and meta-analysis of the incidence rates and the proportions of relapses and reinfections
Source: HighWire-hosted journal article supplement (doi:10.1136/thoraxjnl-2020-215449), 2021-02-05
Supplement: thoraxjnl-2020-215449supp001_data_supplement.pdf [file thoraxjnl-2020-215449supp001_data_supplement.pdf]

**Supplementary material**

**Title:** Recurrent tuberculosis: a systematic review and meta-analysis of the incidence rates and the proportions of relapse and reinfection

Vega V (1), Rodríguez S (1), Van der Stuyft P (2), Seas C (1,3), Otero L (1,3).

|                                                                                                                                        |    |
|----------------------------------------------------------------------------------------------------------------------------------------|----|
| <b>Appendix 1 Search strategy</b>                                                                                                      | 2  |
| <b>Appendix 2 Modified New Castle Ottawa Scale for risk of bias in cohort studies</b>                                                  | 3  |
| <b>Appendix 3 Calculation of person-years at risk of recurrent TB</b>                                                                  | 7  |
| <b>Appendix 4 PRISMA checklist</b>                                                                                                     | 8  |
| <b>Appendix 5 Characteristics of included studies.</b>                                                                                 | 12 |
| <b>Appendix 6 Individual data of included studies</b>                                                                                  |    |
| Table S1 Individual outcomes of cohort studies and clinical trials included in the review and calculation of person years of follow up | 24 |
| Table S2 Proportion of relapses and reinfections in cohort studies and clinical trials                                                 | 29 |
| <b>Appendix 7 Quality Assessment</b>                                                                                                   |    |
| Table S3 Recurrent TB incidence rate: Quality Assessment according modified NewCastle Ottawa Scale                                     | 32 |
| Table S4 Proportion of reinfections and relapses: Quality Assessment according modified NewCastle Ottawa Scale                         | 39 |
| <b>Appendix 8 Supplementary figures</b>                                                                                                |    |
| Figure S1 Recurrent TB incidence rate by background TB incidence                                                                       | 42 |
| Figure S2 Recurrent TB incidence rate by type of follow up                                                                             | 43 |
| Figure S3 Forest plot of the recurrent TB incidence rate by study design                                                               | 44 |
| Figure S4 Forest plot of the recurrent TB incidence rate by TB drug regimen                                                            | 45 |
| Figure S5 Forest plot of the recurrent TB incidence rate by background HIV prevalence level                                            | 46 |
| Figure S6 Forest plot of the recurrent TB incidence rate by study sample size                                                          | 47 |
| Figure S7 Forest plot of the recurrent TB incidence rate by study quality                                                              | 48 |
| Figure S8 Forest plot of the recurrent TB incidence rate by planned follow-up                                                          | 49 |
| Figure S9 Funnel plot, recurrent TB incidence rate                                                                                     | 50 |
| Figure S10 Forest plot of the proportion of reinfections among recurrent TB episodes by background TB incidence                        | 51 |
| Figure S11 Forest plot of the proportion of reinfections among recurrent TB episodes by background HIV prevalence level                | 52 |
| Figure S12 Forest plot of the proportion of reinfections among recurrent TB episodes by study design                                   | 53 |
| Figure S13 Forest plot of the proportion of reinfections among recurrent TB episodes by length of follow-up                            | 54 |
| Figure S14 Forest plot of the proportion of reinfections among recurrent TB episodes by DNA fingerprinting availability                | 55 |
| Figure S15 Forest plot of the proportion of reinfections among recurrent TB episodes by molecular method used                          | 56 |
| Figure S16 Forest plot of the proportion of reinfections among recurrent TB episodes by study sample size                              | 57 |
| Figure S17 Forest plot of the proportion of reinfections among recurrent TB episodes by study quality                                  | 58 |
| Figure S18 Funnel plot, proportion of reinfections                                                                                     | 59 |
| <b>Appendix 9 References of included studies</b>                                                                                       | 60 |

## Appendix 1 Search strategy

### Search strategy PUBMED

```

((((((((("tuberculosis"[MeSH Terms]) OR "tuberculosis"[Title/Abstract])) AND
(((("recurrence"[MeSH Terms]) OR recurren*[Tite/Abstract])) OR
(((reinfection*[Title/Abstract]) OR relapse*[Title/Abstract])) OR
"reactivation*[Title/Abstract]))) NOT (((("addresses"[Publication Type] OR
"autobiography"[Publication Type] OR "bibliography"[Publication Type] OR
"book illustrations"[Publication Type] OR "case reports"[Publication Type] OR
"comment"[Publication Type] OR "dictionary"[Publication Type] OR
"directory"[Publication Type] OR "editorial"[Publication Type] OR "electronic
supplementary materials"[Publication Type] OR "ephemera"[Publication Type] OR
"expression of concern"[Publication Type] OR "festschrift"[Publication Type] OR
"government publications"[Publication Type] OR "guideline"[Publication Type] OR
"interactive tutorial"[Publication Type] OR "interview"[Publication Type] OR
"lectures"[Publication Type] OR "legal cases"[Publication Type] OR
"legislation"[Publication Type] OR "letter"[Publication Type] OR
"news"[Publication Type] OR "newspaper article"[Publication Type] OR "patient
education handout"[Publication Type] OR "periodical index"[Publication Type] OR
"personal narratives"[Publication Type] OR "pictorial works"[Publication Type] OR
"popular works"[Publication Type] OR "portraits"[Publication Type] OR "practice
guideline"[Publication Type] OR "technical report"[Publication Type] OR OR
"video audio media"[Publication Type] OR "webcasts"[Publication Type]))) NOT

```

Animals[Mesh:noexp])

Filters: Publication date from 1980/01/01; English; Spanish; French

### Cochrane Library

```

"tuberculosis":ti,ab,kw AND "recurrence":ti,ab,kw or "relapse":ti,ab,kw or
"reinfection":ti,ab,kw or "reactivation":ti,ab,kw

```

Filters: Publication date from 1980/01/01

### Scielo

```

(ti:(tuberculosis) OR ab:(tuberculosis)) AND ((ti:(recurren$)or ab:(recurren$)) OR
(ti:(reinfeción)or ab:(reinfeción)) OR (ab:(recaída) OR ti:(recaída)) OR
(ti:(reactivación)or ab:(reactivación))

```

### Lilacs

```

(tw:((tw:((tw:("tuberculosis")) AND (tw:(reinfeción)) OR (tw:(recurren*)) OR
(tw:(reactivación)) OR (tw:(recaída)) AND ( db:("LILACS")))))) NOT
(type_of_study:("case_reports")) AND (instance:"regional") AND ( la:("es" OR "en"))

```

## Appendix 2: Modified New Castle Ottawa Scale for risk of bias

## First outcome: Incidence rate of recurrent TB

|           | Original scale                                                                                                                                                                                                         | Modified scale                                                                                                                                                                                                                                                                                                                                                                                          | Rationale for changes                                                                                                                                                                                                                                                                                                   |
|-----------|------------------------------------------------------------------------------------------------------------------------------------------------------------------------------------------------------------------------|---------------------------------------------------------------------------------------------------------------------------------------------------------------------------------------------------------------------------------------------------------------------------------------------------------------------------------------------------------------------------------------------------------|-------------------------------------------------------------------------------------------------------------------------------------------------------------------------------------------------------------------------------------------------------------------------------------------------------------------------|
| Selection |                                                                                                                                                                                                                        |                                                                                                                                                                                                                                                                                                                                                                                                         |                                                                                                                                                                                                                                                                                                                         |
| 1         | Representativeness of the exposed cohort<br>A. Truly representative ( <b>one star</b> )<br>B. Somewhat representative ( <b>one star</b> )<br>C. Selected group<br>D. No description of the derivation of the cohort    | Representativeness of the <b>successfully treated</b> TB patient population<br>A. Truly representative General population ( <b>one star</b> )<br>B. Somewhat representative Population at probable higher risk of TB (ex. low socio-economic status, miners) ( <b>one star</b> )<br>C. Selected group (ex. only diabetic or HIV positive patients)<br>D. No description of the derivation of the cohort | Our study question - the rate of recurrent TB- requires a representative population of persons who were successfully treated (either completing TB treatment or cured) and are at risk of relapse or reinfection. Selected populations are those at higher risk of reinfection or relapse, than the general population. |
| 2         | Selection of the non-exposed cohort<br>A. Drawn from the same community as the exposed cohort ( <b>one star</b> )<br>B. Drawn from a different source<br>C. No description of the derivation of the non-exposed cohort | Not applicable as our research question does not include a comparison group.                                                                                                                                                                                                                                                                                                                            |                                                                                                                                                                                                                                                                                                                         |
| 3         | Ascertainment of exposure<br>A. Secure record (e.g., surgical record) ( <b>one star</b> )<br>B. Structured interview ( <b>one star</b> )<br>C. Written self-report<br>D. No description<br>E. Other                    | Ascertainment of cure<br>A. Confirmed record of cure (smear negative at month 5) ( <b>one star</b> )<br>B. Confirmed record of treatment completion (the full regimen was completed)<br>C. Unclear record of cure or treatment completion                                                                                                                                                               | We consider as "exposure", "to be at risk of TB after a TB episode that has been cured or successfully treated". We downgrade the quality for "successfully treated" as patients in this category may not have been cured, and subsequent active TB may actually be a late treatment failure, not a true relapse.       |

|               |                                                                                                                                                                                                                                                                                                                                                 |                                                                                                                                                                                                                                                                                                                                               |                                                                                                                                                                                                                                                                                          |
|---------------|-------------------------------------------------------------------------------------------------------------------------------------------------------------------------------------------------------------------------------------------------------------------------------------------------------------------------------------------------|-----------------------------------------------------------------------------------------------------------------------------------------------------------------------------------------------------------------------------------------------------------------------------------------------------------------------------------------------|------------------------------------------------------------------------------------------------------------------------------------------------------------------------------------------------------------------------------------------------------------------------------------------|
| 4             | Demonstration that outcome of interest was not present at start of study<br>A. Yes ( <b>one star</b> )<br>B. No                                                                                                                                                                                                                                 | Redundant with item 3; not included                                                                                                                                                                                                                                                                                                           |                                                                                                                                                                                                                                                                                          |
| Comparability |                                                                                                                                                                                                                                                                                                                                                 |                                                                                                                                                                                                                                                                                                                                               |                                                                                                                                                                                                                                                                                          |
| 1             | A. Comparability of cohorts on the basis of the design or analysis controlled for confounders<br>B. The study controls for age, sex and marital status ( <b>one star</b> )<br>C. Study controls for other factors (list) ( <b>one star</b> )<br>D. Cohorts are not comparable on the basis of the design or analysis controlled for confounders | Not applicable; not included                                                                                                                                                                                                                                                                                                                  |                                                                                                                                                                                                                                                                                          |
| Outcome       |                                                                                                                                                                                                                                                                                                                                                 |                                                                                                                                                                                                                                                                                                                                               |                                                                                                                                                                                                                                                                                          |
| 1             | Assessment of outcome<br>A. Independent blind assessment ( <b>one star</b> )<br>B. Record linkage ( <b>one star</b> )<br>C. Self-report<br>D. No description<br>E. Other                                                                                                                                                                        | Assessment of recurrent episodes<br>A. The recurrent TB episode was defined in the methods as bacteriologically confirmed ( <b>one star</b> )<br>B. The recurrent TB episode was defined in the methods as bacteriological confirmed or clinical-radiological diagnosis<br>C. The recurrent TB episode was self-reported<br>D. No description | When the recurrent TB episode is bacteriologically confirmed, we can be confident the disease is active TB. Clinical radiological TB diagnoses are less accurate given possible post-TB lung conditions or physicians' inclination to re diagnose TB in case of recurrent chest symptoms |
| 2             | Was follow-up long enough for outcomes to occur<br>A. Yes ( <b>one star</b> )<br>B. No Indicate the median duration of follow-up and a brief rationale for the assessment above: _____                                                                                                                                                          | Was follow-up long enough for outcomes to occur<br>A. Yes $\geq 2$ years ( <b>one star</b> )<br>B. No, $< 2$ years                                                                                                                                                                                                                            | We propose two years as the cutoff considering it covers the high risk period for relapse and allows sufficient time for reinfections to occur.                                                                                                                                          |

|       |                                                                                                                                                                                                                                                                                                                                                                                                                     |                                                                                                                                                                                                                              |                                                      |
|-------|---------------------------------------------------------------------------------------------------------------------------------------------------------------------------------------------------------------------------------------------------------------------------------------------------------------------------------------------------------------------------------------------------------------------|------------------------------------------------------------------------------------------------------------------------------------------------------------------------------------------------------------------------------|------------------------------------------------------|
| 3     | <p>Adequacy of follow-up of cohorts</p> <p>A. Complete follow-up- all subject accounted for (<b>one star</b>)</p> <p>B. Subjects lost to follow-up unlikely to introduce bias- number lost less than or equal to 20% or description of those lost suggested no different from those followed. (<b>one star</b>)</p> <p>C. Follow-up rate less than 80% and no description of those lost</p> <p>D. No statement</p>  | No change for this item.                                                                                                                                                                                                     |                                                      |
| Scale |                                                                                                                                                                                                                                                                                                                                                                                                                     |                                                                                                                                                                                                                              |                                                      |
|       | <p>Good quality: 3 or 4 stars in selection domain AND 1 or 2 stars in comparability domain AND 2 or 3 stars in outcome/exposure domain</p> <p>Fair quality: 2 stars in selection domain AND 1 or 2 stars in comparability domain AND 2 or 3 stars in outcome/exposure domain</p> <p>Poor quality: 0 or 1 star in selection domain OR 0 stars in comparability domain OR 0 or 1 stars in outcome/exposure domain</p> | <p>Good quality: 2 stars in selection domain AND 3 in outcome domain</p> <p>Fair quality: 1 star in selection domain OR 2 in outcome domain</p> <p>Poor quality: If 0 stars in selection domain OR 0-1 in outcome domain</p> | We adapted the scale in line with the modifications. |

## Second outcome: Proportion of reinfections and relapses

|           | Original scale                                                                                                                                                                                                         | Modified scale                                                                                                                                                                                                                                                                                                                                                                         | Rationale for changes          |
|-----------|------------------------------------------------------------------------------------------------------------------------------------------------------------------------------------------------------------------------|----------------------------------------------------------------------------------------------------------------------------------------------------------------------------------------------------------------------------------------------------------------------------------------------------------------------------------------------------------------------------------------|--------------------------------|
| Selection |                                                                                                                                                                                                                        |                                                                                                                                                                                                                                                                                                                                                                                        |                                |
| 1         | Representativeness of the exposed cohort<br>A. Truly representative ( <b>one star</b> )<br>B. Somewhat representative ( <b>one star</b> )<br>C. Selected group<br>D. No description of the derivation of the cohort    | Representativeness of the <b>successfully treated</b> TB patient population<br>A. Truly representative: General population ( <b>one star</b> )<br>B. Somewhat representative: Population at probable higher risk of TB (ex. By socio-economical status, miners) ( <b>one star</b> )<br>C. Selected group (ex. only diabetic, HIV)<br>D. No description of the derivation of the cohort | Same as for the first outcome. |
| 2         | Selection of the non-exposed cohort<br>A. Drawn from the same community as the exposed cohort ( <b>one star</b> )<br>B. Drawn from a different source<br>C. No description of the derivation of the non-exposed cohort | Not applicable; not included                                                                                                                                                                                                                                                                                                                                                           |                                |
| 3         | Ascertainment of exposure<br>A. Secure record (e.g., surgical record) ( <b>one star</b> )<br>B. Structured interview ( <b>one star</b> )<br>C. Written self-report<br>D. No description<br>E. Other                    | Ascertainment of cure<br>A. Confirmed record of cure (smear negative at month 5) ( <b>one star</b> )<br>B. Confirmed record of treatment completion (the full regimen was completed)<br>C. Unclear record of cure or treatment completion                                                                                                                                              | Same as for the first outcome  |
| 4         | Demonstration that outcome of interest was not present at start of study<br>A. Yes ( <b>one star</b> )                                                                                                                 | Redundant; not included                                                                                                                                                                                                                                                                                                                                                                |                                |

|               |                                                                                                                                                                                                                                                                                                                                                             |                                                                                                                                                                                                                                                                                                                                                                                           |                                                                                                                                                                                                                                                             |
|---------------|-------------------------------------------------------------------------------------------------------------------------------------------------------------------------------------------------------------------------------------------------------------------------------------------------------------------------------------------------------------|-------------------------------------------------------------------------------------------------------------------------------------------------------------------------------------------------------------------------------------------------------------------------------------------------------------------------------------------------------------------------------------------|-------------------------------------------------------------------------------------------------------------------------------------------------------------------------------------------------------------------------------------------------------------|
|               | B. No                                                                                                                                                                                                                                                                                                                                                       |                                                                                                                                                                                                                                                                                                                                                                                           |                                                                                                                                                                                                                                                             |
| Comparability |                                                                                                                                                                                                                                                                                                                                                             |                                                                                                                                                                                                                                                                                                                                                                                           |                                                                                                                                                                                                                                                             |
| 1             | <p>Comparability of cohorts on the basis of the design or analysis controlled for confounders</p> <p>A. The study controls for age, sex and marital status (<b>one star</b>)</p> <p>B. Study controls for other factors (list) (<b>one star</b>)</p> <p>C. Cohorts are not comparable on the basis of the design or analysis controlled for confounders</p> | Not applicable; not included                                                                                                                                                                                                                                                                                                                                                              |                                                                                                                                                                                                                                                             |
| Outcome       |                                                                                                                                                                                                                                                                                                                                                             |                                                                                                                                                                                                                                                                                                                                                                                           |                                                                                                                                                                                                                                                             |
| 1             | <p>Assessment of outcome</p> <p>A. Independent blind assessment (<b>one star</b>)</p> <p>B. Record linkage (<b>one star</b>) Self report</p> <p>C. No description</p> <p>D. Other</p>                                                                                                                                                                       | <p>Assessment of outcome</p> <p>A. The study use high discriminatory genotyping methods (WGS or MIRU - VNTR) (<b>one star</b>)</p> <p>B. The study combines more than 1 method for differentiating relapses and reinfections (<b>one star</b>)</p> <p>C. The study uses only one not high discriminatory method for differentiating relapses and reinfections (spoligotyping or RFLP)</p> | <p>The type of test used to discriminate reinfections from relapses is a key item for this outcome.</p> <p>Studies using high discriminatory methods will be less biased. However, the combination of tests can also provide high discriminatory power.</p> |

|       |                                                                                                                                                                                                                                                                                                                                                                                                                     |                                                                                                                                                                                           |                                                                                                                                                                                                                                                                                             |
|-------|---------------------------------------------------------------------------------------------------------------------------------------------------------------------------------------------------------------------------------------------------------------------------------------------------------------------------------------------------------------------------------------------------------------------|-------------------------------------------------------------------------------------------------------------------------------------------------------------------------------------------|---------------------------------------------------------------------------------------------------------------------------------------------------------------------------------------------------------------------------------------------------------------------------------------------|
| 2     | <p>Was follow-up long enough for outcomes to occur?</p> <p>A. Yes (<b>one star</b>)<br/> B. No Indicate the median duration of follow-up and a brief rationale for the assessment above: _____</p>                                                                                                                                                                                                                  | <p>Was follow-up long enough for outcomes to occur?</p> <p>A. Yes <math>\geq</math> 2 years (<b>one star</b>)<br/> B. No, &lt; 2 years</p>                                                | <p>Same as for the first outcome.</p>                                                                                                                                                                                                                                                       |
| 3     | <p>Adequacy of follow-up of cohorts</p> <p>A. Complete follow-up- all subject accounted for (<b>one star</b>)<br/> B. Subjects lost to follow-up unlikely to introduce bias- number lost less than or equal to 20% or description of those lost suggested no different from those followed. (<b>one star</b>)<br/> C. Follow-up rate less than 80% and no description of those lost<br/> D. No statement</p>        | <p>% availability of DNA fingerprinting for classifying recurrent episodes as relapse or reinfection</p> <p>A. <math>&gt;88\%</math> (<b>one star</b>)<br/> B. <math>\leq 88\%</math></p> | <p>We considered completeness of availability of DNA fingerprinting to be a key item for estimates of proportion of reinfections and relapses to be accurate.</p> <p>We established the cut-off point to separate the upper from the 2 lower tertiles of % fingerprinting availability.</p> |
| Score |                                                                                                                                                                                                                                                                                                                                                                                                                     |                                                                                                                                                                                           |                                                                                                                                                                                                                                                                                             |
|       | <p>Good quality: 3 or 4 stars in selection domain AND 1 or 2 stars in comparability domain AND 2 or 3 stars in outcome/exposure domain</p> <p>Fair quality: 2 stars in selection domain AND 1 or 2 stars in comparability domain AND 2 or 3 stars in outcome/exposure domain</p> <p>Poor quality: 0 or 1 star in selection domain OR 0 stars in comparability domain OR 0 or 1 stars in outcome/exposure domain</p> | <p>Good quality: 2 stars in selection AND 3 in outcome</p> <p>Fair quality: 1 star in selection OR 2 in outcome</p> <p>Poor quality: 0 stars in selection OR 0-1 in outcome</p>           | <p>Same as for the first outcome.</p>                                                                                                                                                                                                                                                       |



## Appendix 3 Calculation of person-years at risk of recurrent TB

| Formula | Data available                                                        | Total person-years at risk of recurrent TB                                                                                                                                                                                                                 |
|---------|-----------------------------------------------------------------------|------------------------------------------------------------------------------------------------------------------------------------------------------------------------------------------------------------------------------------------------------------|
| F1      | If incidence rate or Person-Years at risk available                   | Extracted as reported                                                                                                                                                                                                                                      |
| F2      | If mean follow-up duration for all patients was provided              | $\# \text{Successfully treated patients} \times \text{Mean follow up duration (years)}$                                                                                                                                                                    |
| F3      | if the mean follow up time is provided only for the patients not lost | $(\# \text{Patients not lost} \times \text{Mean follow up duration (years)}) + 0.5 (\text{Planned follow up duration (years)} \times \# \text{Patients lost})$                                                                                             |
| F4      | If mean time to recurrence was provided:                              | $(\# \text{Recurrent patients} \times \text{Mean time to recurrence (years)}) + 0.5 (\text{Planned follow up duration (years)} \times \# \text{Patients lost}) + (\text{Planned follow up duration (years)} \times \# \text{Patients without recurrence})$ |
| F5      | If all the above was not possible                                     | $(\# \text{Patients successfully treated} - 0.5 \times (\# \text{Patients with recurrence} + \# \text{Patients lost})) \times (\text{Planned follow up duration (years)})$                                                                                 |

## Appendix 4 PRISMA Checklist

| Section/topic             | # | Checklist item                                                                                                                                                                                                                                                                                              | Reported on page # |
|---------------------------|---|-------------------------------------------------------------------------------------------------------------------------------------------------------------------------------------------------------------------------------------------------------------------------------------------------------------|--------------------|
| <b>TITLE</b>              |   |                                                                                                                                                                                                                                                                                                             |                    |
| Title                     | 1 | Identify the report as a systematic review, meta-analysis, or both.                                                                                                                                                                                                                                         | 1                  |
| <b>ABSTRACT</b>           |   |                                                                                                                                                                                                                                                                                                             |                    |
| Structured summary        | 2 | Provide a structured summary including, as applicable: background; objectives; data sources; study eligibility criteria, participants, and interventions; study appraisal and synthesis methods; results; limitations; conclusions and implications of key findings; systematic review registration number. | 2                  |
| <b>INTRODUCTION</b>       |   |                                                                                                                                                                                                                                                                                                             |                    |
| Rationale                 | 3 | Describe the rationale for the review in the context of what is already known.                                                                                                                                                                                                                              | 3                  |
| Objectives                | 4 | Provide an explicit statement of questions being addressed with reference to participants, interventions, comparisons, outcomes, and study design (PICOS).                                                                                                                                                  | 3                  |
| <b>METHODS</b>            |   |                                                                                                                                                                                                                                                                                                             |                    |
| Protocol and registration | 5 | Indicate if a review protocol exists, if and where it can be accessed (e.g., Web address), and, if available, provide registration information including registration number.                                                                                                                               | 3                  |
| Eligibility criteria      | 6 | Specify study characteristics (e.g., PICOS, length of follow-up) and report characteristics (e.g., years considered, language, publication status) used as criteria for eligibility, giving rationale.                                                                                                      | 3                  |

|                                    |    |                                                                                                                                                                                                                        |            |
|------------------------------------|----|------------------------------------------------------------------------------------------------------------------------------------------------------------------------------------------------------------------------|------------|
| Information sources                | 7  | Describe all information sources (e.g., databases with dates of coverage, contact with study authors to identify additional studies) in the search and date last searched.                                             | 3          |
| Search                             | 8  | Present full electronic search strategy for at least one database, including any limits used, such that it could be repeated.                                                                                          | Appendix 6 |
| Study selection                    | 9  | State the process for selecting studies (i.e., screening, eligibility, included in systematic review, and, if applicable, included in the meta-analysis).                                                              | 4          |
| Data collection process            | 10 | Describe method of data extraction from reports (e.g., piloted forms, independently, in duplicate) and any processes for obtaining and confirming data from investigators.                                             | 4          |
| Data items                         | 11 | List and define all variables for which data were sought (e.g., PICOS, funding sources) and any assumptions and simplifications made.                                                                                  | 4          |
| Risk of bias in individual studies | 12 | Describe methods used for assessing risk of bias of individual studies (including specification of whether this was done at the study or outcome level), and how this information is to be used in any data synthesis. | 4          |
| Summary measures                   | 13 | State the principal summary measures (e.g., risk ratio, difference in means).                                                                                                                                          | 4          |
| Synthesis of results               | 14 | Describe the methods of handling data and combining results of studies, if done, including measures of consistency (e.g., $I^2$ ) for each meta-analysis.                                                              | 4-5        |
| Risk of bias across studies        | 15 | Specify any assessment of risk of bias that may affect the cumulative evidence (e.g., publication bias, selective reporting within studies).                                                                           | 4-5        |
| Additional analyses                | 16 | Describe methods of additional analyses (e.g., sensitivity or subgroup analyses, meta-regression), if done, indicating which were pre-specified.                                                                       | 4-5        |

| <b>RESULTS</b>                |    |                                                                                                                                                                                                          |                    |
|-------------------------------|----|----------------------------------------------------------------------------------------------------------------------------------------------------------------------------------------------------------|--------------------|
| Study selection               | 17 | Give numbers of studies screened, assessed for eligibility, and included in the review, with reasons for exclusions at each stage, ideally with a flow diagram.                                          | 5-6<br>Figure 1    |
| Study characteristics         | 18 | For each study, present characteristics for which data were extracted (e.g., study size, PICOS, follow-up period) and provide the citations.                                                             | 5-6                |
| Risk of bias within studies   | 19 | Present data on risk of bias of each study and, if available, any outcome level assessment                                                                                                               | 6-7<br>Appendix 3  |
| Results of individual studies | 20 | For all outcomes considered (benefits or harms), present, for each study: (a) simple summary data for each intervention group (b) effect estimates and confidence intervals, ideally with a forest plot. | Appendix 1         |
| Synthesis of results          | 21 | Present results of each meta-analysis done, including confidence intervals and measures of consistency.                                                                                                  | Table 2<br>Table 4 |
| Risk of bias across studies   | 22 | Present results of any assessment of risk of bias across studies.                                                                                                                                        | Figure             |
| Additional analysis           | 23 | Give results of additional analyses, if done (e.g., sensitivity or subgroup analyses, meta-regression [see Item 16]).                                                                                    | Table 2            |
| <b>DISCUSSION</b>             |    |                                                                                                                                                                                                          |                    |
| Summary of evidence           | 24 | Summarize the main findings including the strength of evidence for each main outcome; consider their relevance to key groups (e.g., healthcare providers, users, and policy makers).                     | 7-8                |

|                |    |                                                                                                                                                               |     |
|----------------|----|---------------------------------------------------------------------------------------------------------------------------------------------------------------|-----|
| Limitations    | 25 | Discuss limitations at study and outcome level (e.g., risk of bias), and at review-level (e.g., incomplete retrieval of identified research, reporting bias). | 9   |
| Conclusions    | 26 | Provide a general interpretation of the results in the context of other evidence, and implications for future research.                                       | 10  |
| <b>FUNDING</b> |    |                                                                                                                                                               |     |
| Funding        | 27 | Describe sources of funding for the systematic review and other support (e.g., supply of data); role of funders for the systematic review.                    | 17a |

## Appendix 5 Characteristics of included studies.

| Authors                              | Study setting                              | Study population        | Type of follow-up | Treatment regimen *                                                                                                                                                                                                                                | TB treatment delivery              |
|--------------------------------------|--------------------------------------------|-------------------------|-------------------|----------------------------------------------------------------------------------------------------------------------------------------------------------------------------------------------------------------------------------------------------|------------------------------------|
| Clinical trials                      |                                            |                         |                   |                                                                                                                                                                                                                                                    |                                    |
| Aung et al (2012)                    | Bangladesh                                 | General population      | Passive           | (2-3)HRZE/4H <sub>3</sub> R <sub>3</sub>                                                                                                                                                                                                           | Health facility DOTS               |
| Balasubramaniam et al (1990)         | Madras, India                              | General population      | Active            | 3SRHZ, 3SRHZ/2HZ, 3SHZ/2HZ                                                                                                                                                                                                                         | Health facility DOTS               |
| Castelo et al (1989)                 | Sao Paulo, Brazil                          | General population      | Active            | 2HRZ then, randomly allocated to: 4HR or 4H <sub>3</sub> R <sub>2</sub>                                                                                                                                                                            | Self administered treatment        |
| Chaulet et al (1995)                 | Algeria                                    | General population      | Active            | Group S: 2HRZ 4HRZ<br>Group C: 6HRZ                                                                                                                                                                                                                | Health facility DOTS               |
| Cohn et al (1990)                    | Denver, US                                 | General population      | Not specified     | 2HRZS/6HR                                                                                                                                                                                                                                          | Health facility DOTS               |
| Conradie et al (2020)                | South Africa                               | XDR-TB                  | Non specified     | (26weeks) BdqPtoLzd                                                                                                                                                                                                                                | Health facility DOTS               |
| East African/BMRC (1980)             | East Africa and Zambia                     | General population      | Active            | For 6 or 8 months<br>2SHRZ/TH, 1SHRZ/TH, 1SHRZ/S2H2Z2<br>2SHR/TH-t                                                                                                                                                                                 | Health facility DOTS               |
| East African/BMRC (1981)             | East Africa and Zambia                     | General population      | Active            | 2SHRZ/(9w)HRZ, 2SHRZ/(9w)HR,<br>2SHRZ/(9w)HZ, 2SHRZ/(9w)H,SHRZ/(9w)H                                                                                                                                                                               | Health facility DOTS               |
| East and Central African/BMRC (1986) | Kenia, Zambia, Tanzania, Uganda            | General population      | Active            | 2SHRZ/4HR - 2SHRZ/4HZ - 2SHRZ/4H -<br>2SHRZ/6H                                                                                                                                                                                                     | Health facility DOTS               |
| El-Sadr et al (1998)                 | New York, US                               | HIV-1 infected patients | Active            | Induction :2HRZE o 2HRZELfx<br>Continuation: 4HR or 7HR                                                                                                                                                                                            | Health facility DOTS               |
| Fitzgerald et al (2000)              | Port au Prince, Haiti                      | General population      | Passive           | 6 month therapy Initiation phase: HRZ and continuation phase (H <sub>2</sub> R <sub>2</sub> ).                                                                                                                                                     | Not specified                      |
| Gengiah et al (2014)                 | South Africa                               | HIV-1 infected patients | Not specified     | 2HRZE4/HR in FDC                                                                                                                                                                                                                                   | Health facility DOTS               |
| Gonzalez-Montaner et al (1994)       | Argentina, Brazil and Thailand             | General population      | Not specified     | 2HRZE/2HR Rifampicin or rifabutin                                                                                                                                                                                                                  | Health facility DOTS               |
| Gopalan et al (2018)                 | Chennai, Vellore, and Madurai, south India | HIV-1 infected patients | Active            | (1) 2EHRZ <sub>7</sub> /4HR <sub>7</sub> ; (2) 2EHRZ <sub>7</sub> /4HR <sub>3</sub> ; and (3)<br>2EHRZ <sub>3</sub> /4HR <sub>3</sub>                                                                                                              | Self administered treatment / DOTS |
| Hong et al (1988)                    | Seoul, Korea                               | retreatment             | Active            | (1) 12RE (2) 12R <sub>3</sub> E <sub>3</sub> (3) 3R <sub>3</sub> E <sub>3</sub> Z <sub>3</sub> /9R <sub>3</sub> E <sub>3</sub> Z <sub>3</sub> S <sub>3</sub><br>(4)3H <sub>3</sub> R <sub>3</sub> Pto <sub>3</sub> /9R <sub>3</sub> E <sub>3</sub> | Health facility DOTS               |
| Hong Kong Chest Service (1982)       | Hong Kong                                  | General population      | Active            | 6HRSZE3 / 6HRSZ3 / 6HRSE3 / 6HRZE3 /<br>6HRZE7                                                                                                                                                                                                     | Health facility DOTS               |

|                                     |                                                                                        |                    |               |                                                                                                                                                                                                                                                                                                                                     |                                     |
|-------------------------------------|----------------------------------------------------------------------------------------|--------------------|---------------|-------------------------------------------------------------------------------------------------------------------------------------------------------------------------------------------------------------------------------------------------------------------------------------------------------------------------------------|-------------------------------------|
| Hong Kong Chest Service/BMRC (1991) | Hong Kong                                                                              | General population | Not specified | 2HRSZ/2HRS/2HR , 4HSZ/2HR, 4HRSZ/2HRZ , 6HRZ. Later part of intake, combined vs separate formulation.                                                                                                                                                                                                                               | Health facility DOTS                |
| Jasmer Lorna et al (2004)           | United States and Canada                                                               | General population | Active        | Rifampin based treatment for 6 months                                                                                                                                                                                                                                                                                               | Not specified                       |
| Jawahar et al (2013)                | Chennai and Madurai, South India                                                       | General population | Active        | 2 G <sub>3</sub> H <sub>3</sub> R <sub>3</sub> Z <sub>3</sub> / 2 G <sub>3</sub> H <sub>3</sub> R <sub>3</sub><br>2 M <sub>3</sub> H <sub>3</sub> R <sub>3</sub> Z <sub>3</sub> / 2 M <sub>3</sub> H <sub>3</sub> R <sub>3</sub><br>2 E <sub>3</sub> H <sub>3</sub> R <sub>3</sub> Z <sub>3</sub> / 4 H <sub>3</sub> R <sub>3</sub> | Health facility DOTS                |
| Johnson et al (2000)                | Kampala Uganda                                                                         | General population | Active        | 2HREZ/6HR                                                                                                                                                                                                                                                                                                                           | Not supervised ambulatory treatment |
| Johnson et al (2003)                | Kampala Uganda                                                                         | General population | Active        | 2HRZE/4HR + Interleukin-2                                                                                                                                                                                                                                                                                                           | Not specified                       |
| Johnson et al (2009)                | Kampala, Uganda; Vitória, Brazil; Makati City, Philippines.                            | General population | Active        | 2HRZE/2HR - 2HRZE/4HR                                                                                                                                                                                                                                                                                                               | Health facility DOTS                |
| Kennedy et al (1996)                | Kilimanjaro, Tanzania                                                                  | General population | Active        | 4HRCiprofloxacin/2HR<br>2HRZE/2HRZ/2HR                                                                                                                                                                                                                                                                                              | Health facility DOTS                |
| Kenyan/Zambian/BMRC (1989)          | Kenia-Zambia                                                                           | General population | Not specified | 2SHRZ/4TH + Levamisole                                                                                                                                                                                                                                                                                                              | Self administered treatment / DOTS  |
| Kohno et al (1992)                  | Nagasaki                                                                               | General population | Active        | 9 months of daily ofloxacin (2 possible doses) or E plusR and H.                                                                                                                                                                                                                                                                    | Health facility DOTS                |
| Lee et al (2012)                    | Seoul, South Korea                                                                     | XDR                | Active        | Linezolid therapy that started immediately or after 2 months, at a dose of 600 mg per day, without a change in their background regimen.                                                                                                                                                                                            | Health facility DOTS                |
| Madras/BMRC (1989)                  | Hong Kong                                                                              | Smear negative     | Not specified | Culture positive: 4SHRZ or 4S <sub>3</sub> H <sub>3</sub> R <sub>3</sub> Z <sub>3</sub> or 6S <sub>3</sub> H <sub>3</sub> R <sub>3</sub> Z <sub>3</sub> . Cultures negative 3SHRZ or 3S <sub>3</sub> H <sub>3</sub> R <sub>3</sub> Z <sub>3</sub> or 4S <sub>3</sub> H <sub>3</sub> R <sub>3</sub> Z <sub>3</sub> .                 | Health facility DOTS                |
| Maug et al (2020)                   | Bangladesh                                                                             | Smear positive     | Active        | 2EHRZ/4HR y dosis doble Rifampin<br>2EHRZ/4HR                                                                                                                                                                                                                                                                                       | Health facility DOTS                |
| Merle et al (2014)                  | Cotonou, Benin; Conakry, Guinea; Nairobi, Kenya; Dakar, Senegal; Durban, South Africa. | General population | Active        | Control: 2HRZE 4HR<br>Experimental: 2HRZG 2HRG                                                                                                                                                                                                                                                                                      | Not specified                       |
| Mohanty et al (1993)                | India                                                                                  | General population | Not specified | 2SHRZ/4HR , 2SHZCipro/4HCipro                                                                                                                                                                                                                                                                                                       | Not specified                       |
| Narayanan et al (2007)              | Chennai, India                                                                         | General population | Active        | 2HRZE3/6HE                                                                                                                                                                                                                                                                                                                          | Self administered treatment / DOTS  |

|                                     |                                              |                                 |               |                                                                                                                                                                                                       |                                    |
|-------------------------------------|----------------------------------------------|---------------------------------|---------------|-------------------------------------------------------------------------------------------------------------------------------------------------------------------------------------------------------|------------------------------------|
| Parthasarathy et al (1991)          | Madras and Bangalore, India                  | General population              | Active        | R3: 3HRZS<br>R5: 3HRZS/5S <sub>2</sub> H <sub>2</sub> Z <sub>2</sub><br>R6: 3HZS/5S <sub>2</sub> H <sub>2</sub> Z <sub>2</sub>                                                                        | Health facility DOTS               |
| Perriens et al (1995)               | Kinshasa, DRC                                | General population              | Passive       | 2HRZ4HR<br>In some HIV positive, the treatment was extended                                                                                                                                           | Not specified                      |
| Singapore/BMRC (1981)               | Singapore, Chinese, Malay and Indian         | General population              | Active        | 2SHRZ/2 or 4 HRZ<br>or<br>2SHRZ/2 or 4 HR                                                                                                                                                             | Health facility DOTS               |
| Singapore/BMRC (1988)               | Singapore                                    | General population              | Active        | (1) 2SHRZ/4H <sub>3</sub> R <sub>3</sub> (2) 1SHRZ/5H <sub>3</sub> R <sub>3</sub> (3) 2HRZ/4H <sub>3</sub> R <sub>3</sub>                                                                             | Health facility DOTS               |
| Singapore/BMRC (1991)               | Singapore                                    | General population              | Active        | Initial phase: (1) 2SHRZ (2) 1SHRZ (3) 2HRZ<br>Continuation phase: 6HR3                                                                                                                               | Health facility DOTS               |
| Snider et al (1984)                 | Poland                                       | General population              | Not specified | (1) 2HRZ/4H2R2 (2) 2HRZS/4H2R2                                                                                                                                                                        | Health facility DOTS               |
| Somner et al (1990)                 | Britain                                      | General population              | Not specified | 1) 2HRSE/(4-10)HR 2) 2HRSE/(7-16)HR                                                                                                                                                                   | Not specified                      |
| Su et al (2001)                     | Taipei, Taiwan                               | General population              | Active        | (1) 2Rifater+E/Rifinah+E (2) 2HRZE/4HR                                                                                                                                                                | Self administered treatment        |
| Swai et al (1988)                   | Kenya                                        | Isoniazid resistant TB patients | Active        | 2SZRE/4RE or 2SZRE/7RE                                                                                                                                                                                | Community DOTS                     |
| Tam et al (2002)                    | Hong Kong                                    | General population              | Not specified | 2HRZS/HR <sub>3</sub><br>2HRZS/HRp <sub>1</sub><br>2HRZS/HRp <sub>1.2/3</sub>                                                                                                                         | Health facility DOTS               |
| Tanzania/BMRC (1985)                | Africa                                       | General population              | Active        | 2 SHRZ/4TH /// 2SHRZ/4H                                                                                                                                                                               | Health facility DOTS               |
| Teo et al (1999)                    | Singapore                                    | General population              | Active        | 2SHRZ/4H(3)R(3) /// 1SHRZ/5H(3)R(3) /// 2HRZ/4H(3)R(3)                                                                                                                                                | Health facility DOTS               |
| Tuberculosis Research Centre (1981) | Madras, India                                | General population              | Passive       | 2 weeks EHS plus → EH<br>or E <sub>2</sub> H <sub>2</sub> or E <sub>1</sub> H <sub>2</sub> or E <sub>1</sub> H <sub>1</sub>                                                                           |                                    |
| Tuberculosis Research Centre (1997) | Madurai, South India                         | General population              | Not specified | (1) 2HRZE/6EH<br>(2) 2E <sub>2</sub> H <sub>2</sub> R <sub>2</sub> Z <sub>2</sub> /4EHR<br>(3) 2H <sub>2</sub> R <sub>2</sub> Z <sub>2</sub> /4H <sub>2</sub> R <sub>2</sub>                          | Self administered treatment / DOTS |
| Velayutham et al (2020)             | Chennai, Madurai and Vellore in South India. | General population              | Non specified | 3MfxHRZE / 2MfxHRZE/2Mfx3H3R3 / 2HRZE/4HR                                                                                                                                                             | Health facility DOTS               |
| Wu et al (2015)                     | Taiwan                                       | General population              | Active        | The FDC group received Rifaters and E for the first two months, followed by Rifinahs (H + R) and E for an additional four months or longer. These separate formulation (SF) group received 2HRZE4HRE. | Health facility DOTS               |



|                                   |                                   |                                 |                    |                                                                                                                                   |                                               |
|-----------------------------------|-----------------------------------|---------------------------------|--------------------|-----------------------------------------------------------------------------------------------------------------------------------|-----------------------------------------------|
| Yan et al (2018)                  | China                             | Retreatment patients            | Active             | 2HREZS/ 6HRE - 5MxfPARfbEZ                                                                                                        | Health facility DOTS                          |
| Zierski et al (1981)              | Poland                            | General population              | Not specified      | Regimen A (6 HRE)<br>Regimen B (2 HREIHR)<br>Regimen C (2 HRE/IHRE)<br>Regimen D (2 HRE/IHRE)                                     | Not specified                                 |
| Observational prospective studies |                                   |                                 |                    |                                                                                                                                   |                                               |
| Anaam et al (2012)                | Yemen                             | General population              | Passive            | 4HRZE/6HE                                                                                                                         | Health facility DOTS                          |
| Anaam et al (2019)                | Yemen                             | General population              | Active             | 2HRZE/6HR                                                                                                                         | DOTS Comunitario                              |
| Anh et al (2020)                  | Vietnam                           | MDR                             | Active             | (4-6)LfxKmCfzPtoEHZ/5LfxCfzEZ                                                                                                     | Not specified                                 |
| Aung et al (2014)                 | Bangladesh                        | MDR                             | Active             | FX, E, Z, and clofazimine throughout, supplemented during the minimum 4-month intensive phase by kanamicin, prothionamide, and H. | Health facility DOTS                          |
| Banda et al (2000)                | Southern Region of Malawi         | Smear negative                  | Active             | 2ERHZ/6EH                                                                                                                         | Health facility DOTS                          |
| Becerra et al (2010)              | Lima, Peru                        | MDR TB patients                 | Active             | MDR-TB regimen                                                                                                                    | Health facility DOTS                          |
| Bechan et al (1997)               | Durban, South Africa              | General population              | Not specified      | (26weeks) H2R2Z2S2                                                                                                                | Health facility DOTS                          |
| Cao et al (1988)                  | China                             | General population              | Active             | 2H3R3Z3S3/4H3R3, 2H3R3Z3E3S3/6H3R3E3                                                                                              | Health facility DOTS                          |
| Chaisson et al (1996)             | Cité Soleil, Haiti                | General population              | Passive            | (8weeks)HRZE/(18weeks)HR                                                                                                          | Health facility DOTS                          |
| Chang et al (2004)                | Hong Kong                         | General population              | Passive            | 2HRZ/4HR<br>2RZE/4RE                                                                                                              | Health facility DOTS                          |
| Charalambous et al (2008)         | Free State Province, South Africa | South African gold miners       | Active             | Rifampin based short-course chemotherapy regimen(not specified)                                                                   | Facility based DOTS                           |
| Chien et al (2014)                | Taiwan                            | Isoniazid resistant TB patients | Passive            | 2HRZE/4HR                                                                                                                         | Health facility DOTS                          |
| Choi et al (2014)                 | South Korea                       | General population              | Active             | Not specified. 9-month treatment for susceptible TB, individual regimen for resistant patients.                                   | Not specified                                 |
| Connolly et al (1999)             | KwaZulu-Natal, South Africa       | General population              | Passive and Active | HRZE given in hospital (median 17 days), followed by 2H2R2Z2E2 to 6H2R2                                                           | Health facility DOTS and community based DOTS |
| Cowie et al (1989)                | South Africa                      | Gold miners                     | active             | Variable. Rifampin based regimens                                                                                                 | Health facility DOTS                          |

|                              |                                                    |                           |         |                                                                                                                                                                                                                                                                                                                                                                                                                                                                                                 |                                   |
|------------------------------|----------------------------------------------------|---------------------------|---------|-------------------------------------------------------------------------------------------------------------------------------------------------------------------------------------------------------------------------------------------------------------------------------------------------------------------------------------------------------------------------------------------------------------------------------------------------------------------------------------------------|-----------------------------------|
| Crampin et al (2010)         | Karonga, Malawi                                    | General population        | Active  | Smear-positive patients: Prior to 1997: 2SHRZ/6TH. 1997-2001: 2SHRZ/6EH After 2001: 2SHRZ/6SH.<br>Smear-negative patients: Prior to 1997: 1SHT/11TH. 1997-2001: 1SHE/11EH. After 2001: 2HRZ/6EH                                                                                                                                                                                                                                                                                                 | Not specified                     |
| d'Arc et al (2008)           | Recife, Brazil                                     | General population        | Passive | 2HRZ/4HR                                                                                                                                                                                                                                                                                                                                                                                                                                                                                        | Not specified                     |
| Dutt et al (1984)            | Arkansas, US                                       | General population        | Active  | 1HR/8H3R2                                                                                                                                                                                                                                                                                                                                                                                                                                                                                       | Self administered treatment /DOTS |
| Dutt et al (1990)            | Arkansas, US                                       | General population        | Passive | 1HR(Rifamate)/5HR                                                                                                                                                                                                                                                                                                                                                                                                                                                                               | Self administered treatment /DOTS |
| Escudero et al (2006)        | Hospital La Fuenfría, Madrid, Spain                | MDR                       | Active  | Empirical treatment based on prior treatment. One parenteral drug plus at least three oral drugs. "The parenteral drug was used during the first 6 months, as follows: 5 days a week for 2 months, 3 days a week for the next 2 months and 2 days a week for the last 2 months. Definitive therapeutic regimens were determined according to the DST results. The planned treatment duration was 18 months, or 12 months of continual negative cultures after the first two negative cultures." | Not specified                     |
| Fox et al (2018)             | Vietnam                                            | General population        | Mixed   | 2HRZE/4HR                                                                                                                                                                                                                                                                                                                                                                                                                                                                                       | Health facility DOTS              |
| Garcia Martinez et al (1996) | North-western region of Leon-Chinandega, Nicaragua | General population        | Active  | 2SRHZ/ 6TH (157 patients)<br>2STH/10TH (90 patients)                                                                                                                                                                                                                                                                                                                                                                                                                                            | Health facility DOTS              |
| Guerra-Assunção et al (2015) | Karonga, Malawi                                    | General population        | Active  | 1996-2001<br>New smear-positive patients: 2SHRZ/6HE.<br>New smear-negative patients: 1SEH/11HE<br>2001-2007: 2HRZE/6HE<br>After 2007: 2HRZE/4HR                                                                                                                                                                                                                                                                                                                                                 | Not specified                     |
| Hang et al (2015)            | Hanoi, Vietnam                                     | General population        |         | 2S(E)HRZ/6HE                                                                                                                                                                                                                                                                                                                                                                                                                                                                                    | Health facility DOTS              |
| Hawken et al (1993)          | Nairobi, Kenya                                     | HIV-1 infected patients   | Active  | 1TSH11TH<br>1TSH11TH + Another antituberculosis drug.<br>1HRZS 1HRZ 4TH                                                                                                                                                                                                                                                                                                                                                                                                                         | Not specified                     |
| Hesseling et al (2010)       | Western Cape Province, South Africa                | Non HIV-infected patients | Active  | 2RHZE/4HR                                                                                                                                                                                                                                                                                                                                                                                                                                                                                       | Facility based DOTS               |

|                             |                             |                       |               |                                                                                                                                                                                                                                                                                                                                                                                                                                                                                                                                                         |                                                    |
|-----------------------------|-----------------------------|-----------------------|---------------|---------------------------------------------------------------------------------------------------------------------------------------------------------------------------------------------------------------------------------------------------------------------------------------------------------------------------------------------------------------------------------------------------------------------------------------------------------------------------------------------------------------------------------------------------------|----------------------------------------------------|
|                             |                             |                       |               | *The intensive phase was prolonged to 3 months if smear conversion had not occurred at 2 months                                                                                                                                                                                                                                                                                                                                                                                                                                                         |                                                    |
| Houben et al (2012)         | Karonga, Malawi             | HIV-patients          | Active        | Smear positive before 1997: 2SHRZ/6TH<br>From 2001: 2EHRZ/6EH<br>Smear negative before 1997: 1SHT/11TH<br>From 2001: 1SHE/11HE<br>Since 2007: 2HRZE/4HR                                                                                                                                                                                                                                                                                                                                                                                                 | Not specified                                      |
| Huyen et al (2013)          | Mekong River Delta, Vietnam | General population    | Active        | 2HRSZ/6HE                                                                                                                                                                                                                                                                                                                                                                                                                                                                                                                                               | Not specified                                      |
| Jasmer et al (2004)         | San Francisco, US           | General population    | Passive       | 6 months of standard therapy                                                                                                                                                                                                                                                                                                                                                                                                                                                                                                                            | Health facility DOTS / Self administered treatment |
| Jimenez Corona et al (2013) | Orizaba, Veracruz, Mexico   | General population    | Active        | 1995 and 1998<br>New cases: 2HRZ/4HR<br>Retreatment cases: 2HRZ/4HR plus E or S.<br>After 1998<br>New cases: 2HRZE/4HR<br>Retreatment cases:<br>2HRZES/(1HRZE/5HRE.RZE/5HRE.                                                                                                                                                                                                                                                                                                                                                                            | Community based DOTS                               |
| Karagaoz et al (2009)       | Istanbul, Turkey            | MDR                   | Not specified | “Second-line drugs, occasionally, an aminoglycoside (amikacin, capreomycin), a quinolone derivative (ofloxacin, ciprofloxacin), prothionamide and cycloserine were used in treatment of MDR- TB patients and some of the first line drugs, such as Z and E, thought to be susceptible, were included in the new regimen. If quinolone derivatives and prothionamide had already been used in previous regimen, drugs such as clofazimine, para-aminosalicylic acid (PAS), T, amoxicillin-clavulanic acid and capreomycin were included in the regimen.” | Health facility DOTS                               |
| Kassim et al (1995)         | Abidjan, Nigeria            | General population    | Active        | 2HRZ4HR                                                                                                                                                                                                                                                                                                                                                                                                                                                                                                                                                 | Self administered treatment                        |
| Kuaban et al (2015)         | Cameroon                    | MDR                   | Active        | 4KmPtoCfzHEZ/8HKm                                                                                                                                                                                                                                                                                                                                                                                                                                                                                                                                       | Health facility DOTS                               |
| Lawal et al (2019)          | South africa                | General population    | Active        | Standard regimen                                                                                                                                                                                                                                                                                                                                                                                                                                                                                                                                        | Not specified                                      |
| Lee et al (2014)            | Taiwan                      | Diabetes              | Passive       | Standard regimen                                                                                                                                                                                                                                                                                                                                                                                                                                                                                                                                        | Health facility DOTS                               |
| Lee et al (2020)            | Seoul, South Korea          | Cavitary tuberculosis | Active        | 2HRZE/4HRor 2HRZE/ 7HR                                                                                                                                                                                                                                                                                                                                                                                                                                                                                                                                  | Not specified                                      |

|                           |                             |                                      |         |                                                                                                                                                                                                                                                                                |                                    |
|---------------------------|-----------------------------|--------------------------------------|---------|--------------------------------------------------------------------------------------------------------------------------------------------------------------------------------------------------------------------------------------------------------------------------------|------------------------------------|
| Malherbe et al (2020)     | Cape Town, South Africa     | General population                   | Active  | Standard regimen                                                                                                                                                                                                                                                               | Not specified                      |
| Mathur et al (2020)       | Hyderabad, Telangana, India | Smear positive pulmonary TB patients | Active  | Standard regimen                                                                                                                                                                                                                                                               | Not specified                      |
| McGreevy et al (2012)     | Post-au-Prince, Haiti       | HIV-1 infected recurrent TB patients |         | 2HRZES/1HRZE/5HRE                                                                                                                                                                                                                                                              | Not specified                      |
| Miles et al (1984)        | Nong Samet, Cambodia        | Refugees                             | Active  | 2HRSZ/4HR                                                                                                                                                                                                                                                                      | Health facility DOTS               |
| Narayanan et al (2010)    | Chennai and Madurai, India  | HIV-infected patients                | Active  | HIV-infected patients received 2H3R3Z3E3/4-7R3H3. Some HIV-negative patients were treated with the same regimen of 2HRZE/4R3H3 whereas, others, received a regimen containing 3HRZOfloracin/1 or 2 H3R3                                                                        | Facility based DOTS                |
| Nolan et al (2002)        | Seattle, US                 | isoniazid-resistant tuberculosis     | Passive | 6HREZ                                                                                                                                                                                                                                                                          | Self administered treatment / DOTS |
| Palmero et al (2004)      | Buenos Aires, Argentina     | MDR                                  | Active  | Individual regimens: E, Z, S and/or second line drugs                                                                                                                                                                                                                          | Self administered treatment / DOTS |
| Pandey et al (2020)       | India                       | General population                   | Active  | 2HRZE/4HR                                                                                                                                                                                                                                                                      | Health facility DOTS               |
| Peetluk et al (2019)      | Brazil                      | General population                   | Active  | 2HRZE/4HR                                                                                                                                                                                                                                                                      | Health facility DOTS               |
| Perez-Guzman et al (2002) | Mexico                      | Drug resistant                       | Active  | Treatment according DST results                                                                                                                                                                                                                                                | Self administered treatment        |
| Perriens et al (1991)     | DRC                         |                                      | Passive | 2HST/10TS                                                                                                                                                                                                                                                                      | Not specified                      |
| Pettit et al (2011)       | Tennessee, US               | General population                   | Passive | “National and international guidelines for treatment of drug-susceptible TB recommend a 6-month rifamycin-based regimen. In USA treatment is extended to 9 months in patients with cavitary pulmonary TB and a positive sputum culture after 2 months or silico tuberculosis.” | Facility based DOTS                |
| Piubello et al (2014)     | Niamey, Niger.              | MDR                                  | Active  | 4GfxCfzEZKmPtoH/8GfxCfzEZ                                                                                                                                                                                                                                                      | Health facility DOTS               |
| Prasad et al (2004)       | Uttar Pradesh, India        | MDR                                  | Active  | Kanamycin (initial 4-6 months), ethionamide, H, PAS and cycloserine for a minimum period of two years.                                                                                                                                                                         | Health facility DOTS               |

|                          |                                                                                                                                  |                           |               |                                                                                                                                                                                                                                 |                             |
|--------------------------|----------------------------------------------------------------------------------------------------------------------------------|---------------------------|---------------|---------------------------------------------------------------------------------------------------------------------------------------------------------------------------------------------------------------------------------|-----------------------------|
| Prasad et al (2008)      | India                                                                                                                            | General population        | Active        | Cat I, Cat II, Cat III                                                                                                                                                                                                          | Health facility DOTS        |
| Pulido et al (1997)      | Madrid, Spain                                                                                                                    | HIV-patients              | Passive       | Regimen that include H a R for 6 or more months supplemented with Z,E,S or combination for the first 2 months.                                                                                                                  | Not specified               |
| Reis et al (1990)        | Brazil                                                                                                                           | Pediatric population      | Active        | 6HR                                                                                                                                                                                                                             | Not specified               |
| Schwœbel et al (2020)    | Benin, Burkina Faso, Burundi, Cameroon, Central African Republic, Côte d'Ivoire, Democratic Republic of Congo, Niger and Rwanda. | General population        | Active        | 4-6Knm,Cfz,Mfx,HZPto/5MfxZCfz                                                                                                                                                                                                   | Health facility DOTS        |
| Shen et al (2017)        | Shanghai, China                                                                                                                  | General population        | Passive       | Standard regimen                                                                                                                                                                                                                | Not specified               |
| Sonnenberg et al (2001)  | Gauteng, South Province, South Africa                                                                                            | South African mineworkers | Active        | At least 6 months of 2HRZE/4HR.                                                                                                                                                                                                 | Health facility DOTS        |
| Spagnolo et al (1982)    | US                                                                                                                               | General population        | Not specified | 2HRE/7HR                                                                                                                                                                                                                        | Self administered treatment |
| Suryanto et al (2008)    | South Sulawesi Province, Republic of Indonesia                                                                                   | General population        | Active        | 2HRZE/3H3R3<br>4FDC (225 mg INH, 450 mg RMP, 1200 mg PZA and 825 mg EMB.) was used and 2FDC (450 mg INH and 450 mg RMP)                                                                                                         | Health facility DOTS        |
| Swaminathan et al (2008) | Tamparam, Chennai                                                                                                                | HIV-patients              | Active        | 2EHRZ3/4RH3                                                                                                                                                                                                                     | DOTS community              |
| Thomas et al (2005)      | Tamil Nadu, India                                                                                                                | General population        | Active        | 2H3R3Z3E3/4H3R3                                                                                                                                                                                                                 | Health facility DOTS        |
| Thomas et al (2019)      | Chennai and Pune, India                                                                                                          | General population        | Active        | (1) daily (daily in both intensive and continuation phases)—2EHRZ7/4HR7; (2) part-daily (daily intensive phase and intermittent continuation phase)— 2EHRZ7 /4HR3 ; and (3) intermittent (thrice weekly throughout)—2EHRZ3/4HR3 | Health facility DOTS        |
| Van Deun et al (2004)    | Bangladesh, India                                                                                                                | MDR-TB infected patients  | Passive       | New cases received 2HRZE/6HT. Retreatment cases received 2SEHRZ/1EHRZ/5EHR.                                                                                                                                                     | Health facility DOTS        |
| Van Deun et al (2010)    | Bangladesh                                                                                                                       | MDR                       | Active        | “All regimens were based on a fluoroquinolone (ofloxacin or, in regimen 6, gatifloxacin), kanamycin, and prothionamide as the core drugs, supplemented by other potentially active                                              | Health facility DOTS        |

|                                     |                                                                             |                        |         |                                                                                                                                 |                             |
|-------------------------------------|-----------------------------------------------------------------------------|------------------------|---------|---------------------------------------------------------------------------------------------------------------------------------|-----------------------------|
|                                     |                                                                             |                        |         | companion drugs (first-line drugs and clofazimine).”                                                                            |                             |
| Velayutham et al (2018)             | Tamil Nadu, Karnataka, Delhi, Maharashtra, Madhya Pradesh and Kerala, India | General population     | Active  | (2 H3R3Z3E3 / 4H3R3)                                                                                                            | Health facility DOTS        |
| Vree et al (2007)                   | Northern Vietnam                                                            | General population     | Active  | The standard treatment regimen for new patients consists of daily 2SHRZ/6HE).                                                   | Health facility DOTS        |
| Westerlund et al (2015)             | Lima, Peru                                                                  | General population     | Active  | Standard regimen                                                                                                                | Not specified               |
| Yoshiyama et al (2010)              | Khatmandu Valley, Nepal                                                     | Retreatment patients   | Active  | 2HRZE/1HRZE/5HRE                                                                                                                | Health facility DOTS        |
| Zheng et al (2020)                  | China                                                                       | General population     |         | Standard regimen                                                                                                                | Health facility DOTS        |
| Observational retrospective studies |                                                                             |                        |         |                                                                                                                                 |                             |
| Banu et al (2012)                   | Chennai, India                                                              | General population     | Active  | (2 H3R3Z3E3 / 4H3R3)                                                                                                            | Health facility DOTS        |
| Chiang et al (2006)                 | Taipei, Taiwan                                                              | MDR TB patients        | Active  | Individualized MDR TB 1                                                                                                         | Self administered treatment |
| Ciza et al (2020)                   | Burundi                                                                     | Rifampicine resistance | Passive | (4-5)KmMfxPtoCfHZE/5MfxCfzZE                                                                                                    | Health facility DOTS        |
| Dale et al (2017)                   | Victoria, Australia                                                         | General population     | Passive | 6-month standard regimen                                                                                                        | Self administered treatment |
| Dangisso et al (2018)               | Dale and Yirgalem, Ethiopia                                                 | Smear positive         | Active  | Standard regimen                                                                                                                | Not specified               |
| Datiko et al (2009)                 | Dale and Wonsho, Sidama, Ethiopia                                           | General population     | Active  | Standard regimen                                                                                                                | Health facility DOTS        |
| Decro et al (2020)                  | Bangladesh                                                                  | RR TB patients         | Passive | 2KmCfxGfxEHPZ / 5 GfxEZCfz (Gfx and H in high dose regimen)                                                                     | Not specified               |
| Gelmanova et al (2015)              | Tomsk, Russian Federation                                                   | MDR TB patients        | Passive | All patients were treated with regimens that included second-line drugs, fluoroquinolones and parenteral agents (not specified) | Not specified               |
| Glynn et al (2010)                  | Gauteng, South Africa                                                       | Miners                 | Passive | 2HRZE 4HR<br>2HRZES, 1HRZE, and 5HRE                                                                                            | Health facility DOTS        |
| Guglielmetti et al (2016)           | Bligny, Pitié Salpêtrière and Bichat Hospitals, France                      | MDR                    | Passive | According to patient include bedaquiline                                                                                        | Not specified               |
| He et al (2010)                     | Heilongjiang, China                                                         | MDR                    | Passive | Second line treatment                                                                                                           | Health facility DOTS        |

|                                           |                                                     |                                  |               |                                                                                                                                                                                                                                                        |                             |
|-------------------------------------------|-----------------------------------------------------|----------------------------------|---------------|--------------------------------------------------------------------------------------------------------------------------------------------------------------------------------------------------------------------------------------------------------|-----------------------------|
| Jo et al (2014)                           | Seoul, South Korea                                  | General population               | Passive       | 2HRZE/4HRE                                                                                                                                                                                                                                             | Self administered treatment |
| Kim et al (2017)                          | South Korea                                         | General population               | Not specified | Culture positive: 4SHRZ or 4S3H3R3Z3 or 6S3H3R3Z3 . Cultures negative 3SHRZ or 3S3H3R3Z3 or 4S3H3R3Z3.                                                                                                                                                 | Health facility DOTS        |
| Lee et al (2011)                          | Seoul, South Korea                                  | MDR TB patients                  | Not specified | Drug resistant TB regimen                                                                                                                                                                                                                              | Not specified               |
| Lee et al (2015)                          | Seoul, South Korea                                  | H resistant TB patients          | Passive       | Drug resistant TB regimen                                                                                                                                                                                                                              | Not specified               |
| Liu et al (2020)                          | Beijing                                             | General population               | Passive       | WHO recommendation                                                                                                                                                                                                                                     | Health facility DOTS        |
| Luzze et al (2013)                        | Kampala, Uganda                                     | General population               | Active        | 94%: 2HRZE/4-6RZ<br>2HRZE/6EZ                                                                                                                                                                                                                          | Not specified               |
| Ma et al (2018)                           | Beijing Chest Hospital, , Shenyang Chest Hospital   | Diabetes Mellitus 2              | Passive       | 2HREZS/6HRE                                                                                                                                                                                                                                            | Not specified               |
| Marx et al (2014) / Dippenar et al (2019) | Cape Town, South Africa                             | General population               | Active        | Standard first-line treatment                                                                                                                                                                                                                          | Facility based DOTS         |
| Migliori et al (2002)                     | Ivanovo Oblast, Russian Federation                  | MDR TB patients                  | Passive       | Cat-I, Cat-II, Cat-III                                                                                                                                                                                                                                 | Not specified               |
| Moosazadeh et al (2015)                   | Iran                                                | General population               | Passive       | Standard regimen                                                                                                                                                                                                                                       | Not specified               |
| Moreno-Martinez et al (2007)              | Región Soconusco, Chiapas, México                   | General population               | Passive       | Not specified                                                                                                                                                                                                                                          | Not specified               |
| Nahid et al (2007)                        | San Francisco, US                                   | HIV-1 infected patients          | Passive       | Rifamycin based 6 month regimen.<br>32 patients on ARV took rifabutin                                                                                                                                                                                  | Facility based DOTS         |
| Nettles et al (2004)                      | Baltimore, US                                       | General population               | Passive       | “ All patients were treated with 15 daily doses of 4-drug therapy (H, R or rifabutin, Z, and E in standard doses. Patients subsequently received twice-weekly- 4-drug therapy for 6 weeks, followed by a course of twice-weekly I and R or rifabutin”. | Facility based DOTS         |
| Ormerod et al (2002)                      | Blackburn, Hyndburn and Ribble Valley districts, UK | General population               | Passive       | 2RHZ(E)/4RH                                                                                                                                                                                                                                            | Not specified               |
| Park et al (2019)                         | South Korea                                         | Rheumatological disease patients |               | 2HRZE/4HR                                                                                                                                                                                                                                              | Not specified               |
| Picon et al (2007)                        | Rio Grande do Sul, Porto Alegre, Brazil             | General population               | Passive       | 2HRZ/4HR<br>Other regimens used, R always included.                                                                                                                                                                                                    | Self administered treatment |

|                              |                                  |                    |         |                                                                                                                                                                        |                      |
|------------------------------|----------------------------------|--------------------|---------|------------------------------------------------------------------------------------------------------------------------------------------------------------------------|----------------------|
| Piubello et al (2020)        | Niamey, Maradi and Zinder, Niger | RR/MDR patients    | Active  | MDR TB regimen                                                                                                                                                         | Health facility DOTS |
| Seon et al (2014)            | Republic of Korea                | General population | Active  | 2HRZE/7HRE                                                                                                                                                             | Not specified        |
| Shin et al (2006)            | Peru                             | MDR                | Mixed   | “Regimens generally included at least 5 drugs to which the infecting isolate was susceptible, and treatment duration was 18–24 months.”                                | Not specified        |
| Slutkin et al (1988)         | San Francisco                    | General population | Passive | Treatment regimen was 3HRE/6HR.                                                                                                                                        | Health facility DOTS |
| Sun et al (2017)             | Henan Province, China            | General population | Active  | 2HRZE4HR<br>Retreatment: 2HRZE/6HRE                                                                                                                                    | Health facility DOTS |
| Van der Heijden et al (2018) | Durban, South Africa             | General population | Passive | New drug-susceptible TB patients received 2HREZ/4HR.                                                                                                                   | Not specified        |
| Van Deun et al (2006)        | Bangladesh                       | General population | Passive | 2EHRZ/6HT control<br>3EHRZ/6HT extension group                                                                                                                         | Not specified        |
| Vieira et al (2017)          | Carapicuíba, Sao Paulo Brazil    | General population | Passive | Standard treatment                                                                                                                                                     | Health facility DOTS |
| Wang et al (2015)            | Taiwan                           | HIV-patients       | Active  | 2HRZE/6HR                                                                                                                                                              | Health facility DOTS |
| Wu et al (2015)              | Changning, Shanghai, China       | General population | Passive | 2HRZE(S)/4HR                                                                                                                                                           | Not specified        |
| Xia et al (2014)             | Beijing, China                   | General population | Passive | 2H3R3Z3E3/4H3R3 or 2HRZE/4HR                                                                                                                                           | Health facility DOTS |
| Yen et al (2014)             | Taipei, Taiwan                   | General population | Passive | WHO recommended treatment                                                                                                                                              | Health facility DOTS |
| Yoshiyama et al (2014)       | Fukujuji Hospital, Japan         | MDR TB patients    | Passive | E, Z, Cm (until 1995) or aminoglycoside, fluoroquinolone (Ofx in 1990s and Gfx or Lfx in the 2000s), Eto, Cs, an PAS.<br>The minimum duration of treatment was 2 years | Not specified        |
| Zhdanov et al (2017)         | Israel                           | General population | Passive | Standard treatment                                                                                                                                                     | Health facility DOTS |
| TB program databases         |                                  |                    |         |                                                                                                                                                                        |                      |
| Bandera et al (2001)         | Lombardy region, Milan, Italy    | General population | Passive | 6 months of combination therapy (not specified)                                                                                                                        | Not specified        |
| Cacho et al (2007)           | Madrid, Spain                    | General population | Passive | 2HRZ/4HZ or 2HRZE / 4HR                                                                                                                                                | Not specified        |
| Caminero et al (2001)        | Gran Canaria, Spain              | General population | Active  | 2HRZ/4HR                                                                                                                                                               | Facility based DOTS  |
| Das et al (1995)             | Madras India                     | General population | Unknown | Not specified                                                                                                                                                          | Not specified        |



|                                     |                                      |                                    |               |                                                                                                                                                                                                          |                      |
|-------------------------------------|--------------------------------------|------------------------------------|---------------|----------------------------------------------------------------------------------------------------------------------------------------------------------------------------------------------------------|----------------------|
| Das et al (1993)                    | Madras India                         | General population                 | Unknown       | Not specified                                                                                                                                                                                            | Not specified        |
| Dobler et al (2009)                 | New South Wales, Australia           | General population                 | Passive       | Drug-sensitive TB: 2HRZE/4HR<br>MDR TB: Second line TB drugs for 1 or 2 years                                                                                                                            | Facility based DOTS  |
| ElSahly et al (2004)                | Houston and Harris County, Texas, US | General population                 | Active        | Not specified                                                                                                                                                                                            | Community based DOTS |
| Folkvardsen et al (2020)            | Denmark                              | Patients infected with DKC2 strain | Not specified | Not specified                                                                                                                                                                                            | Not specified        |
| Lourenco et al (2000)               | Rio de Janeiro, Brasil               | HIV-infected patients              | Passive       | 2HRZE/7HR                                                                                                                                                                                                | Not specified        |
| Parvaresh et al (2018)              | New South Wales                      | General population                 | Passive       | Not specified                                                                                                                                                                                            | Health facility DOTS |
| Quy et al (2002) / Lan et al (2003) | Ho Chi Min, Vietnam                  | General population                 | Not specified | 2SRHZ/6HE                                                                                                                                                                                                | Facility based DOTS  |
| Rosser et al (2018)                 | Lecestershire and Rutland, UK        | General population                 | Not specified | 2EHRZ3/4RH3                                                                                                                                                                                              | Not specified        |
| Schiroli et al (2015)               | Lombardy region, Milan, Italy        | General population                 | Passive       | Not specified                                                                                                                                                                                            | Not specified        |
| Shamputa et al (2007)               | Bangladesh                           | General population                 | Passive       | New smear-positive cases received a daily Category I: 2HRZE/6HT. Retreatment patients were treated with Category II: 2SHREZ/1HREZ/5H3R3E3                                                                | Not specified        |
| Shen et al (2006)                   | Shanghai, China                      | General population                 | Active        | Not specified                                                                                                                                                                                            | Community DOTS       |
| Umubyeyi et al (2007)               | Rwanda                               | General population                 | Active        | New smear-positive cases received standard Category I regimen, consisting of 2HRZE/4H3R3. Retreatment patients with at least one month of a drug intake were treated with Category II 2HRZES/1ZE/5H3R3E3 | Not specified        |
| VanRie et al (1999)                 | Cape Town, South Africa              | General population                 | Passive       | New cases were treated with H, ryfampin, and Z for 6 to 8 months, while retreatment patients received a four-drugs regimen.                                                                              | Health facility DOTS |

\*The number before the acronym represents the number of months. The subscript represents the weekly dose, if none, it is taken daily, H=isoniazid, R=rifampicin, Z=pyrazinamide, E=Ethambutol, S=Streptomycin, TH=Thiacetazone, Bdq=Bedaquiline, Pto=pretomonid Lnz=linezolid, Mfx=Moxifloxacin, Cfz=clofazimine, Km=kanamycin, Ofx=ofloxacin, Lfx=levofloxacin, Cs=cycloserine, Eto=ethionamide, Gfx=Gatifloxacin, PAS =*p-aminosalicylic acid*

## Appendix 6. Individual data of included studies

Table S1 Individual outcomes of cohort studies and clinical trials included in the review and calculation of person-years of follow up

| Author                              | Extracted by study                                |                                         |       |       |       |                   |                |                                             |                           |                        |                                 | Calculated                         |                                                   |                | WHO estimates                        |
|-------------------------------------|---------------------------------------------------|-----------------------------------------|-------|-------|-------|-------------------|----------------|---------------------------------------------|---------------------------|------------------------|---------------------------------|------------------------------------|---------------------------------------------------|----------------|--------------------------------------|
|                                     | N° of patients successfully treated (denominator) | N° of TB recurrent episodes (numerator) | Death | Moved | Other | Loss to follow up | Total censored | Planned follow-up (years, unless specified) | Person years of follow up | Mean follow-up (years) | Mean time to recurrence (years) | Total person yearssears calculated | Recurrent TB incidence calculated (per 100 pyear) | Formula used * | Background incidence per 100,000 pop |
| <b>Clinical trials</b>              |                                                   |                                         |       |       |       |                   |                |                                             |                           |                        |                                 |                                    |                                                   |                |                                      |
| Castelo et al (1989)                | 506                                               | 27                                      | -     | -     | -     | -                 | 0              | 1                                           | -                         | -                      | -                               | 4923                               | 5.48                                              | F5             | 62.3                                 |
| Chaulet et al (1995)                | 228                                               | 1                                       | -     | -     | -     | 21                | 21             | 2                                           | -                         | 2.00                   | -                               | 435                                | 0.23                                              | F3             | 49.0                                 |
| Cohn et al (1990)                   | 108                                               | 2                                       | 7     | -     | -     | -                 | 7              | 3                                           | -                         | -                      | 2.58                            | 313                                | 0.64                                              | F4             | 9.2                                  |
| East African/BMRC (1980)            | 737                                               | 57                                      | 45    | -     | 15    | 45                | 105            | 2                                           | -                         | -                      | -                               | 1312                               | 4.34                                              | F5             | 103.1                                |
| East African/BMRC (1981)            | 551                                               | 131                                     | 6     | -     | 3     | 31                | 40             | 1.2                                         | -                         | -                      | -                               | 543                                | 24.12                                             | F5             | 212.0                                |
| Fitzgerald et al (2000)             | 274                                               | 15                                      | -     | -     | -     | -                 | 0              | -                                           | 542                       | -                      | -                               | 542                                | 2.77                                              | F1             | 123.9                                |
| Gengiah et al (2014)                | 51.00                                             | 8                                       | -     | 8     | -     | -                 | -              | -                                           | 113                       | -                      | 1.75                            | 113                                | 7.07                                              | F1             | 820.0                                |
| Gonzalez-Montaner et al (1994)      | 467                                               | 5                                       | -     | -     | -     | 116               | 116            | 2                                           | -                         | -                      | -                               | 813                                | 0.62                                              | F5             | 39.9/48.2/82.3                       |
| Gopalan et al (2018)                | 241                                               | 16                                      | -     | -     | -     | 14.00             | 14             | 1                                           | 225                       | -                      | -                               | 225                                | 7.12                                              | F1             | 234.0                                |
| Hong et al (1988)                   | 352                                               | 44                                      | -     | -     | -     | 192               | 192            | 2                                           | -                         | -                      | -                               | 468                                | 9.40                                              | F5             | 254.7                                |
| Hong Kong Chest Service (1982)      | 792                                               | 22                                      | 18    | -     | 3     | 20                | 41             | 1.5                                         | -                         | -                      | -                               | 1141                               | 1.93                                              | F5             | 150.3                                |
| Hong Kong Chest Service/BMRC (1991) | 888                                               | 34                                      | 11    | 12    | 6     | 27                | 56             | 2.5                                         | -                         | -                      | -                               | 2108                               | 1.61                                              | F5             | 145.4                                |
| Jasmer Lorna et al (2004)           | 1229                                              | 81                                      | -     | -     | -     | -                 | 0              | 2                                           | -                         | -                      | -                               | 2377                               | 3.41                                              | F5             | 6.7                                  |
| Jawahar et al (2013)                | 380                                               | 40                                      | -     | -     | -     | -                 | 0              | 2                                           | -                         | -                      | -                               | 720                                | 5.56                                              | F5             | 279.0                                |
| Johnson et al (2000)                | 225                                               | 18                                      | -     | -     | -     | -                 | 87             | 2                                           | 335                       | -                      | -                               | 335                                | 5.36                                              | F5             | 117.0                                |
| Johnson et al (2009)                | 388                                               | 18                                      | 4     | -     | -     | 2                 | 6              | 2                                           | -                         | -                      | 5.00                            | 824                                | 0.35                                              | F4             | 274.0                                |
| Johnson et al (2003)                | 95                                                | 2                                       | -     | -     | -     | -                 | 0              | 6                                           | -                         | -                      | -                               | 564                                | 2.18                                              | F5             | 248.0                                |
| Kennedy et al (1996)                | 168                                               | 7                                       | 2     | 10    | -     | -                 | 12             | 0.5                                         | -                         | -                      | -                               | 79                                 | 8.83                                              | F5             | 95.7                                 |

|                                     |       |     |    |    |    |     |     |                                 |      |      |      |         |      |    |        |
|-------------------------------------|-------|-----|----|----|----|-----|-----|---------------------------------|------|------|------|---------|------|----|--------|
| Kenyan/Zambian/BMRC (1989)          | 502   | 30  | 3  | -  | 1  | 42  | 46  | 2                               | -    | -    | -    | 928     | 3.23 | F5 | 128.5  |
| Kohno et al (1992)                  | 92    | 0   | -  | -  | -  | 16  | 16  | 2                               | -    | -    | -    | 168     | 0.00 | F5 | 46.3   |
| Lee et al (2012)                    | 13    | 0   | -  | -  | -  | -   | 0   | 1                               | -    | -    | -    | 13      | 0.00 | F5 | 94.0   |
| Madras/BMRC (1989)                  | 1620  | 82  | 19 | 76 | 2  | 21  | 118 | 4.5                             | -    | -    | -    | 6840    | 1.20 | F5 | 150.2  |
| Merle et al (2014)                  | 1356  | 148 | 37 | -  | 20 | 172 | 229 | 2.0                             | -    | -    | -    | 2335    | 6.34 | F5 | 820.0  |
| Mohanty et al (1993)                | 35    | 4   | -  | -  | -  | -   | 0   | 24                              | -    | -    | -    | 792     | 6.06 | F5 | 120.0  |
| Narayanan et al (2007)              | 413   | 20  | -  | -  | -  | -   | 0   | 2                               | -    | -    | -    | 806     | 2.48 | F1 | 289.0  |
| Parthasarathy et al (1991)          | 688   | 85  | 7  | 22 | 4  | -   | 33  | 24 months after treatment start | -    | -    | -    | 1046    | 8.13 | F5 | 152.2  |
| Perriens et al (1995)               | 420   | 19  | 37 | -  | -  | 117 | 154 | 1.5                             | -    | -    | -    | 501     | 3.80 | F5 | 91     |
| Singapore/BMRC (1988)               | 350   | 11  | 13 | 2  | 3  | 4   | 22  | 2                               | -    | -    | -    | 667     | 1.65 | F5 | 72.1   |
| Singapore/BMRC (1991)               | 287   | 10  | 5  | 1  | -  | -   | 6   | 1.5                             | -    | -    | -    | 419     | 2.39 | F5 | 98.5   |
| Snider et al (1984)                 | 272   | 5   | -  | -  | -  | -   | 0   | 2                               | -    | -    | -    | 539     | 0.93 | F5 | 61     |
| Su et al (2001)                     | 51    | 1   | -  | -  | -  | -   | 0   | 2                               | -    | -    | -    | 101     | 0.99 | F5 | 33.7   |
| Swai et al (1988)                   | 224   | 8   | 7  | -  | -  | 39  | 46  | 2                               | -    | -    | -    | 394     | 2.03 | F5 | 33.00  |
| Tam et al (2002)                    | 534   | 46  | 6  | -  | -  | -   | 6   | 4.5                             | -    | -    | -    | 2286    | 2.01 | F5 | 109.3  |
| Tanzania/BMRC (1985)                | 224   | 14  | 2  | -  | -  | 17  | 19  | 2                               | -    | -    | -    | 415     | 3.37 | F5 | 62     |
| Teo et al (1999)                    | 271   | 14  | 14 | -  | -  | 10  | 24  | 5                               | -    | -    | -    | 1260    | 1.11 | F5 | 76.3   |
| Tuberculosis Research Centre (1981) | 172   | 52  | -  | -  | -  | -   | 0   | 4                               | -    | -    | -    | 584     | 8.90 | F5 | 300.0  |
| Tuberculosis Research Centre (1997) | 787   | 65  | 1  | -  | -  | 3   | 4   | 2                               | -    | -    | -    | 1505    | 4.32 | F5 | 117.6  |
| Wu et al (2015)                     | 98    | 0   | -  | -  | -  | -   | 0   | 1                               | -    | -    | -    | 98      | 0.00 | F5 | 82.0   |
| Yan et al (2018)                    | 661   | 51  | -  | -  | -  | 215 | 215 | 5                               | -    | -    | -    | 2640    | 1.93 | F5 | 73.0   |
| Zierski et al (1981)                | 363   | 54  | 13 | -  | -  | 33  | 46  | 2.5                             | -    | -    | -    | 783     | 6.90 | F5 | 451.0  |
| Conradie et al (2020)               | 100   | 2   | 1  | -  | 1  | 1   | 3   | 0.5                             | -    | -    | -    | 48.75   | 4.10 | F5 | 146.00 |
| Maug et al (2020)                   | 638   | 5   | -  | -  | -  | 38  | 38  | 1                               | -    | -    | -    | 616.50  | 0.81 | F5 | 221.00 |
| Velayutham et al (2020)             | 1180  | 84  | -  | -  | -  | -   | 0   | 2                               | -    | -    | -    | 2276.00 | 3.69 | F5 | 234.00 |
| <b>Cohort studies</b>               |       |     |    |    |    |     |     |                                 |      |      |      |         |      |    |        |
| Anaam et al (2012)                  | 814   | 44  | 16 | -  | -  | 24  | 40  | 1                               | -    | -    | 0.55 | 774     | 5.68 | F5 | 25     |
| Aung et al (2014)                   | 435   | 6   | -  | -  | -  | -   | 0   | 2                               | -    | -    | -    | 864     | 0.69 | F3 | 221    |
| Banu et al (2012)                   | 238   | 14  | -  | -  | -  | -   | 0   | 2                               | -    | -    | -    | 462     | 3.03 | F4 | 234    |
| Becerra et al (2010)                | 442   | 16  | 85 | -  | -  | 40  | 125 | 2.0                             | 646  | -    | 0.53 | 646     | 2.48 | F5 | 183.00 |
| Bechan et al (1997)                 | 348   | 18  | -  | 33 | -  | -   | 33  | -                               | -    | 1.75 | 1.03 | 621     | 2.90 | F5 | 212.7  |
| Cao et al (1988)                    | 649   | 28  | 39 | 1  | -  | -   | 40  | 2                               | -    | -    | -    | 1230    | 2.28 | F1 | 29.5   |
| Chaisson et al (1996)               | 341   | 13  | -  | -  | -  | -   | 0   | 3.5                             | -    | -    | -    | 1157    | 1.12 | F1 | 145.1  |
| Chang et al (2004)                  | 12183 | 113 | -  | -  | -  | -   | -   | 2.0                             | -    | -    | 8.90 | 25146   | 0.45 | F5 | 36.4   |
| Charalambous et al (2008)           | 609   | 42  | -  | -  | -  | -   | 0   | 31 -Mar-2002                    | 7096 | 1.02 | -    | 7096    | 0.59 | F1 | 585.00 |

|                              |                |     |     |    |    |     |     |              |      |                          |      |       |       |    |        |
|------------------------------|----------------|-----|-----|----|----|-----|-----|--------------|------|--------------------------|------|-------|-------|----|--------|
| Chiang et al (2006)          | 153            | 10  | -   | -  | -  | -   | 0   | 6            | 493  | -                        | -    | 494   | 2.02  | F5 | 8.70   |
| Chien et al (2014)           | 328            | 4   | -   | -  | -  | -   | -   | 2            | -    | -                        | -    | 652   | 0.61  | F5 | 85.00  |
| Choi et al (2014)            | 289            | 17  | 20  | -  | -  | 11  | 31  | 3.3          | -    | 0.83                     | -    | 869   | 1.96  | F5 | 88     |
| Connolly et al (1999)        | 403            | 19  | 58  | 78 | -  | -   | 136 | -            | 499  | 1.20                     | -    | 499   | 3.81  | F5 | 323    |
| Cowie et al (1989)           | 2776           | 378 | -   | -  | -  | -   | 0   | 3            | 5442 | -                        | -    | 5442  | 6.95  | F5 | 175.4  |
| Crampin et al (2010)         | 584            | 53  | -   | -  | -  | -   | 0   | 10.8         | 1646 | -                        | -    | 1646  | 3.22  | F5 | 392.00 |
| d'Arc et al (2008)           | 754            | 37  | 43  | -  | -  | -   | 43  | 5.0          | -    | -                        | -    | 3570  | 1.04  | F4 | 104    |
| Dale et al (2017)            | 3885           | 20  | -   | -  | -  | -   | 0   | 31/Dec/ 2014 | -    | 5.70                     | 2.66 | 2227  | 0.90  | F5 | 6.5    |
| Dangisso et al (2018)        | 1688           | 101 | -   | -  | -  | -   | 0   | -            | -    | -                        | -    | 6645  | 1.52  | F5 | 310    |
| Datiko et al (2009)          | 368            | 15  | -   | -  | -  | -   | 0   | -            | 1463 | 3.87                     | -    | 1463  | 1.03  | F5 | 168    |
| Dobler et al (2009)          | 3731           | 15  | -   | -  | -  | -   | 0   | 31/Dec/ 2006 | -    | 5.70                     | 1.42 | 2122  | 0.71  | F5 | 6.3    |
| Picon et al (2007)           | 610            | 26  | -   | -  | -  | -   | 0   | -            | -    | 7.70                     | -    | 5200  | 0.50  | F5 | 45     |
| Dutt et al (1984)            | 751            | 15  | 105 | 45 | -  | -   | 150 | 7            | -    | -                        | -    | 4680  | 0.32  | F5 | 11.8   |
| Dutt et al (1990)            | 211            | 5   | 34  | 6  | -  | -   | 40  | 2            | 401  | 3.75                     | -    | 401   | 1.25  | F5 | 11.8   |
| Escudero et al (2006)        | 21             | 0   | -   | -  | -  | -   | 0   | 2            | -    | -                        | -    | 42    | 0.00  | F5 | 23     |
| Fox et al (2018)             | 9825           | 498 | 198 | -  | -  | -   | 198 | 2            | -    | -                        | -    | 18954 | 2.63  | F1 | 133    |
| Garcia Martinez et al (1996) | 204            | 3   | 5   | -  | -  | 10  | 15  | 17-32 months | 388  | -                        | 2.05 | 388   | 0.77  | F5 | 84.00  |
| Gelmanova et al (2015)       | 399            | 27  | 30  | 20 | 41 | 15  | 106 | 6            | 1320 | 3.53                     | -    | 1321  | 2.04  | F5 | 80.2   |
| Glynn et al (2010)           | 646            | 164 | -   | -  | -  | -   | 0   | 31-Dec- 2004 | 1408 | -                        | -    | 1408  | 11.65 | F5 | 245.4  |
| Guerra-Assunção et al (2015) | 1471           | 139 | -   | -  | -  | 64  | 64  | -            | 6306 | -                        | -    | 6306  | 2.20  | F5 | 153    |
| Guglielmetti et al (2016)    | 36             | 0   | -   | -  | -  | 13  | 13  | 2            | -    | -                        | -    | 59    | 0.00  | F5 | 9      |
| Hang et al (2015)            | 413            | 30  | -   | -  | -  | 10  | 10  | 1.3          | -    | 1.33                     | 0.38 | 544   | 5.52  | F5 | 164.00 |
| Hawken et al (1993)          | 196            | 11  | 12  | -  | 19 | -   | 31  | -            | 2598 | 1.25                     | 8.00 | 2598  | 0.42  | F5 | 72.3   |
| He et al (2010)              | 194            | 63  | 12  | 56 | 7  | 20  | 95  | 4            | -    | 4.00                     | -    | 586   | 10.75 | F5 | 94     |
| Hesseling et al (2010)       | 211            | 22  | 5   | 10 | -  | 21  | 36  | 2.0          | -    | -                        | -    | 364   | 6.04  | F5 | 841    |
| Houben et al (2012)          | 1133           | 103 | 309 | -  | -  | 105 | 414 | 30-Jun-2011  | 4353 | -                        | -    | 4353  | 2.37  | F5 | 75     |
| Huyen et al (2013)           | 1073           | 35  | 20  | -  | -  | 5   | 25  | 1.5          | 1658 | 1.53                     | -    | 1658  | 2.11  | F5 | 172    |
| Jasmer et al (2004)          | 305            | 3   | -   | -  | -  | 36  | 36  | 1            | -    | -                        | -    | 286   | 1.05  | F5 | 5.7    |
| Jimenez Corona et al (2013)  | 1019           | 74  | -   | -  | -  | -   | 0   | -            | -    | 5.14                     | -    | 5238  | 1.41  | F5 | 21     |
| Jo et al (2014)              | 317            | 6   | -   | -  | -  | -   | 0   | 1            | -    | -                        | 0.30 | 313   | 1.92  | F5 | 85     |
| Karagaoz et al (2009)        | 102            | 0   | -   | -  | -  | 13  | 13  | 2            | -    | 1.60                     | -    | 191   | 0.00  | F5 | 33     |
| Kassim et al (1995)          | 523            | 20  | -   | -  | -  | -   | 0   | 1.5          | -    | -                        | -    | 770   | 2.60  | F3 | 216    |
| Kim et al (2017)             | A: 30<br>B: 56 | 1   | -   | -  | -  | -   | -   | -            | -    | A:<br>1.08<br>B:<br>0.96 | 1.48 | 86.38 | 1.16  | F4 | 92     |

|                              |        |     |    |    |    |     |     |                               |              |             |      |       |       |      |        |     |
|------------------------------|--------|-----|----|----|----|-----|-----|-------------------------------|--------------|-------------|------|-------|-------|------|--------|-----|
| Kuaban et al (2015)          | 134    | 0   | -  | -  | -  | 17  | 17  | 1                             | -            | -           | -    | 126   | 0.00  | F5   | 271    |     |
| Lawal et al (2019)           | 53     | 3   | -  | -  | -  |     | 0   | 0.5                           | -            | -           | 0.42 | 26    | 11.43 | F5   | 567    |     |
| Lee et al (2011)             | 90     | 4   | -  | -  | -  |     | 0   | 2                             | -            | 3.23        | 1.10 | 290   | 1.38  | F1   | 77.00  |     |
| Lee et al (2014)             | 21939  | 305 | -  | -  | -  | -   | -   | 31-Dec- 2010                  | -            | 3.00        | 1.40 | 62500 | 0.49  | F1   | 89.00  |     |
| Lee et al (2015)             | 133    | 5   | -  | -  | -  | -   | 0   | -                             | -            | 0.53        | -    | 71    | 7.05  | F5   | 88     |     |
| Luzze et al (2013)           | 1701   | 171 | -  | -  | -  | -   | 0   | -                             | -            | 1.24        | 0.54 | 2036  | 8.40  | F1   | 400    |     |
| Ma et al (2018)              | 58     | 16  | -  | -  | -  | 0   | 0   | 3                             | -            | -           | -    | 150   | 10.67 | F5   | 64     |     |
| McGreevy et al (2012)        | 120    | 5   | 8  | -  | -  | 5   | 13  | 3                             | -            | 4.50        | 1.42 | 348   | 1.44  | F5   | 238.00 |     |
| Migliori et al (2002)        | 21     | 5   | -  | -  | -  | -   | 0   | -                             | -            | 0.54        | 0.86 | 17    | 29.52 | F5   | 89     |     |
| Moreno-Martinez et al (2007) | 310    | 39  | -  | -  | -  | -   | 0   | -                             | 312          | 1.17        | -    | 312   | 12.49 | F5   | 21.00  |     |
| Nahid et al (2007)           | 558    | 16  | 53 | 26 |    | 128 | 207 | 1                             | 4489         | -           | -    | 4489  | 0.36  | F5   | 8.70   |     |
| Nettles et al (2004)         | 407    | 14  | -  | -  | -  | -   | 0   | 1                             | -            | -           | -    | 400   | 3.50  | F5   | 8.70   |     |
| Nolan et al (2002)           | 42     | 2   | -  | -  | -  | -   | 0   | 2                             | -            | -           | -    | 82    | 2.44  | F4   | 8.6    |     |
| Palmero et al (2004)         | 73     | 7   | -  | -  | -  | -   | 0   | 1                             | -            | -           | -    | 70    | 10.07 | F5   | 34.6   |     |
| Park et al (2017)            | 51     | 8   | -  | 8  | -  | -   | 8   | -                             | 113          | -           | 1.75 | 113   | 7.07  | F5   | 820    |     |
| Perez-Guzman et al (2002)    | 31     | 1   | 3  | -  | -  | 11  | 14  | 5                             | -            | -           | -    | 118   | 0.85  | F5   | 18.3   |     |
| Perriens et al (1991)        | 332    | 20  | -  | -  | -  | 49  | 49  | 1                             | 244          | 0.75 / 0.89 | -    | 244   | 8.19  | F5   | 300.00 |     |
| Pettit et al (2011)          | 1431   | 20  | -  | -  | -  | -   | 0   | 1                             | -            | 4.50        | 1.14 | 6440  | 0.31  | F5   | 5.1    |     |
| Piubello et al (2014)        | 58     | 0   | 5  | 4  | -  | -   | 9   | 2                             | -            | -           | -    | 107   | 0.00  | F5   | 118    |     |
| Prasad et al (2004)          | 29     | 2   | -  | -  | -  | -   | 4   | 4                             | 31-Apr- 2004 | -           | 1.33 | -     | 39    | 5.33 | F5     | 285 |
| Prasad et al (2008)          | 212    | 11  | -  | -  | -  | -   | 0   | 1                             | -            | -           | -    | 207   | 5.17  | F5   | 285.00 |     |
| Pulido et al (1997)          | 189    | 15  | -  | -  | -  | -   | 0   | -                             | -            | 2.63        | -    | 556   | 2.70  | F1   | 17.5   |     |
| Reis et al (1990)            | 117.00 | 0   | -  | -  | -  | -   | 0   | 4.5                           | -            | 1.78        | -    | 209   | 0.00  | F5   | 69.50  |     |
| Seon et al (2014)            | 12     | 0   | -  | -  | -  | -   | 0   | 2                             | -            | 1.25        | -    | 15    | 0.00  | F5   | 88     |     |
| Shen et al (2017)            | 13417  | 710 | -  | -  | -  | -   | 0   | 1                             | -            | -           | 1.30 | 94040 | 0.76  | F5   | 89     |     |
| Shin et al (2006)            | 86     | 1   | 2  | 0  | 0  | 0   | 2   | 4 years after treatment start | -            | 3.83        | -    | 330   | 0.30  | F5   | 183    |     |
| Slutkin et al (1988)         | 197    | 4   | 4  | 11 | 54 | 16  | 85  | 1                             | -            | -           | -    | 153   | 2.62  | F5   | 9.3    |     |
| Sonnenberg et al (2001)      | 326    | 65  | -  | -  | -  | -   | 0   | 31-Dec- 1998                  | 629          | 2.09        | -    | 629   | 10.33 | F5   | 216    |     |
| Spagnolo et al (1982)        | 49     | 0   | 4  | -  | -  | 5   | 9   | 2                             | -            | -           | -    | 89    | 0.00  | F5   | 10.9   |     |
| Sun et al (2017)             | 234    | 69  | -  | -  | -  | -   | 0   | 9                             | -            | -           | 5.7  | 1971  | 3.50  | F5   | 71.10  |     |
| Suryanto et al (2008)        | 344    | 12  | 29 | -  | -  | 143 | 172 | -                             | 815          | -           | 4.30 | 815   | 1.47  | F5   | 363.00 |     |
| Swaminathan et al (2008)     | 31     | 12  | 7  | -  | -  | -   | 7   | 2                             | -            | -           | -    | 43    | 27.91 | F5   | 289    |     |
| Thomas et al (2005)          | 534    | 62  | 8  | 16 | -  | 7   | 31  | 1.5                           | -            | -           | -    | 732   | 8.48  | F5   | 289.00 |     |
| Thomas et al (2019)          | 455    | 20  | 21 | -  | -  | 40  | 61  | 2                             | 623          | 1.50        | -    | 623   | 3.21  | F5   | 211    |     |
| Van der Heijden et al (2018) | 3004   | 228 | -  | -  | -  | -   | 0   | 31-Dec-2013                   | -            | 3.00        | -    | 9012  | 2.53  | F5   | 963    |     |

|                         |        |     |     |    |    |     |     |              |      |      |      |          |       |    |        |
|-------------------------|--------|-----|-----|----|----|-----|-----|--------------|------|------|------|----------|-------|----|--------|
| Van Deun et al (2006)   | 15436  | 317 | -   | -  | -  | -   | 0   | 2            | -    | -    | -    | 30555    | 1.04  | F5 | 221.00 |
| Van Deun et al (2010)   | 335    | 3   | 12  | 12 | -  | 0   | 24  | 2            | -    | -    | -    | 643      | 0.47  | F3 | 221    |
| Velayutham et al (2018) | 1210   | 158 | -   | -  | -  | 102 | 102 | 1            | -    | -    | -    | 1244     | 12.70 | F4 | 211    |
| Vree et al (2007)       | 304.00 | 21  | 19  | 17 | 10 | 14  | 60  | -            | -    | 1.62 | 0.67 | 492      | 4.27  | F5 | 27.90  |
| Wang et al (2015)       | 508    | 18  | -   | -  | -  | -   | 0   | 2            | 860  | -    | -    | 860      | 2.09  | F5 | 65.00  |
| Westerlund et al (2015) | 710    | 58  | -   | -  | -  | 67  | 67  | 10           | -    | 7.70 | -    | 6632     | 0.87  | F1 | 122    |
| Wu et al (2015)         | 196    | 7   | -   | -  | -  | -   | 0   | 5            | -    | -    | -    | 963      | 0.73  | F1 | 27.90  |
| Xia et al (2014)        | 935    | 31  | -   | -  | -  | -   | -   | 4.0          | -    | -    | -    | 3678     | 0.84  | F5 | 67.00  |
| Yen et al (2014)        | 5567   | 84  | 914 | -  | -  | -   | 914 | 6            | 1716 | -    | -    | 17166    | 0.49  | F1 | 86.00  |
| Yoshiyama et al (2010)  | 170    | 5   | 3   | 31 | -  | 15  | 49  | 1.           | -    | -    | -    | 191      | 2.62  | F5 | 163.00 |
| Yoshiyama et al (2014)  | 168    | 3   | 4   | -  | -  | -   | 4   | -            | -    | 4.40 | 1.10 | 739      | 0.41  | F5 | 36.00  |
| Zhdanov et al (2017)    | 3515   | 37  | -   | -  | -  | -   | 0   | 31/Dec/ 2011 | 2380 | -    | 2.60 | 23805    | 0.16  | F5 | 7.60   |
| Anaam et al (2019)      | 814    | 71  | 28  |    |    | 35  | 63  | 5            |      |      |      | 3735.00  | 1.90  | F5 | 48.00  |
| Anh et al (2020)        | 79     | 0   |     |    |    |     | 0   | 2            |      |      |      | 158.00   | 0.00  | F5 | 188.00 |
| Ciza et al (2020)       | 209    | 1   |     |    |    |     | 0   | 2            |      | 1.07 | 0.5  | 224.68   | 0.45  | F4 | 111.00 |
| Decro et al (2020)      | 773    | 9   |     |    |    |     |     | 2            |      |      |      | 1537.00  | 0.59  | F5 | 221.00 |
| Lee et al (2020)        | 60     | 3   |     |    |    |     | 0   | 1            |      | 1.32 | 3.14 | 79.00    | 3.80  | F4 | 146.00 |
| Liu et al (2020)        | 4043   | 275 |     |    |    |     | 0   | 3            |      |      |      | 11716.50 | 2.35  | F5 | 67.00  |
| Malherbe et al (2020)   | 88     | 12  |     |    |    | NO  | 0   | 2            |      |      |      | 164.00   | 7.32  | F5 | 147.00 |
| Mathur et al (2020)     | 187    | 7   | 15  |    |    |     | 15  | 2            |      | 1.09 |      | 352.63   | 1.99  | F4 | 204.00 |
| Park et al (2019)       | 35     | 1   | 1   |    |    |     | 1   | 2            |      | 3.47 |      | 121.33   | 0.82  | F2 | 99.00  |
| Peetluk et al (2019)    | 517    | 5   |     |    |    |     | 0   | 1.5          |      |      |      | 771.75   | 0.65  | F5 | 43.00  |
| Piubello et al (2020)   | 211    | 5   | 7   |    |    | 20  | 27  | 1            |      |      | 0.20 | 193.51   | 2.58  | F4 | 105.00 |
| Schwöebel et al (2020)  | 823    | 15  | 51  |    |    | 205 | 256 | 2            |      | 1.32 | 0.69 | 1132.08  | 1.33  | F3 | 183.78 |
| Zheng et al (2020)      | 35     | 10  | 4   |    |    | 2   | 6   | 5            |      |      | 2    | 130.00   | 7.69  | F4 | 70.00  |
| Bhatt et al (2017)      | 93     | 2   |     |    |    |     |     |              |      |      |      | 207.70   | 0.96  | F1 | 244.00 |

\*Formulas detailed in Appendix 3

Table S2: Proportion of relapses and reinfections in cohort studies, clinical trials and TB program database studies

| Author                                     | Genotyping molecular technique *                                     | Recurrences | Recurrences with fingerprint results N (%) | Relapse N (%) | Reinfection N (%) | Background incidence per 100,000 pop** | Follow up period in years | HIV-prevalence |
|--------------------------------------------|----------------------------------------------------------------------|-------------|--------------------------------------------|---------------|-------------------|----------------------------------------|---------------------------|----------------|
| Clinical trials                            |                                                                      |             |                                            |               |                   |                                        |                           |                |
| Conradie et al (2020)                      | WGS                                                                  | 2           | 1 (50)                                     | 1 (100)       | 0 (0)             | 146                                    | 0.49                      | 19.3           |
| El-Sadr et al (1998)                       | RFLP                                                                 | 2           | 1 (50)                                     | 1(100)        | 0                 | 9.2                                    | > 2                       | 0.4            |
| Jasmer Lorna et al (2004)                  | RFLP, Polymorphic guanine-cytosine-rich sequence-based RFLP analysis | 81          | 75 (93)                                    | 72 (96)       | 3 (4)             | 6.7                                    | 2                         | 0.4            |
| Maug et al (2020)                          | Spoligotyping, MIRU VNTR, Deeplex MycTB                              | 5           | 4 (80)                                     | 1 (25)        | 3 (75)            | 221                                    | 1                         | <1             |
| Merle et al (2014)                         | MIRU VNTR                                                            | 148         | 77 (52)                                    | 61 (79)       | 16 (21)           | 820                                    | 2                         | >1             |
| Cohort studies                             |                                                                      |             |                                            |               |                   |                                        |                           |                |
| Aung et al (2014)                          | Spoligotyping, MIRU VNTR                                             | 6           | 6 (100)                                    | 4(66)         | 2(33)             | 221                                    | >2                        | <0.5           |
| Charalambous et al (2008)                  | RFLP                                                                 | 42          | 16 (38)                                    | 5 (31)        | 11 (67)           | 585                                    | 1.02                      | 14.65          |
| Crampin et al (2010)                       | RFLP, Spoligotyping                                                  | 53          | 39 (74)                                    | 26 (67)       | 13 (33)           | 392                                    | 10.75                     | 14             |
| Dale et al (2017)                          | MIRU VNTR                                                            | 20          | 11 (55)                                    | 9 (82)        | 2 (18)            | 6.5                                    | 5.7                       | 0.1            |
| Decroo et al (2020)                        | Spoligotyping, MIRU VNTR, SNP genotyping                             | 8           | 7 (87)                                     | 4 (57)        | 3 (43)            | 228                                    | 1.5                       | 0.3            |
| Guerra-Assunção et al (2015)               | RFLP, Spoligotyping, WGS                                             | 139         | 75 (54)                                    | 55 (73)       | 20 (27)           | 397                                    | 2                         | 14             |
| Hawken et al (1993)                        | RFLP                                                                 | 11          | 3 (27)                                     | 2 (67)        | 1 (33)            | 72.3                                   | 1.25                      | 5.5            |
| Hesseling et al (2010)                     | RFLP                                                                 | 22          | 18 (82)                                    | 12 (67)       | 6 (33)            | 841                                    | 2                         | 12.7           |
| Huyen et al (2013)                         | Spoligotyping                                                        | 35          | 35 (100)                                   | 23 (66)       | 12 (34)           | 172                                    | 1.5                       | 0.4            |
| Jimenez Corona et al (2013)                | RFLP, Spoligotyping                                                  | 74          | 38 (51)                                    | 31 (82)       | 7 (18)            | 21                                     | 5.14                      | 0.3            |
| Johnson et al (2000)                       | RFLP                                                                 | 4           | 4 (100)                                    | 0             | 4 (100)           | 117                                    | 2                         | 9.5            |
| Johnson et al (2003)                       | RFLP                                                                 | 2           | 2 (100)                                    | 0             | 2 (100)           | 248                                    | 6                         | 9.5            |
| Liu et al (2020)                           | MIRU VNTR                                                            | 275         | 58 (21)                                    | 18 (31)       | 40 (69)           | 67.00                                  | 3                         | <0.1           |
| Luzze et al (2013)                         | RFLP                                                                 | 171         | 98 (57)                                    | 80 (82)       | 18 (18)           | 400                                    | 1.24                      | 6.5            |
| Marx et al (2014) / Dippenaar et al (2019) | RFLP. / WGS                                                          | 203         | 130(64)                                    | 39(30)        | 91(70)            | 746                                    | >2                        | 14             |

|                                     |                                                                               |     |          |          |         |       |      |      |
|-------------------------------------|-------------------------------------------------------------------------------|-----|----------|----------|---------|-------|------|------|
| Nahid et al (2007)                  | RFLP                                                                          | 16  | 11 (69)  | 11 (100) | 0 (0)   | 8.7   | 1    | 0.4  |
| Narayanan et al (2010)              | RFLP, Spoligotyping, MIRU VNTR                                                | 74  | 48(65)   | 24(50)   | 24(50)  | 285   | >2   | 0.1  |
| Nettles et al (2004)                | RFLP                                                                          | 14  | 9 (64)   | 9 (100)  | 0 (0)   | 7.9   | 1    | 0.4  |
| Pettit et al (2011)                 | RFLP, Spoligotyping, MIRU VNTR                                                | 20  | 15 (75)  | 12 (80)  | 3 (20)  | 5.1   | 1    | 0.4  |
| Piubello et al (2020)               | No specified                                                                  | 5   | 5 (100)  | 1 (20)   | 4 (80)  | 105   | 0.92 | 0.3  |
| Schwœbel et al (2020)               | WGS, Spoligotyping                                                            | 15  | 3 (20)   | 1 (33)   | 2 (66)  | 183   | 2    | 1.1  |
| Shen et al (2017)                   | MIRU VNTR                                                                     | 710 | 141 (20) | 82 (58)  | 59 (42) | 89    | 1    | 0.1  |
| Sonnenberg et al (2001)             | RFLP                                                                          | 65  | 39 (60)  | 25 (64)  | 14 (36) | 216   | 2.09 | 7.1  |
| Van Deun et al (2004)               | RFLP                                                                          | 2   | 2 (100)  | 1 (50)   | 1 (50)  | 52.9  | 2    | <1   |
| Van Deun et al (2010)               | Spoligotyping                                                                 | 3   | 3 (100)  | 1 (33)   | 2 (66)  | 221   | 2    | <0.5 |
| Velayutham et al (2018)             | MIRU VNTR                                                                     | 123 | 60 (48)  | 56 (93)  | 4 (7)   | 211   | 1    | <0.5 |
| TB program databases                |                                                                               |     |          |          |         |       |      |      |
| Bandera et al (2001)                | RFLP, Spoligotyping                                                           | 32  | 32 (60)  | 27 (84)  | 5 (16)  | 17.5  | 5    | 0.2  |
| Cacho et al (2007)                  | RFLP, Spoligotyping, MIRU VNTR                                                | 8   | 8 (100)  | 7 (88)   | 1 (13)  | 25.7  | 6    | 0.4  |
| Caminero et al (2001)               | RFLP                                                                          | 11  | 8 (73)   | 2 (25)   | 6 (75)  | 22    | 5    | 0.4  |
| Das et al (1993)                    | RFLP                                                                          | 42  | 42 (100) | 37 (88)  | 5 (12)  | 109.3 | 2    | 0.2  |
| Das et al (1995)                    | RFLP                                                                          | 62  | 62 (100) | 22 (35)  | 40 (65) | 130.7 | 3    | 0.2  |
| Dobler et al (2009)                 | RFLP, Spoligotyping, MIRU VNTR                                                | 15  | 15 (100) | 11 (73)  | 4 (27)  | 6.3   | 12   | 0.1  |
| El Sahly et al (2004)               | RFLP, Spoligotyping, genotyping method Not specified                          | 100 | 25 (25)  | 19 (76)  | 6 (24)  | 2.9   | 5    | 0.4  |
| Folkvardsen et al (2020)            | WGS                                                                           | 32  | 13       | 9        | 4       | 8.3   | 22   | 0.1  |
| Lourenço et al (2000)               | RFLP, Polymorphic guanine-cytosine-rich sequence-based RFLP analysis, DRE-PCR | 12  | 12 (100) | 9 (75)   | 3 (25)  | 55.9  | 4    | 0.3  |
| Parvaresh et al (2018)              | MIRU VNTR, WGS                                                                | 18  | 15(83)   | 13(87)   | 2(13)   | 6.3   | 6    | 0.1  |
| Quy et al (2002) / Lan et al (2003) | RFLP                                                                          | 168 | 50 (30)  | 39 (78)  | 11 (22) | 68    | 2    | 0.2  |
| Rosser et al (2018)                 | MIRU VNTR                                                                     | 82  | 19(23)   | 16(84)   | 3(16)   | 13    | 20   | 0.16 |
| Schiroli et al (2015)               | Spoligotyping, MIRU VNTR                                                      | 83  | 83 (100) | 64 (77)  | 19 (23) | 8.6   | 15   | 0.3  |



|                       |                                |     |          |         |         |      |   |      |
|-----------------------|--------------------------------|-----|----------|---------|---------|------|---|------|
| Shamputa et al (2007) | RFLP, Spoligotyping, MIRU VNTR | 35  | 35 (100) | 30 (86) | 5 (14)  | 221  | 7 | <1   |
| Shen et al (2006)     | RFLP, MIRU VNTR                | 202 | 52 (26)  | 20 (39) | 32 (62) | 102  | 5 | 0.1  |
| Umubyeyi et al (2007) | Spoligotyping, MIRU VNTR       | 13  | 13 (100) | 8 (62)  | 4 (31)  | 92   | 3 | 3.9  |
| Van Rie et al (1999)  | RFLP                           | 48  | 16 (33)  | 4 (25)  | 12 (75) | 1000 | 6 | 15.9 |

\*RFLP= IS6110-restriction fragment length polymorphism, MIRU VNTR= mycobacterial interspersed repetitive unit-variable number tandem repeat typing; WGS: Whole Genome Sequencing

\*\*Estimated incidence of tuberculosis for all cases as estimated the World Health Organization and reported in the Global Tuberculosis Database[16]

## Appendix 7 Quality Assessment

Table S3 Recurrent TB incidence rate: Quality Assessment according to the modified NewCastle Ottawa Scale

| Title                     | Selection                            |                           | Outcome               |                     |                                  | Score     |         | Overall quality Rating |
|---------------------------|--------------------------------------|---------------------------|-----------------------|---------------------|----------------------------------|-----------|---------|------------------------|
|                           | Representativeness of the population | Ascertainment of exposure | Assessment of outcome | Length of follow up | Adequacy of follow-up of cohorts | Selection | Outcome |                        |
| Anaam et al (2012)        | A                                    | B                         | A                     | B                   | B                                | 1         | 1       | POOR                   |
| Anaam et al (2019)        | A                                    | A                         | B                     | A                   | B                                | 2         | 2       | FAIR                   |
| Anh et al (2020)          | C                                    | B                         | B                     | A                   | A                                | 0         | 2       | POOR                   |
| Aung et al (2014)         | C                                    | B                         | A                     | A                   | A                                | 0         | 2       | POOR                   |
| Banu et al (2012)         | A                                    | A                         | A                     | A                   | A                                | 2         | 3       | GOOD                   |
| Becerra et al (2010)      | C                                    | A                         | A                     | A                   | B                                | 1         | 2       | FAIR                   |
| Bechan et al (1997)       | A                                    | A                         | A                     | B                   | A                                | 2         | 2       | FAIR                   |
| Bhatt et al (2017)        | B                                    | B                         | A                     | A                   | A                                | 1         | 2       | FAIR                   |
| Cao et al (1988)          | A                                    | A                         | A                     | A                   | A                                | 2         | 3       | GOOD                   |
| Castelo et al (1989)      | A                                    | B                         | A                     | B                   | D                                | 1         | 0       | POOR                   |
| Chaisson et al (1996)     | A                                    | A                         | A                     | A                   | A                                | 2         | 3       | GOOD                   |
| Chang et al (2004)        | A                                    | A                         | B                     | A                   | A                                | 2         | 2       | FAIR                   |
| Charalambous et al (2008) | B                                    | A                         | B                     | A                   | A                                | 2         | 2       | FAIR                   |
| Chaulet et al (1995)      | A                                    | A                         | A                     | A                   | B                                | 2         | 3       | GOOD                   |
| Chiang et al (2006)       | C                                    | A                         | A                     | A                   | A                                | 1         | 2       | FAIR                   |
| Chien et al (2014)        | C                                    | B                         | A                     | A                   | A                                | 0         | 2       | POOR                   |
| Choi et al (2014)         | A                                    | A                         | A                     | A                   | B                                | 2         | 3       | GOOD                   |
| Ciza et al (2020)         | C                                    | A                         | A                     | A                   | A                                | 1         | 2       | FAIR                   |
| Cohn et al (1990)         | A                                    | B                         | A                     | A                   | D                                | 1         | 1       | POOR                   |
| Connolly et al (1999)     | A                                    | A                         | A                     | B                   | A                                | 2         | 2       | FAIR                   |

|                                |   |   |   |   |   |   |   |      |
|--------------------------------|---|---|---|---|---|---|---|------|
| Conradie et al (2020)          | C | A | A | B | B | 1 | 1 | POOR |
| Cowie et al (1989)             | B | A | B | A | A | 2 | 2 | FAIR |
| Crampin et al (2010)           | A | A | B | A | A | 2 | 2 | FAIR |
| d'Arc et al (2008)             | A | B | A | A | A | 1 | 2 | FAIR |
| Dale et al (2017)              | A | B | A | B | A | 1 | 1 | POOR |
| Dangisso et al (2018)          | B | B | A | A | A | 1 | 2 | FAIR |
| Datiko et al (2009)            | A | A | A | A | A | 2 | 3 | GOOD |
| Decro et al (2020)             | C | B | A | A | A | 0 | 2 | POOR |
| Dobler et al (2009)            | A | B | A | B | A | 1 | 1 | POOR |
| Dornelles et al (2007)         | A | A | A | A | A | 2 | 3 | GOOD |
| Dutt et al (1984)              | A | A | A | A | A | 2 | 3 | GOOD |
| Dutt et al (1990)              | A | A | A | A | A | 2 | 3 | GOOD |
| East African/BMRC (1980)       | A | A | B | A | B | 2 | 2 | FAIR |
| East African/BMRC (1981)       | A | A | A | B | B | 2 | 2 | FAIR |
| Escudero et al (2006)          | C | A | A | A | A | 1 | 2 | FAIR |
| Fitzgerald et al (2000)        | A | A | B | A | A | 2 | 2 | FAIR |
| Fox et al (2018)               | A | B | A | A | A | 1 | 2 | FAIR |
| Garcia Martinez et al (1996)   | A | A | A | A | B | 2 | 3 | GOOD |
| Gelmanova et al (2015)         | C | B | A | A | B | 0 | 2 | POOR |
| Gengiah et al (2014)           | C | B | A | A | A | 0 | 2 | POOR |
| Glynn et al (2010)             | B | B | B | A | A | 1 | 2 | FAIR |
| Gonzalez-Montaner et al (1994) | A | A | A | A | C | 2 | 2 | FAIR |
| Gopalan et al (2018)           | C | A | A | B | B | 1 | 1 | POOR |
| Guerra-Assunção et al (2015)   | A | B | A | A | B | 1 | 2 | FAIR |
| Guglielmetti et al (2016)      | C | B | A | A | C | 0 | 1 | POOR |

|                                     |   |   |   |   |   |   |   |      |
|-------------------------------------|---|---|---|---|---|---|---|------|
| Hang et al (2015)                   | A | A | A | B | B | 2 | 2 | FAIR |
| Hawken et al (1993)                 | C | A | A | A | A | 1 | 2 | FAIR |
| He et al (2010)                     | C | B | A | A | B | 0 | 2 | POOR |
| Hesseling et al (2010)              | B | B | A | A | B | 1 | 2 | FAIR |
| Hong et al (1988)                   | C | A | A | A | C | 1 | 1 | POOR |
| Hong Kong Chest Service (1982)      | A | A | A | B | B | 2 | 2 | FAIR |
| Hong Kong Chest Service/BMRC (1991) | A | A | A | A | B | 2 | 3 | GOOD |
| Houben et al (2012)                 | C | B | A | A | B | 0 | 2 | POOR |
| Huyen et al (2013)                  | A | A | A | B | B | 2 | 2 | FAIR |
| Jasmer et al (2004)                 | A | B | A | B | B | 1 | 1 | POOR |
| Jasmer Lorna et al (2004)           | A | B | A | A | A | 1 | 2 | FAIR |
| Jawahar et al (2013)                | A | A | B | A | A | 2 | 2 | FAIR |
| Jimenez Corona et al (2013)         | A | B | A | A | A | 1 | 2 | FAIR |
| Jo et al (2014)                     | A | B | B | B | A | 1 | 1 | POOR |
| Johnson et al (2000)                | A | A | A | A | A | 2 | 3 | GOOD |
| Johnson et al (2003)                | A | B | A | B | A | 1 | 1 | POOR |
| Johnson et al (2009)                | A | B | B | A | B | 1 | 2 | FAIR |
| Karagaoz et al (2009)               | C | A | A | A | B | 1 | 2 | FAIR |
| Kassim et al (1995)                 | B | A | A | B | A | 2 | 2 | FAIR |
| Kennedy et al (1996)                | A | B | B | B | A | 1 | 1 | POOR |
| Kenyan/Zambian/BMRC (1989)          | A | A | A | A | B | 2 | 3 | GOOD |
| Kim et al (2017)                    | A | B | A | B | D | 1 | 0 | POOR |
| Kohno et al (1992)                  | A | A | A | A | B | 2 | 3 | GOOD |
| Kuaban et al (2015)                 | C | B | A | B | B | 0 | 1 | POOR |

|                              |   |   |   |   |   |   |   |      |
|------------------------------|---|---|---|---|---|---|---|------|
| Lawal et al (2019)           | A | B | A | B | A | 1 | 1 | POOR |
| Lee et al (2011)             | C | B | B | A | A | 0 | 2 | POOR |
| Lee et al (2012)             | C | A | A | A | A | 1 | 2 | FAIR |
| Lee et al (2014)             | C | B | A | B | A | 0 | 1 | POOR |
| Lee et al (2015)             | C | B | A | B | A | 0 | 1 | POOR |
| Lee et al (2020)             | C | B | A | B | A | 0 | 1 | POOR |
| Liu et al (2020)             | A | A | B | A | A | 2 | 2 | FAIR |
| Luzze et al (2013)           | B | A | A | B | A | 2 | 2 | FAIR |
| Ma et al (2018)              | C | B | A | A | A | 0 | 2 | POOR |
| Madras/BMRC (1989)           | C | B | A | A | B | 0 | 2 | POOR |
| Malherbe et al (2020)        | A | A | A | A | D | 2 | 2 | FAIR |
| Mathur et al (2020)          | A | A | B | A | A | 2 | 2 | FAIR |
| Maug et al (2020)            | A | B | A | B | B | 1 | 1 | POOR |
| McGreevy et al (2012)        | C | B | A | A | B | 0 | 2 | POOR |
| Merle et al (2014)           | A | A | A | A | B | 2 | 3 | GOOD |
| Migliori et al (2002)        | C | A | B | B | A | 1 | 1 | POOR |
| Mohanty et al (1993)         | A | A | A | A | A | 2 | 3 | GOOD |
| Moreno-Martinez et al (2007) | A | A | A | B | A | 2 | 2 | FAIR |
| Nahid et al (2007)           | C | A | A | A | C | 1 | 1 | POOR |
| narayanan et al (2007) trial | A | A | A | A | A | 2 | 3 | GOOD |
| Nettles et al (2004)         | A | A | A | B | A | 2 | 2 | FAIR |
| Nolan et al (2002)           | C | C | B | A | D | 0 | 1 | POOR |
| Palmero et al (2004)         | C | A | A | B | A | 1 | 1 | POOR |
| Park et al (2019)            | C | B | B | A | A | 0 | 2 | POOR |
| Parthasarathy et al (1991)   | A | A | A | B | A | 2 | 2 | FAIR |

|                           |   |   |   |   |   |   |   |      |
|---------------------------|---|---|---|---|---|---|---|------|
| Peetluk et al (2019)      | A | B | B | B | A | 1 | 1 | POOR |
| Perez-Guzman et al (2002) | C | A | A | A | C | 1 | 1 | POOR |
| Perriens et al (1991)     | A | A | A | B | B | 2 | 2 | FAIR |
| Perriens et al (1995)     | A | A | A | B | C | 2 | 1 | POOR |
| Pettit et al (2011)       | A | A | A | A | A | 2 | 3 | GOOD |
| Piubello et al (2014)     | C | B | A | A | A | 0 | 2 | POOR |
| Piubello et al (2020)     | C | B | A | B | B | 0 | 1 | POOR |
| Prasad et al (2004)       | C | A | A | B | B | 1 | 1 | POOR |
| Prasad et al (2008)       | A | B | A | B | A | 1 | 1 | POOR |
| Pulido et al (1997)       | C | A | A | A | A | 1 | 2 | FAIR |
| Reis et al (1990)         | C | A | A | A | A | 1 | 2 | FAIR |
| Schwœbel et al (2020)     | C | B | A | A | C | 0 | 1 | POOR |
| Seon et al (2014)         | B | B | A | A | A | 1 | 2 | FAIR |
| Shen et al (2017)         | A | B | A | A | A | 1 | 2 | FAIR |
| Shin et al (2006)         | C | B | A | A | A | 0 | 2 | POOR |
| Singapore/BMRC (1988)     | A | A | B | A | B | 2 | 2 | FAIR |
| Singapore/BMRC (1991)     | A | A | A | B | A | 2 | 2 | FAIR |
| Slutkin et al (1988)      | A | B | A | B | B | 1 | 1 | POOR |
| Snider et al (1984)       | A | A | A | A | D | 2 | 2 | FAIR |
| Sonnenberg et al (2001)   | C | A | A | A | A | 1 | 2 | FAIR |
| Spagnolo et al (1982)     | A | B | A | A | B | 1 | 2 | FAIR |
| Su et al (2001)           | A | B | B | A | D | 1 | 1 | POOR |
| Sun et al (2017)          | C | B | A | A | A | 0 | 2 | POOR |
| Suryanto et al (2008)     | A | A | A | A | C | 2 | 2 | FAIR |
| Swai et al (1988)         | C | A | A | A | B | 1 | 2 | FAIR |

|                                     |   |   |   |   |   |   |   |      |
|-------------------------------------|---|---|---|---|---|---|---|------|
| Swaminathan et al (2008)            | C | A | B | A | A | 1 | 2 | FAIR |
| Tam et al (2002)                    | A | C | A | A | B | 1 | 2 | FAIR |
| Tanzania/BMRC (1985)                | A | A | A | A | B | 2 | 3 | GOOD |
| Teo et al (1999)                    | A | B | A | A | B | 1 | 2 | FAIR |
| Thomas et al (2005)                 | A | A | A | B | B | 2 | 2 | FAIR |
| Thomas et al (2019)                 | A | A | B | A | B | 2 | 2 | FAIR |
| Tuberculosis Research Centre (1981) | A | A | A | A | A | 2 | 3 | GOOD |
| Tuberculosis Research Centre (1997) | A | A | A | A | B | 2 | 3 | GOOD |
| Van der Heijden et al (2018)        | A | A | A | A | A | 2 | 3 | GOOD |
| Van Deun et al (2006)               | A | B | A | A | A | 1 | 2 | FAIR |
| Van Deun et al (2010)               | C | B | A | A | A | 0 | 2 | POOR |
| Velayutham et al (2018)             | A | A | A | B | B | 2 | 2 | FAIR |
| Velayutham et al (2020)             | A | A | B | A | A | 2 | 2 | FAIR |
| Vree et al (2007)                   | A | B | A | B | B | 1 | 1 | POOR |
| Wang et al (2015)                   | C | B | A | A | A | 0 | 2 | POOR |
| Westerlund et al (2015)             | A | A | A | A | B | 2 | 3 | GOOD |
| Wu et al (2016)                     | A | B | A | B | A | 1 | 1 | POOR |
| Wu et al (2015)                     | A | B | A | A | A | 1 | 2 | FAIR |
| Xia et al (2014)                    | A | B | B | A | A | 1 | 2 | FAIR |
| Yan et al (2018)                    | C | B | B | A | C | 0 | 1 | POOR |
| Yen et al (2014)                    | A | B | B | A | A | 1 | 2 | FAIR |
| Yoshiyama et al (2010)              | C | A | A | B | B | 1 | 1 | POOR |
| Yoshiyama et al (2014)              | C | A | A | A | A | 1 | 2 | FAIR |

|                      |   |   |   |   |   |   |   |      |
|----------------------|---|---|---|---|---|---|---|------|
| Zhdanov et al (2017) | A | B | A | A | A | 1 | 2 | FAIR |
| Zheng et al (2020)   | A | B | B | A | B | 1 | 2 | FAIR |
| Zierski et al (1981) | A | A | A | A | B | 2 | 3 | GOOD |

\*Each item received a maximum of one star according scale shown in Appendix 07. Score quality rating based on total number of stars received: Good quality: 2 in selection domain AND 3 in outcome domain. Fair quality: 1 star in selection domain OR 2 stars in outcome domain. Poor quality: If 0 stars in selection criteria OR 0-1 stars in outcome criteria



Table S4: Proportion of relapses and reinfections: Quality Assessment according to the modified NewCastle Ottawa Scale

| Title                        | Selection                        | Outcome                   | Selection             | Outcome             | Selection          | Scores    |         | Overall Quality Rating |
|------------------------------|----------------------------------|---------------------------|-----------------------|---------------------|--------------------|-----------|---------|------------------------|
|                              | Representativeness of population | Ascertainment of exposure | Assessment of outcome | Length of follow up | Lost to genotyping | Selection | Outcome |                        |
| Aung et al (2014)            | C                                | B                         | A                     | A                   | A                  | 0         | 3       | POOR                   |
| Bandera et al (2001)         | A                                | A                         | B                     | A                   | A                  | 2         | 3       | GOOD                   |
| Cacho et al (2007)           | B                                | A                         | A                     | A                   | A                  | 2         | 3       | GOOD                   |
| Caminero et al (2001)        | A                                | A                         | C                     | A                   | B                  | 2         | 1       | POOR                   |
| Charalambous et al (2008)    | B                                | A                         | C                     | B                   | B                  | 2         | 0       | POOR                   |
| Conradie et al (2020)        | C                                | A                         | A                     | B                   | B                  | 1         | 1       | POOR                   |
| Crampin et al (2010)         | A                                | A                         | B                     | A                   | B                  | 2         | 2       | FAIR                   |
| Dale et al (2017)            | A                                | B                         | A                     | A                   | B                  | 1         | 2       | FAIR                   |
| Das et al (1993)             | C                                | A                         | C                     | A                   | A                  | 1         | 2       | FAIR                   |
| Das et al (1995)             | B                                | A                         | C                     | A                   | A                  | 2         | 2       | FAIR                   |
| Decro et al (2020)           | C                                | B                         | A                     | B                   | B                  | 0         | 1       | POOR                   |
| Dobler et al (2009)          | A                                | B                         | A                     | A                   | A                  | 1         | 3       | FAIR                   |
| El Sahly et al (2004)        | B                                | A                         | B                     | A                   | B                  | 2         | 2       | FAIR                   |
| El-Sadr et al (1998)         | B                                | B                         | C                     | A                   | B                  | 1         | 1       | POOR                   |
| Folkvardsen et al (2020)     | B                                | A                         | A                     | A                   | B                  | 2         | 2       | FAIR                   |
| Guerra-Assunção et al (2015) | A                                | B                         | A                     | A                   | B                  | 1         | 2       | FAIR                   |
| Hawken et al (1993)          | C                                | A                         | C                     | B                   | B                  | 1         | 0       | POOR                   |
| Hesseling et al (2010)       | B                                | B                         | C                     | A                   | B                  | 1         | 1       | POOR                   |
| Huyen et al (2013)           | A                                | A                         | C                     | B                   | A                  | 2         | 1       | POOR                   |
| Jasmer Lorna et al (2004)    | A                                | B                         | A                     | A                   | A                  | 1         | 3       | FAIR                   |

|                                           |   |   |   |   |   |   |   |      |
|-------------------------------------------|---|---|---|---|---|---|---|------|
| Jimenez Corona et al (2013)               | A | B | B | A | B | 1 | 2 | FAIR |
| Johnson et al (2000)                      | A | A | C | A | B | 2 | 1 | POOR |
| Johnson et al (2003)                      | A | B | C | A | A | 1 | 2 | FAIR |
| Liu et al (2020)                          | A | A | A | A | B | 2 | 2 | FAIR |
| Lourenço et al (2000)                     | C | B | B | A | A | 0 | 3 | POOR |
| Luzze et al (2013)                        | A | A | C | B | B | 2 | 0 | POOR |
| Marx et al (2014) / Dippenar et al (2019) | B | A | A | A | B | 2 | 2 | FAIR |
| Maug et al (2020)                         | A | B | A | B | B | 1 | 1 | POOR |
| Merle et al (2014)                        | A | A | A | A | B | 2 | 2 | FAIR |
| Nahid et al (2007)                        | C | A | C | B | B | 1 | 0 | POOR |
| Narayanan et al (2010)                    | A | A | A | A | B | 2 | 2 | FAIR |
| Nettles et al (2004)                      | A | A | C | B | B | 2 | 0 | POOR |
| Parvaresh et al (2018)                    | B | A | A | A | B | 2 | 2 | FAIR |
| Pettit et al (2011)                       | A | A | A | B | B | 2 | 1 | POOR |
| Piubello et al (2020)                     | C | B | D | B | A | 0 | 1 | POOR |
| Quy et al (2002) / Nguyen et al (2003)    | B | A | C | A | B | 2 | 1 | POOR |
| Rosser et al (2018)                       | B | A | A | A | B | 2 | 2 | FAIR |
| Schirotti et al (2015)                    | A | A | A | A | A | 2 | 3 | GOOD |
| Schwæbel et al (2020)                     | C | B | A | A | B | 0 | 2 | POOR |
| Shamputa et al (2007)                     | A | B | A | A | A | 1 | 3 | FAIR |
| Shen et al (2006)                         | A | B | A | A | B | 1 | 2 | FAIR |
| Shen et al (2017)                         | A | B | A | A | B | 1 | 2 | FAIR |
| Sonnenberg et al (2001)                   | C | A | C | A | B | 1 | 1 | POOR |
| Umubyeyi et al (2007)                     | A | A | A | A | A | 2 | 3 | GOOD |

|                         |   |   |   |   |   |   |   |      |
|-------------------------|---|---|---|---|---|---|---|------|
| Van Deun et al (2004)   | B | B | C | A | A | 1 | 2 | FAIR |
| Van Deun et al (2010)   | C | B | C | A | A | 0 | 2 | POOR |
| VanRie et al (1999)     | A | B | C | A | B | 1 | 1 | POOR |
| Velayutham et al (2018) | A | A | A | B | B | 2 | 1 | POOR |

\*Each item received a maximum of one star according scale shown in Appendix 07. Score quality rating based on total number of stars received: Good quality: 2 in selection AND 3 in outcome. Fair quality: 1 star in selection OR 2 stars in outcome. Poor quality: 0 stars in selection OR 0-1 stars in outcome



















Figure S9 Funnel plot Recurrent TB incidence rate

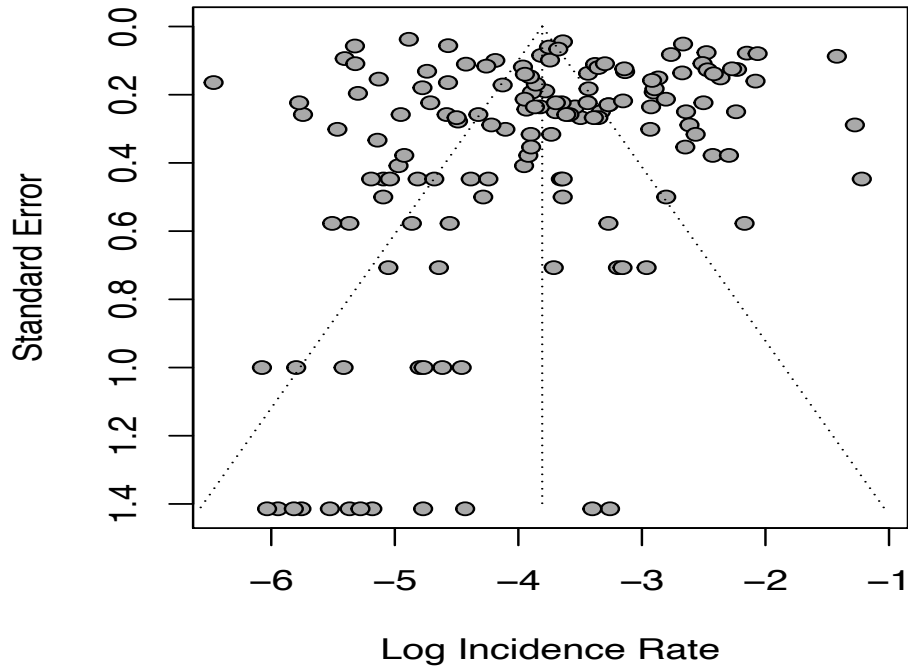

Figure S10 Forest plot of the proportion of reinfections among recurrent TB episodes by background TB incidence

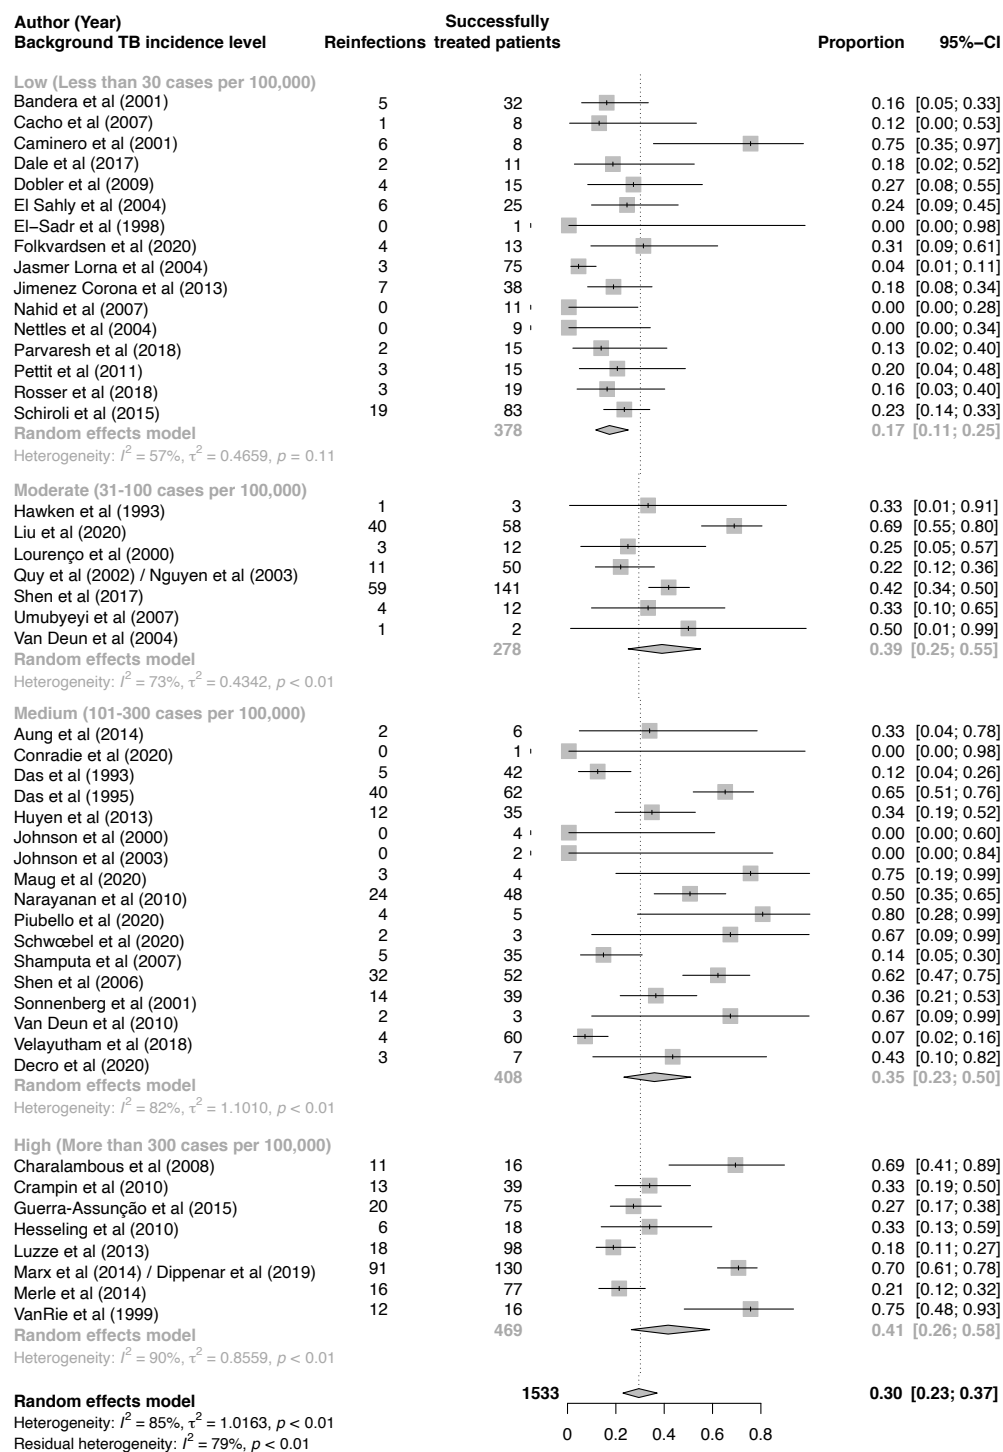

Figure S11 Forest plot of the proportion of reinfections among recurrent TB episodes by background HIV prevalence level

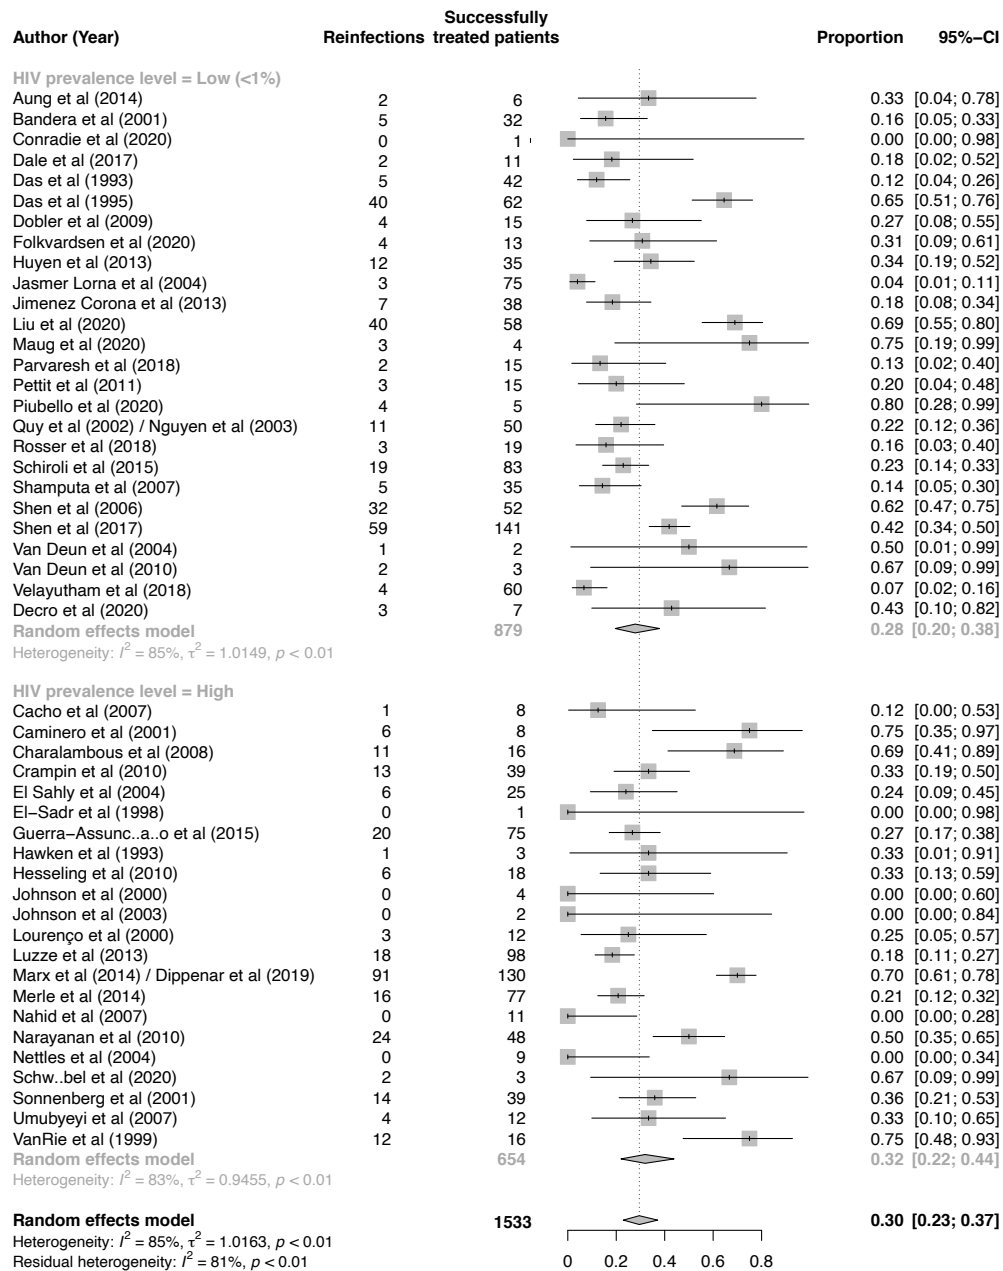

Figure S12 Forest plot of the proportion of reinfections among recurrent TB episodes by study design

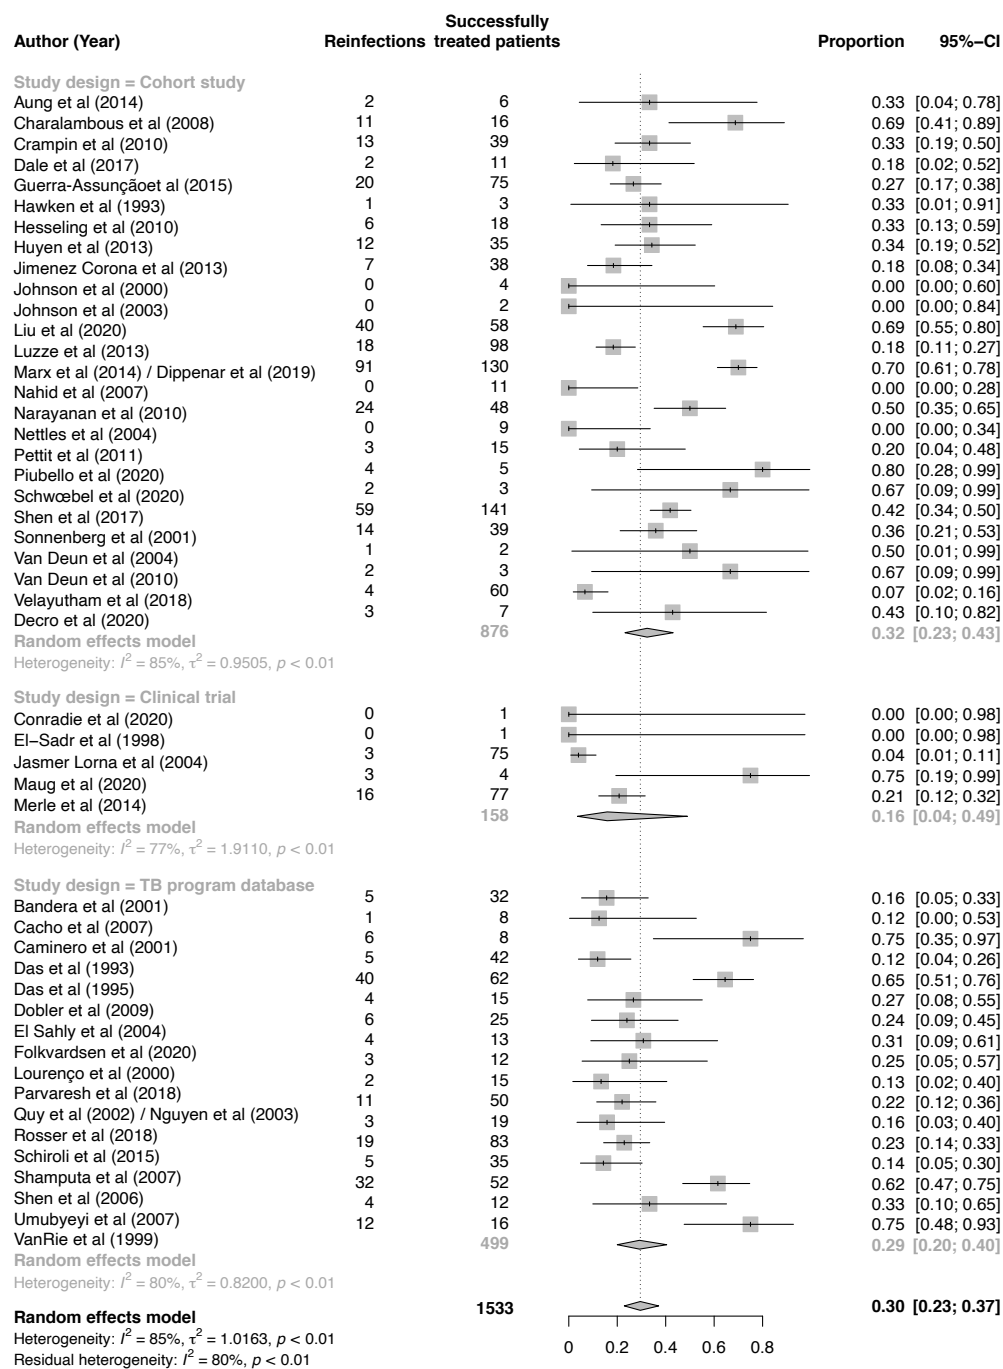

Figure S13 Forest plot of the proportion of reinfections among recurrent TB episodes by length of follow-up/observation period

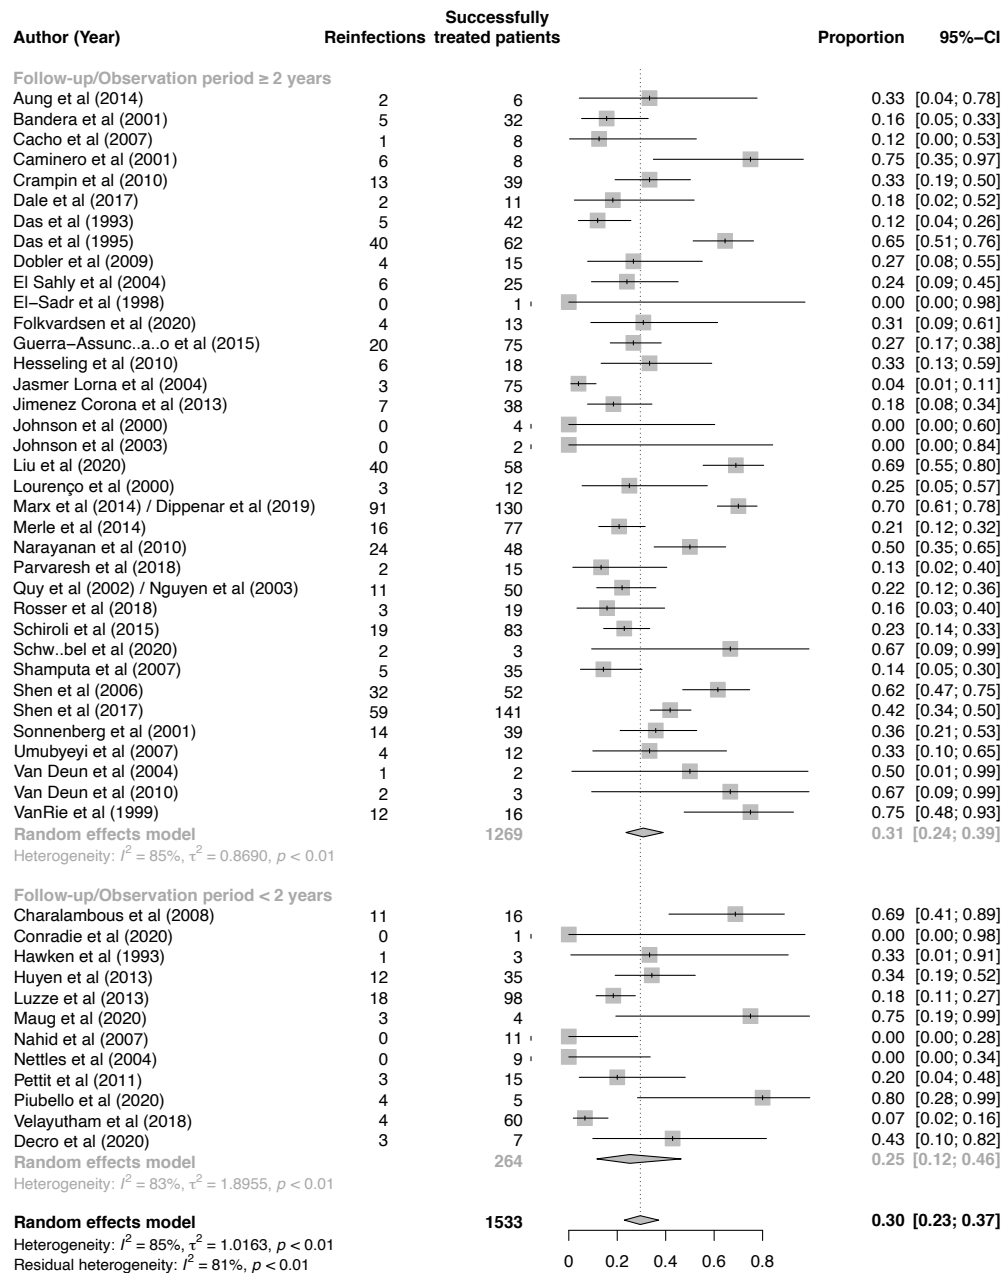



Figure S14 Forest plot of the proportion of reinfections among recurrent TB episodes by the proportion of episodes with DNA fingerprinting availability

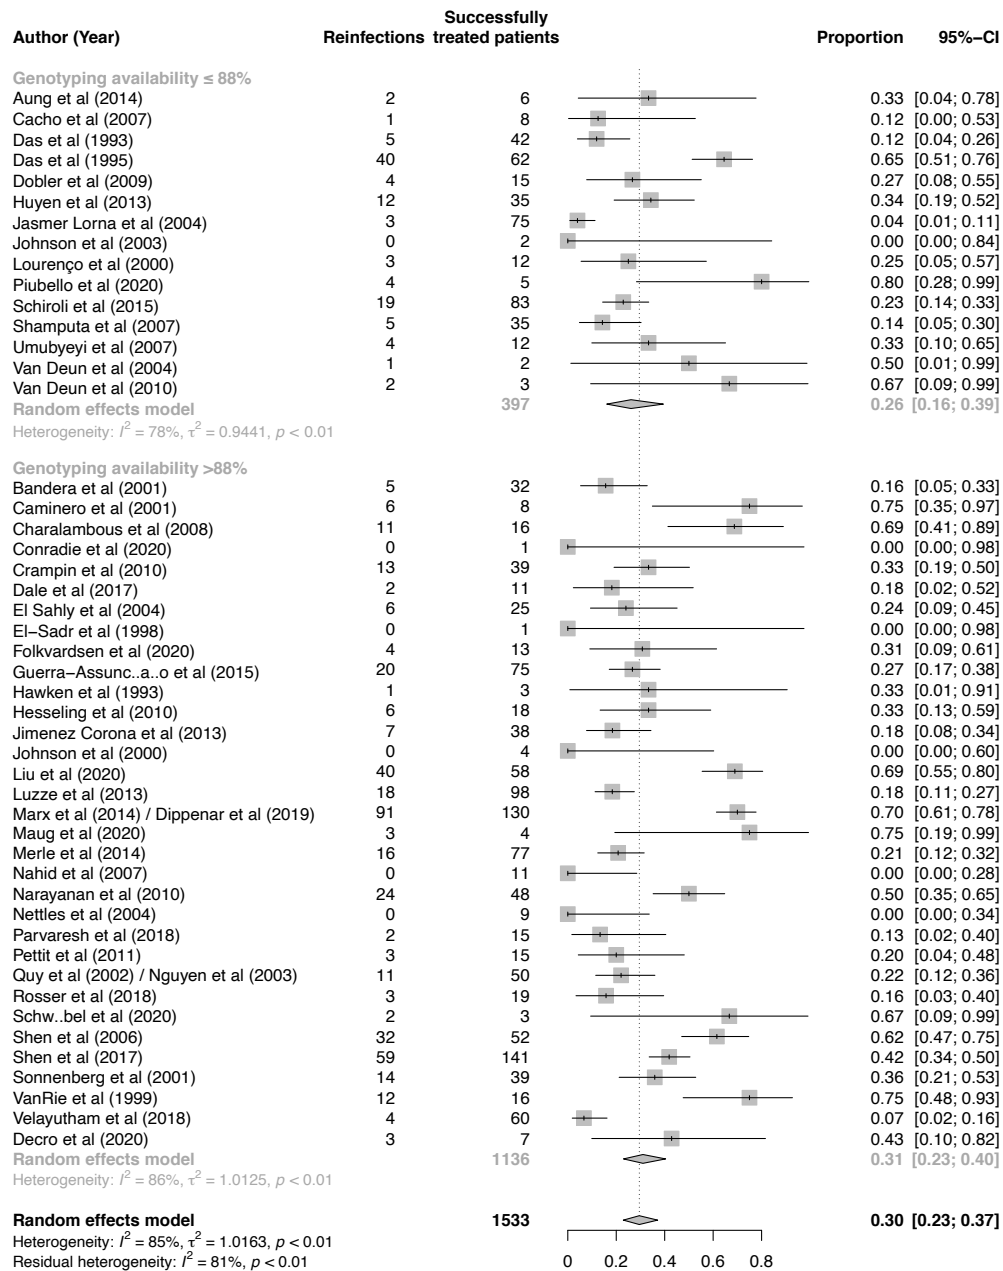

Figure S15 Forest plot of the proportion of reinfections among recurrent TB episodes by molecular method used

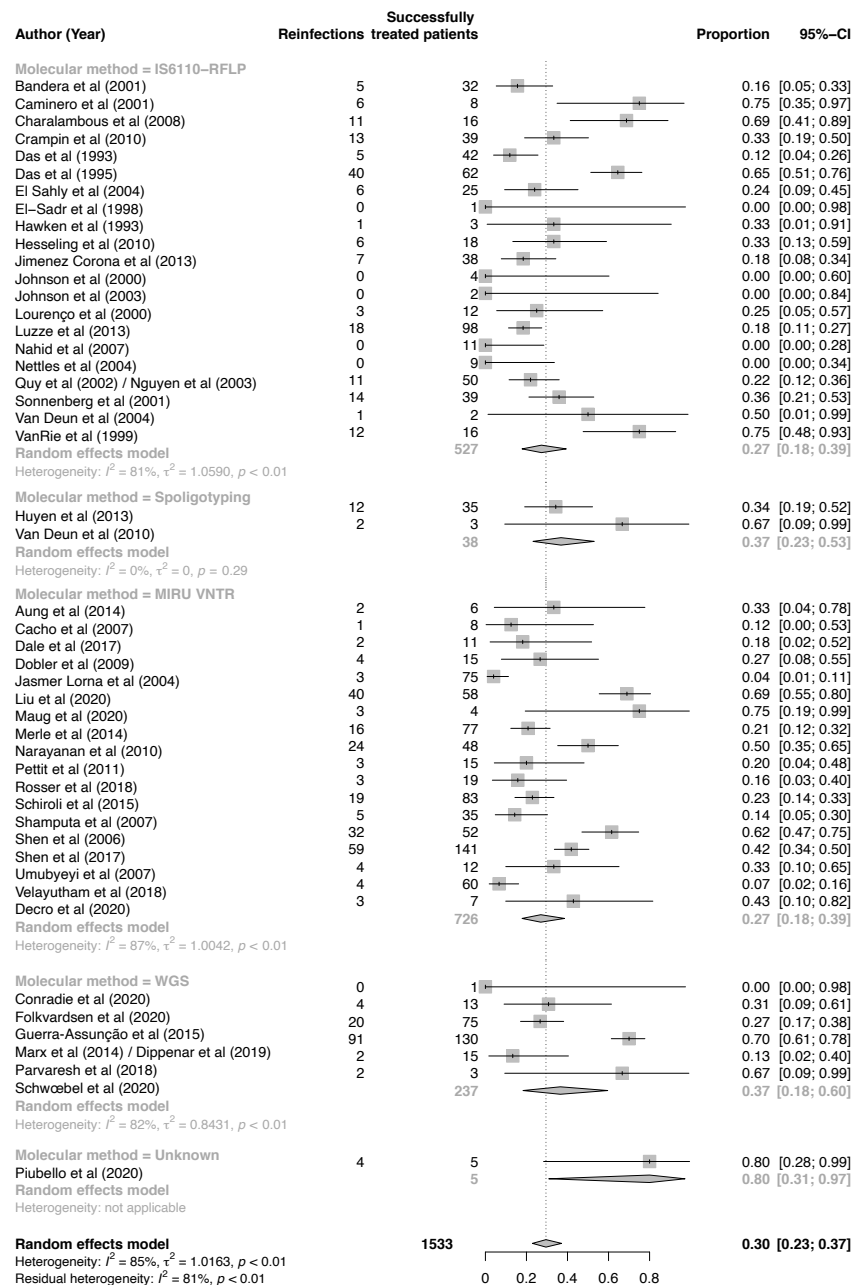

Figure S16 Forest plot of the proportion of reinfections among recurrent TB episodes by study sample size

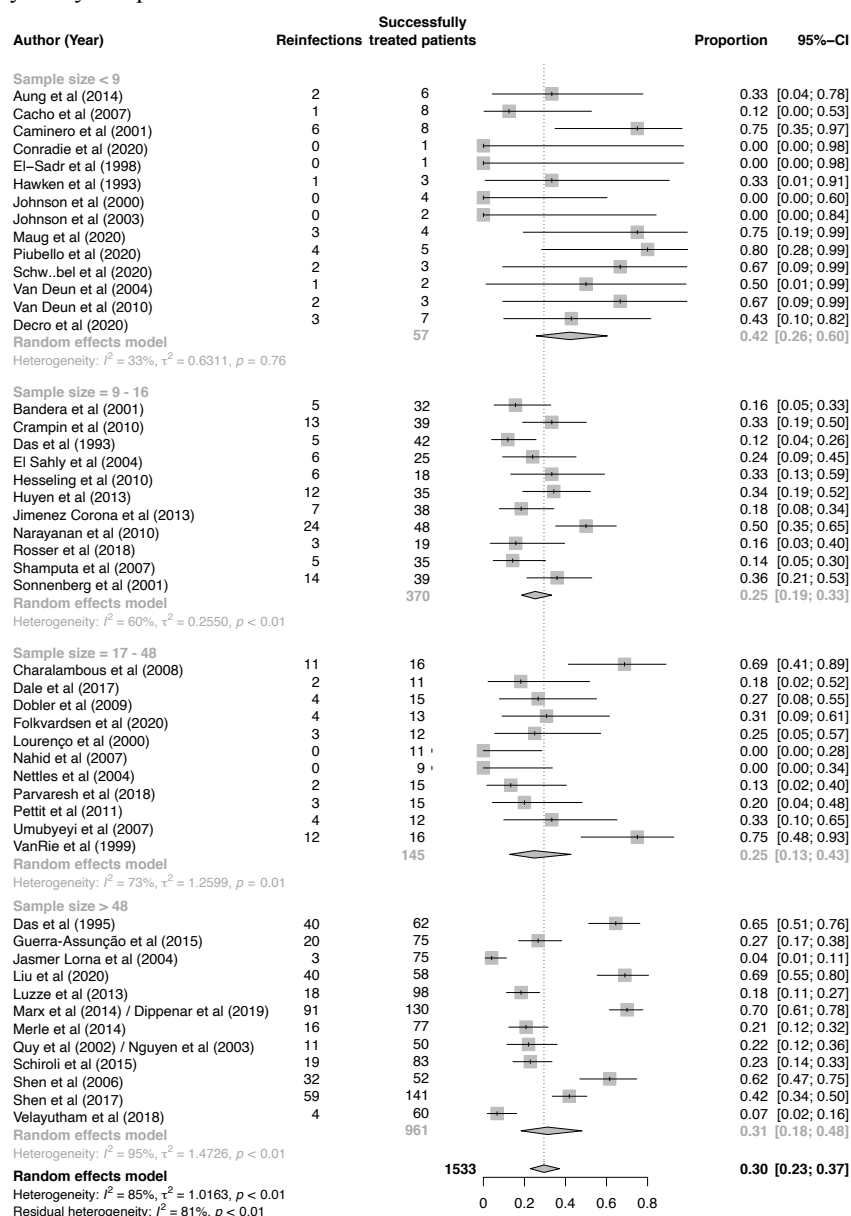

Figure S17 Forest plot of the proportion of reinfections among recurrent TB episodes by study quality

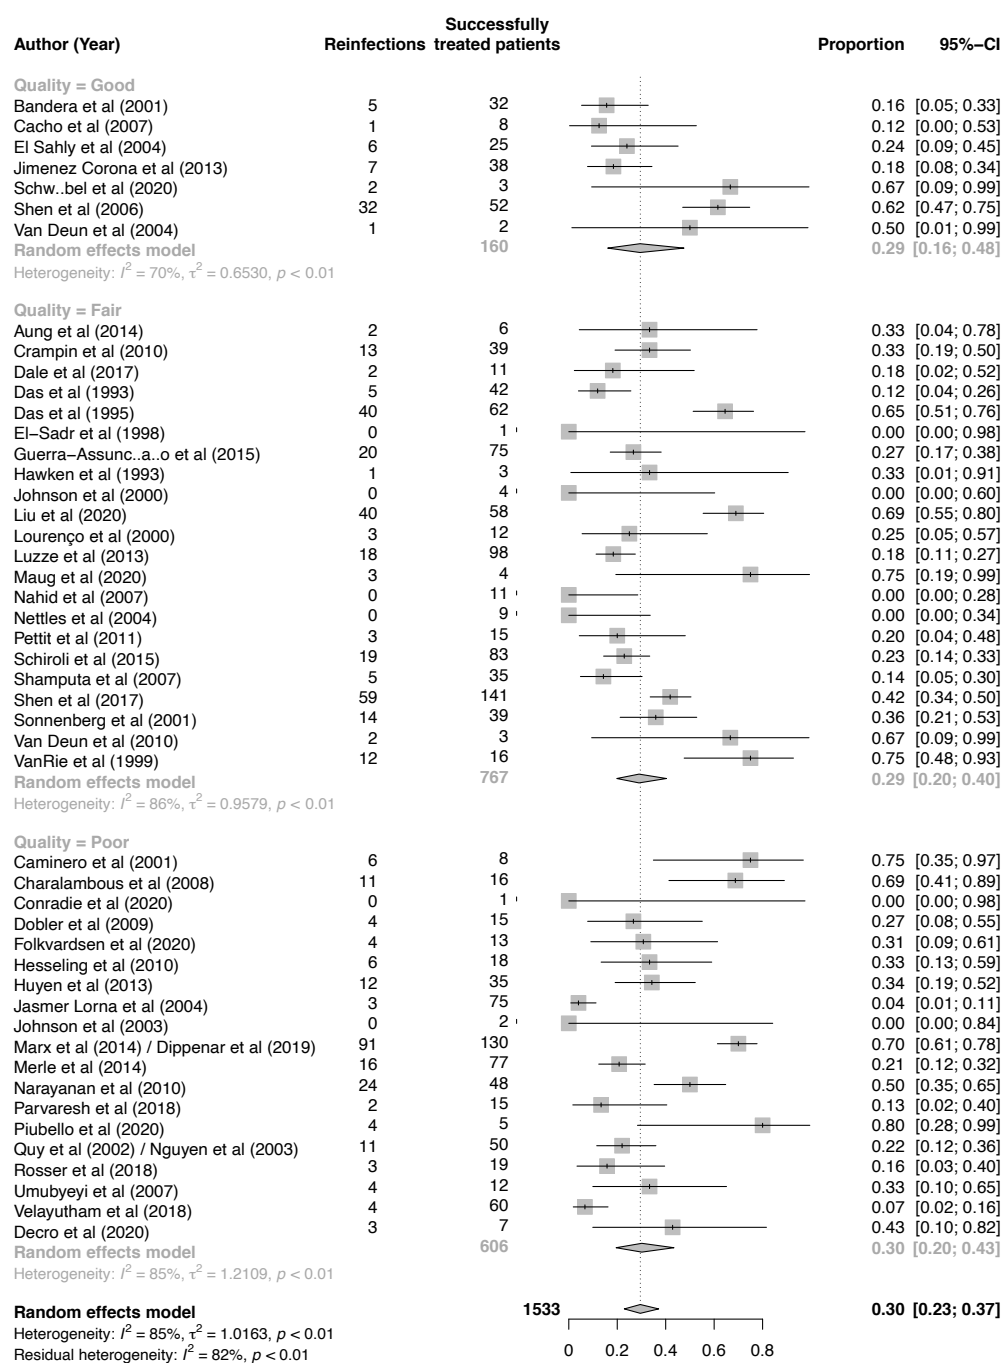

Figure S18 Funnel plot Proportion of reinfections

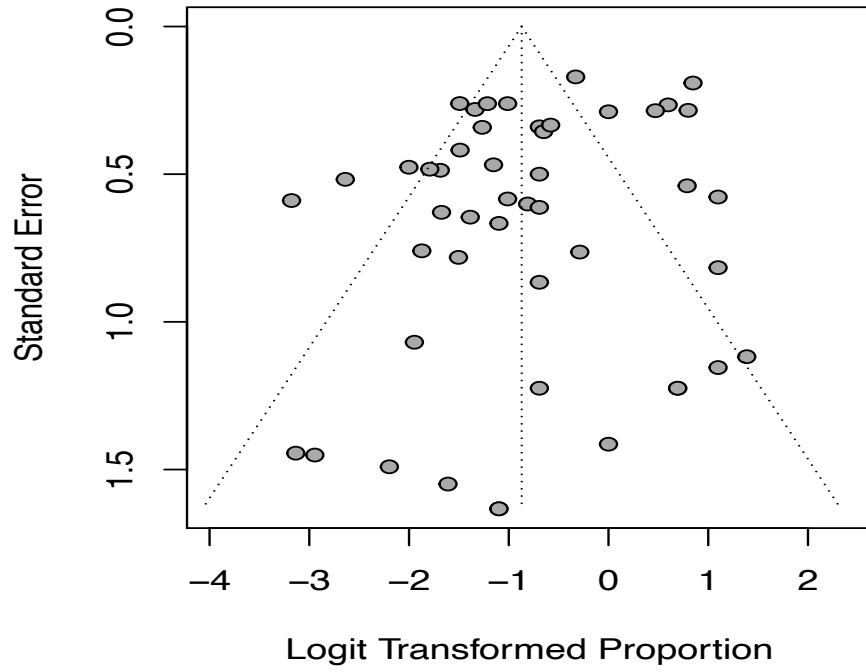

## Appendix 9 References of included studies

- 1 Anaam MS, Alrasheedy AA, Alsaahli S, *et al.* Rate and risk factors of recurrent tuberculosis in Yemen: a 5-year prospective study. *Infect Dis (London, England)* 2020;**52**:161–9. doi:10.1080/23744235.2019.1690162
- 2 Anaam MS, Ibrahim MIM, Al Serouri AW, Bassili A, Aldobhani A. A nested case-control study on relapse predictors among tuberculosis patients treated in Yemen's NTCP. *Public Health Action* 2012; **2**: 168–73.
- 3 Anh LTN, M V Kumar A, Ramaswamy G, *et al.* High Levels of Treatment Success and Zero Relapse in Multidrug-Resistant Tuberculosis Patients Receiving a Levofloxacin-Based Shorter Treatment Regimen in Vietnam. *Trop Med Infect Dis* 2020;**5**. doi:10.3390/tropicalmed5010043
- 4 Aung KJM, Declercq E, Ali MA, *et al.* Extension of the intensive phase reduces relapse but not failure in a regimen with rifampicin throughout. *Int J Tuberc Lung Dis* 2012; **16**: 455–61.
- 5 Aung KJM, Van Deun A, Declercq E, *et al.* Successful '9-month Bangladesh regimen' for multidrug-resistant tuberculosis among over 500 consecutive patients. *Int J Tuberc Lung Dis* 2014; **18**: 1180–7.
- 6 Babu Swai O, Aluoch JA, Githui WA, *et al.* Controlled clinical trial of a regimen of two durations for the treatment of isoniazid resistant pulmonary tuberculosis. *Tubercle* 1988;**69**:5–14. doi:10.1016/0041-3879(88)90035-9
- 7 Balasubramanian R, Sivasubramanian S, Vijayan VK, *et al.* Five year results of a 3-month and two 5-month regimens for the treatment of sputum-positive pulmonary tuberculosis in South India. *Tubercle* 1990; **71**: 253–8.
- 8 Banda H, Kang'ombe C, Harries AD, *et al.* Mortality rates and recurrent rates of tuberculosis in patients with smear-negative pulmonary tuberculosis and tuberculous pleural effusion who have completed treatment. *Int J Tuberc Lung Dis* 2000; **4**: 968–74.
- 9 Bandera A, Gori A, Catozzi L, *et al.* Molecular epidemiology study of exogenous reinfection in an area with a low incidence of tuberculosis. *J Clin Microbiol* 2001; **39**: 2213–8.
- 10 Banu Rekha V V, Rajaram K, Kripasankar AS, *et al.* Efficacy of the 6-month thrice-weekly regimen in the treatment of new sputum smear-positive pulmonary tuberculosis under clinical trial conditions. *Natl Med J India* 2012;**25**:196–200.NS -
- 11 Becerra MC, Appleton SC, Franke MF, *et al.* Recurrence after treatment for pulmonary multidrug-resistant tuberculosis. *Clin Infect Dis* 2010; **51**: 709–11.
- 12 Bechan S, Connolly C, Short GM, *et al.* Directly observed therapy in urban South Africa for tuberculosis given twice weekly in the workplace. *Trans R Soc Trop Med Hyg* 1997;**91**:704–7.NS -

- 13 Bhatt AN, Tharyan P, Michael JS, *et al.* Treatment outcomes with daily self-administered treatment and thrice-weekly directly-observed treatment in two cohorts of newly-diagnosed, sputum-positive adults with pulmonary tuberculosis. *Indian J Tuberc* 2020;**67**:105–11. doi:10.1016/j.ijtb.2017.05.012
- 14 Cacho J, Perez Meixeira A, Cano I, *et al.* Recurrent tuberculosis from 1992 to 2004 in a metropolitan area. *Eur Respir J* 2007; **30**: 333–7.
- 15 Caminero JA, Pena MJ, Campos-Herrero MI, *et al.* Exogenous reinfection with tuberculosis on a European island with a moderate incidence of disease. *Am J Respir Crit Care Med* 2001; **163**: 717–20.
- 16 Cao JP, Zhang LY, Zhu JQ, Chin DP. Two-year follow-up of directly-observed intermittent regimens for smear-positive pulmonary tuberculosis in China. *Int J Tuberc Lung Dis* 1998; **2**: 36-4
- 17 Castelo A, Jardim JR, Goihman S, *et al.* Comparison of daily and twice-weekly regimens to treat pulmonary tuberculosis. *Lancet* 1989; **2**: 1173–6.
- 18 Chaisson RE, Clermont HC, Holt EA, *et al.* Six-Month Supervised Intermittent Tuberculosis Therapy in Haitian Patients With and Without HIV Infection. 1996; **154**: 1034–8.
- 19 Chang KC, Leung CC, Yew WW, Ho SC, Tam CM. A nested case-control study on treatment-related risk factors for early relapse of tuberculosis. *Am J Respir Crit Care Med* 2004; **170**: 1124–30.
- 20 Charalambous S, Grant AD, Moloi V, *et al.* Contribution of reinfection to recurrent tuberculosis in South African gold miners. *Int J Tuberc Lung Dis* 2008; **12**: 942–8.
- 21 Chaulet P, Boulahbal F. Essai clinique d'une combinaison en proportions fixes de trois médicaments dans le traitement de la tuberculose. *Tuber Lung Dis* 1995;**76**:407–12. doi:10.1016/0962-8479(95)90006-3
- 22 Chiang C-Y, Enarson DA, Yu M-C, *et al.* Outcome of pulmonary multidrug-resistant tuberculosis: a 6-yr follow-up study. *Eur Respir J* 2006; **28**: 980–5.
- 23 Chien JY, Chen YT, Wu SG, Lee JJ, Wang JY, Yu CJ. Treatment outcome of patients with isoniazid mono-resistant tuberculosis. *Clin Microbiol Infect* 2014; **21**: 1–10.
- 24 Choi H, Lee M, Chen RY, *et al.* Predictors of pulmonary tuberculosis treatment outcomes in South Korea: a prospective cohort study, 2005-2012. *BMC Infect Dis* 2014; **14**: 360.
- 25 Ciza F, Gils T, Sawadogo M, *et al.* Course of Adverse Events during Short Treatment Regimen in Patients with Rifampicin-Resistant Tuberculosis in Burundi. *J Clin Med* 2020;**9**. doi:10.3390/jcm9061873

- 26 Cohn DL, Catlin BJ, Peterson KL, Judson FN, Sbarbaro JA. A 62-Dose , 6-Month Therapy for Pulmonary and Extrapulmonary Tuberculosis. *Ann Inter Med* 1990; **112**: 407–15.
- 27 Connolly C, Reid A, Davies G, Sturm W, McAdam KP, Wilkinson D. Relapse and mortality among HIV-infected and uninfected patients with tuberculosis successfully treated with twice weekly directly observed therapy in rural South Africa. *AIDS* 1999; **13**: 1543–7.
- 28 Conradie F, Diacon AH, Ngubane N, *et al.* Treatment of Highly Drug-Resistant Pulmonary Tuberculosis. *N Engl J Med* 2020;**382**:893–902. doi:10.1056/NEJMoa1901814
- 29 Cowie RL, Langton ME, Becklake MR. Pulmonary tuberculosis in South African gold miners. *Am Rev Respir Dis* 1989; **139**: 1086–9.
- 30 Crampin AC, Mwaungulu JN, Mwaungulu FD, *et al.* Recurrent TB: relapse or reinfection? The effect of HIV in a general population cohort in Malawi. *AIDS* 2010; **24**: 417–26.
- 31 D’Arc L. Smoking increases the risk of relapse after successful tuberculosis treatment. *Int J Epidemiol* 2008; **37**: 841-51.
- 32 Da S, Ghan SL, Allen BW, Mitchison DA. Application of DNA fingerprinting with IS986 to sequential mycobacterial isolates obtained from pulmonary tuberculosis patients in Hong Kong before , during and after short-course chemotherapy. 1993; **74**: 47-51
- 33 Dale KD, Globan M, Tay EL, Trauer JM, Trevan PG, Denholm JT. Recurrence of tuberculosis in a low-incidence setting without directly observed treatment: Victoria, Australia, 2002-2014. *Int J Tuberc Lung Dis* 2017; **21**: 550–5.
- 34 Dangisso MH, Woldesemayat EM, Datiko DG, Lindtjorn B. Long-term outcome of smear-positive tuberculosis patients after initiation and completion of treatment: A ten-year retrospective cohort study. *PLoS One* 2018; **13**: e0193396.
- 35 Das S, Paramasivan CN, Lowrie DB, *et al.* IS6110 restriction fragment length polymorphism typing of clinical isolates of Mycobacterium tuberculosis from patients with pulmonary tuberculosis in Madras, south India. *Tuber Lung Dis* 1995; **76**: 550–4.
- 36 Datiko DG, Lindtjorn B. Tuberculosis recurrence in smear-positive patients cured under DOTS in southern Ethiopia: retrospective cohort study. *BMC Public Health* 2009; **9**: 348.
- 37 Decroo T, Maug AKJ, Hossain MA, *et al.* Injectables’ key role in rifampicin-resistant tuberculosis shorter treatment regimen outcomes. *PLoS One* 2020;**15**:e0238016. doi:10.1371/journal.pone.0238016



- 38 Dippenaar A, De Vos M, Marx FM, *et al.* Whole genome sequencing provides additional insights into recurrent tuberculosis classified as endogenous reactivation by IS6110 DNA fingerprinting. *Infect Genet Evol* 2019;**75**:103948. doi:10.1016/j.meegid.2019.103948
- 39 Dobler CC, Crawford AB, Jeffs PJ, Gilbert GL, Marks GB. Recurrence of tuberculosis in a low-incidence setting. *Eur Respir J* 2009; **33**: 160–7.
- 40 Dutt A, Stead WW. Short-Course Chemotherapy for Tuberculosis with Mainly Twice-Weekly Isoniazid and Rifampin Community Physicians' Seven-Year Experience with Mainly Outpatients. *Am J Med* 1984; **77**: 233-43
- 41 Dutt AK, Moers D, Stead WW. Smear-negative, culture-positive pulmonary tuberculosis. Six-month chemotherapy with isoniazid and rifampin. *Am Rev Respir Dis* 1990;**141**:1232–5.
- 42 el Sahly HM El, Wright JA, Soini H, Bui TT, Escalante P. Recurrent tuberculosis in Houston, Texas: a population-based study. *Int J Tuberc Lung Dis* 2004; **8**: 333–40.
- 43 el-Sadr WM, Perlman DC, Matts JP, *et al.* Evaluation of an Intensive Intermittent-Induction Regimen and Duration of Short-Course Treatment for Human Immunodeficiency Virus – Related Pulmonary Tuberculosis. ry Beirm Community Programs for Clinical Research on AIDS (CPCRA) and the AIDS Clinical Trials Group (ACTG). *Clin Infect Dis* 1998; **26**: 1148–58.
- 44 Escudero E, Peña JM, Vázquez JJ, Ortega A. Multidrug-resistant tuberculosis without HIV infection: success with individualized therapy. *Int J Tuberc Lung Dis* 2006; **10**: 409–14.
- 45 Fitzgerald DW, Desvarieux M, Severe P, Johnson WD Jr, Pape JW. Effect of post-treatment isoniazid on prevention of recurrent tuberculosis in HIV-1-infected individuals: a randomised trial. *Lancet* 2000; **356**: 1470–4.
- 46 Folkvardsen DB, Norman A, Rasmussen EM, *et al.* Recurrent tuberculosis in patients infected with the predominant Mycobacterium tuberculosis outbreak strain in Denmark. New insights gained through whole genome sequencing. *Infect Genet Evol J Mol Epidemiol Evol Genet Infect Dis* 2020;**80**:104169. doi:10.1016/j.meegid.2020.104169
- 47 Fox GJ, Nguyen VN, Dinh NS, *et al.* Post-treatment Mortality Among Patients With Tuberculosis : A Prospective Cohort Study of 10 964 Patients in Vietnam. *Clin Infect Dis* 2018; **68**: 1–8.
- 48 Gelmanova IY, Ahmad Khan F, Becerra MC, *et al.* Low rates of recurrence after successful treatment of multidrug-resistant tuberculosis in Tomsk, Russia. *Int J Tuberc Lung Dis* 2015; **19**: 399–405.

- 49 Gengiah TN, Botha JH, Soowamber D, Naidoo K, Karim SSA. Original Article Low rifampicin concentrations in tuberculosis patients with HIV infection. *J Infect Dev Ctries* 2014; **8**: 987-93.
- 50 Glynn JR, Murray J, Bester A, Nelson G, Shearer S, Sonnenber P. High rates of recurrence in HIV-infected and HIV-uninfected patients with tuberculosis. *J Infect Dis* 2010; **201**: 704–11.
- 51 Gonzales Montaner D. Rifabutin for the treatment of newly-diagnosed pulmonary tuberculosis : a multinational , randomized , comparative study versus Rifampicin. *Tuber Lung Dis* 1994; **75**: 341-7.
- 52 Gopalan N, Santhanakrishnan RK, Palaniappan AN, et al. Daily vs Intermittent Antituberculosis Therapy for Pulmonary Tuberculosis in Patients With HIV A Randomized Clinical Trial. *JAMA Intern Med* 2018; **178**: 110029: 1–9.
- 53 Guerra-Assunção JA, Houben RMGJ, Crampin AC, et al. Recurrence due to Relapse or Reinfection With Mycobacterium tuberculosis : A Whole-Genome Sequencing Approach in a Large , Population- Based Cohort With a High HIV Infection Prevalence and Active Follow-up. *J Infect Dis* 2015; **211**: 1154-63.
- 54 Guglielmetti L, Jaspard M, Dû D Le, et al. Long-term outcome and safety of prolonged bedaquiline treatment for multidrug-resistant tuberculosis. *Eur Respir J* 2017. DOI:10.1183/13993003.01799-2016.
- 55 Hang NTL, Maeda S, Keicho N, et al. Sublineages of Mycobacterium tuberculosis Beijing genotype strains and unfavorable outcomes of anti-tuberculosis treatment. *Tuberculosis* 2015; **95**: 336–42.
- 56 Hawken M, Nunn P, Gatua S, et al. Increased recurrence of tuberculosis in HIV-1-infected patients in Kenya. *Lancet* 1993; **342**: 332–7.
- 57 He GX, Xie YG, Wang LX, et al. Follow-up of patients with multidrug resistant tuberculosis four years after standardized first-line drug treatment. *PLoS One* 2010; **5**: e10799.
- 58 Heijden YF Van Der, Karim F, Chinappa T, Mufamadi G, Zako L, Shepherd BE. Older age at first tuberculosis diagnosis is associated with tuberculosis recurrence in HIV-negative persons. 2018; **22**: 871–7.
- 59 Hesseling AC, Walzl G, Enarson DA, et al. Baseline sputum time to detection predicts month two culture conversion and relapse in non-HIV-infected patients. *Int J Tuberc Lung Dis* 2010; **14**: 560–70.
- 60 Hong YP, Kim SC, Chang SC, Kim SJ, Jin BW, Park CD. Comparison of a daily and three intermittent retreatment regimens for pulmonary tuberculosis administered under programme conditions. *Tubercle* 1988; **69**: 241–53.

- 61 Houben RMGJ, Glynn JR, Mboma S, *et al.* The impact of HIV and ART on recurrent tuberculosis in a sub-Saharan setting. *AIDS* 2012; **26**: 2233–9.
- 62 Huyen MNT, Buu TN, Tiemersma E, *et al.* Tuberculosis Relapse in Vietnam Is Significantly Associated With Mycobacterium tuberculosis Beijing Genotype Infections. *J Infect Dis* 2013; **207**. DOI:10.1093/infdis/jit048.
- 63 Jasmer RM, Boezeman L, Schwartzman K, *et al.* Recurrent tuberculosis in the United States and Canada: relapse or reinfection? *Am J Respir Crit Care Med* 2004; **170**: 1360–6.
- 64 Jasmer RM, Seaman CB, Gonzalez LC, Kawamura LM, Osmond DH, Daley CL. Tuberculosis treatment outcomes: Directly observed therapy compared with self-administered therapy. *Am J Respir Crit Care Med* 2004; **170**: 561–6.
- 65 Jawahar MS, Banurekha V V, Paramasivan CN, *et al.* Randomized clinical trial of thrice-weekly 4-month moxifloxacin or gatifloxacin containing regimens in the treatment of new sputum positive pulmonary tuberculosis patients. *PLoS One* 2013;**8**:e67030.
- 66 Jiménez-Corona ME, Cruz-hervert LP, García-garcía L, *et al.* Association of diabetes and tuberculosis : impact on treatment and post-treatment outcomes. *Thorax* 2013; **68**: 214–20.
- 67 Jo K, Yoo J, Hong Y, *et al.* ScienceDirect Risk factors for 1-year relapse of pulmonary tuberculosis treated with a 6-month daily regimen. *Respir Med* 2014; **108**: 654–9.
- 68 Johnson JL, Hadad DJ, Dietze R, *et al.* Shortening treatment in adults with noncavitary tuberculosis and 2-month culture conversion. *Am J Respir Crit Care Med* 2009; **180**: 558–63.
- 69 Johnson JL, Okwera A, Nsubuga P, *et al.* Efficacy of an unsupervised 8-month rifampicin-containing regimen for the treatment of pulmonary tuberculosis in HIV-infected adults. 2000; **4**: 1032–40.
- 70 Johnson JL, Ssekasanvu E, Okwera A, *et al.* Randomized trial of adjunctive interleukin-2 in adults with pulmonary tuberculosis. *Am J Respir Crit Care Med* 2003; **168**: 185–91.
- 71 Karagöz T, Moçın ÖY, Pazarlı P, *et al.* The treatment results of patients with multidrug resistant tuberculosis and factors affecting treatment outcome. *Tuberk Toraks* 2009; **57**: 383–92.
- 72 Kassim S, Sassan-Morokro M, Ackah A, *et al.* Two-year follow-up of persons with HIV-1- and HIV-2-associated pulmonary tuberculosis treated with short-course chemotherapy in West Africa. *AIDS* 1995; **9**: 1185–91.

- 73 Kennedy AN, Berger L, Curram J, *et al.* Randomized controlled trial of a drug regimen that includes ciprofloxacin for the treatment of pulmonary tuberculosis. *Clin Infect Dis* 1996;**22**:827–33.NS -
- 74 Kim S, Lee H, Park HY, *et al.* Outcomes of pulmonary tuberculosis in patients with discordant phenotypic isoniazid resistance testing. *Respir Med* 2017; **133**: 6–11.
- 75 Kohno S, Koga H, Kaku M, *et al.* Prospective comparative study of ofloxacin or ethambutol for the treatment of pulmonary tuberculosis. *Chest* 1992; **102**: 1815–8.
- 76 Kong H, Service C, Medical B. Controlled Trial of 2, 4, and 6 Months of Pyrazinamide in 6-Month, Three-Times-Weekly Regimens for Smear-positive Pulmonary Tuberculosis, Including an Assessment of a Combined Preparation of Isoniazid, Rifampin and pyrazinamide. Results at 30 months. Hong Kong Chest Service/British Medical Research Council. *Am Rev Respir Dis* 1990; **143**: 1–7.
- 77 Kuaban C, Noeske J, Rieder HL, *et al.* High effectiveness of a 12-month regimen for MDR-TB patients in Cameroon. *Int J Tuberc Lung Dis* 2015; **19**: 517–24.
- 78 Lan NTN, Lien HTK, Tung LB, *et al.* Mycobacterium tuberculosis Beijing Genotype and Risk for Treatment Failure and Relapse, Vietnam. *Emerg Infect Dis* 2003;**9**:1633–5. doi:10.3201/eid0912.030169
- 79 Lawal I, Fourie B, Mathebula M, *et al.* FDG-PET/CT as a non invasive biomarker for assessing adequacy of treatment and predicting relapse in patients treated for pulmonary tuberculosis. *J Nucl Med* 2019; DOI:10.2967/jnumed.119.233783.
- 80 Lee H, Jeong B-H, Park HY, *et al.* Treatment Outcomes with Fluoroquinolone-Containing Regimens for Isoniazid-Resistant Pulmonary Tuberculosis. *Antimicrob Agents Chemother* 2015;**60**:471–7. doi:10.1128/AAC.01377-15
- 81 Lee H, Sohn JW, Sim YS, *et al.* Outcomes of extended duration therapy for drug-susceptible cavitary pulmonary tuberculosis. *Ann Transl Med* 2020;**8**:346. doi:10.21037/atm.2020.02.104
- 82 Lee J, Lim H-J, Cho Y-J, *et al.* Recurrence after successful treatment among patients with multidrug-resistant tuberculosis. *Int J Tuberc Lung Dis* 2011; **15**: 1331–3.
- 83 Lee M, Lee J, Carroll MW, *et al.* Linezolid for treatment of chronic extensively drug-resistant tuberculosis. *N Engl J Med* 2012; **367**: 1508–18.
- 84 Lee P-H, Lin H-C, Huang AS-E, Wei S-H, Lai M-S, Lin H-H. Diabetes and risk of tuberculosis relapse: nationwide nested case-control study. *PLoS One* 2014; **9**: e92623.

- 85 Liu Y, Zhang XX, Yu JJ, *et al.* Tuberculosis relapse is more common than reinfection in Beijing, China. *Infect Dis (London, England)* 2020;:1–8. doi:10.1080/23744235.2020.1794027
- 86 Lourenço MCS, Grinsztejn B, Fandinho-Montes FCO, Da Silva MG, Saad MHF, Fonseca LS. Genotypic patterns of multiple isolates of *M. tuberculosis* from tuberculous HIV patients. *Trop Med Int Heal* 2000; **5**: 488–94.
- 87 Luzze H, Johnson DF, Dickman K, *et al.* Relapse more common than reinfection in recurrent tuberculosis 1 – 2 years post treatment in urban Uganda. *Int J Tuberc Lung Dis* 2013; **17**: 361–7.
- 88 Ma Y, Pang Y, Shu W, *et al.* Metformin reduces the relapse rate of tuberculosis patients with diabetes mellitus: experiences from 3-year follow-up. *Eur J Clin Microbiol Infect Dis* 2018; **37**: 1259–63.
- 89 Malherbe ST, Chen RY, Dupont P, *et al.* Quantitative 18F-FDG PET-CT scan characteristics correlate with tuberculosis treatment response. *EJNMMI Res* 2020;**10**:8. doi:10.1186/s13550-020-0591-9
- 90 Martinez FD, Hernandez HM. Relapse after short-course chemotherapy of patients with sputum smear-positive pulmonary tuberculosis under routine conditions with additional information on side effects and contact tracing. *Tuber Lung Dis* 1996; **77**: 425–8.
- 91 Marx FM, Dunbar R, Enarson DA, *et al.* The temporal dynamics of relapse and reinfection tuberculosis after successful treatment: a retrospective cohort study. *Clin Infect Dis* 2014; **58**: 1676–83.
- 92 Mathur N, Chatla C, Syed S, *et al.* Prospective 1-year follow-up study of all cured, new sputum smear positive tuberculosis patients under the Revised National Tuberculosis Control Program in Hyderabad, Telangana State, India. *Lung India* 2019;**36**:519–24. doi:10.4103/lungindia.lungindia\_143\_19
- 93 Maug AKJ, Hossain MA, Gumusboga M, *et al.* First-line tuberculosis treatment with double-dose rifampicin is well tolerated. *Int J Tuberc lung Dis Off J Int Union against Tuberc Lung Dis* 2020;**24**:499–505. doi:10.5588/ijtld.19.0063
- 94 McGreevy J. Outcomes of HIV-infected patients treated for recurrent tuberculosis with the standard retreatment regimen. *Int J Tuberc Lung Dis* 2012; **16**: 841–5.
- 95 Merle CS, Fielding K, Bah Sow O, *et al.* A Four-Month Gatifloxacin-Containing Regimen for Treating Tuberculosis. *N Eng J Med* 2014; 371: 1588-98
- 96 Migliori GB, Espinal M, Danilova ID, *et al.* Frequency of recurrence among MDR-TB cases ‘successfully’ treated with standardised short-course chemotherapy. *Int J Tuberc Lung Dis* 2002; **6**: 858–64.

- 97 Miles SH, Maat RB. A successful supervised outpatient short-course tuberculosis treatment program in an open refugee camp on the Thai-Cambodian border. *Am Rev Respir Dis* 1984;**130**:827–30. doi:10.1164/arrd.1984.130.5.827
- 98 Mohanty KC, Dhamgay MD. Controlled Trial of Ciprofloxacin in Short-term Chemotherapy for Pulmonary Tuberculosis. *Chest* 1993, **104**: 1194-8.
- 99 Moosazadeh M, Bahrampour A, Nasehi M, *et al.* The incidence of recurrence of tuberculosis and its related factors in smear-positive pulmonary tuberculosis patients in Iran: A retrospective cohort study. *Lung India* 2015; **32**: 557–60.
- 100 Moreno-Martinez R. Incidencia de recaída y factores de riesgo asociados en pacientes con tuberculosis pulmonar. *Rev Med Inst Mex Segur Soc* 2007; **45**: 335–42.
- 101 Nahid P, Gonzalez LC, Rudoy I, *et al.* Treatment outcomes of patients with HIV and tuberculosis. *Am J Respir Crit Care Med* 2007; **175**: 1199–206.
- 102 Narayanan S, Swaminathan S, Supply P, *et al.* Impact of HIV infection on the recurrence of tuberculosis in South India. *J Infect Dis* 2010; **201**: 691–703.
- 103 Nettles RE, Mazo D, Alwood K, *et al.* Risk factors for relapse and acquired rifamycin resistance after directly observed tuberculosis treatment: a comparison by HIV serostatus and rifamycin use. *Clin Infect Dis* 2004; **38**: 731–6.
- 104 No authors listed. A Controlled Clinical Trial of 3- and 5-month regimens in the treatment of sputum-positive pulmonary tuberculosis in South India. Tuberculosis Research Centre, Madras, and National Tuberculosis Institute, Bangalore. *Am Rev Respir Dis* 1986; **134**: 27–33.
- 105 No authors listed. A controlled clinical trial of oral short-course regimens in the treatment of sputum-positive pulmonary tuberculosis. Tuberculosis Research Center. *Int J Tuberc Lung Dis* 1997; **1**: 509-17
- 106 No authors listed. A Controlled Trial of 3-Month, 4-Month, and 6-Month Regimens of Chemotherapy for Sputum-smear-negative Pulmonary Tuberculosis. Results at 5 years. Hong Kong Chest Service/Tuberculosis Research Centre, Madras/British Medical Research Council. *Am Rev Respir Dis* 1988; **139**: 871–6.
- 107 No authors listed. Assessment of a Daily Combined Preparation of Isoniazid , Rifampin , and Pyrazinamide in a Controlled Trial of Three 6-Month Regimens for Smear-positive Pulmonary Tuberculosis. *Am Rev Respir Dis* 1990; : 707–12.



- 108 No authors listed. Clinical trial of six-month and four-month regimens of chemotherapy in the treatment of pulmonary tuberculosis: the results up to 30 months. *Tubercle* 1981; **62**: 95–102.
- 109 No authors listed. Controlled clinical trial of 4 short-course regimens of chemotherapy (three 6-month and one 8-month) for pulmonary tuberculosis: Final report. *Tubercle* 1986; **67**: 5–15.
- 110 No authors listed. Controlled clinical trial of four short-course regimens of chemotherapy for two durations in the treatment of pulmonary tuberculosis. Second report. Third East African/British Medical Research Council Study. *Tubercle* 1980; **61**: 59–69.
- 111 No authors listed. Controlled Clinical Trial of Levamisole in Short-course Chemotherapy for Pulmonary Tuberculosis. *Am Rev Respir Dis* 1989; **140**: 990-5
- 112 No authors listed. Controlled Clinical Trial of Two 6-Month Regimens of Chemotherapy in the Treatment of Pulmonary Tuberculosis. Tanzania/British Medical Research Council study. *Am Rev Respir Dis* 1985; **131**: 727–31.
- 113 No authors listed. Controlled trial of 4 three-times-weekly regimens and a daily regimen all given for 6 months for pulmonary tuberculosis second report: the results up to 24 months. Hong Kong Chest Service/British Medical Research Council. *Tubercle* 1982; **63**: 89–98.
- 114 No authors listed. Ethambutol plus isoniazid for the treatment of tuberculosis – a controlled trial of four. *Tubercle* 1981; **61**: 13–29.
- 115 No authors listed. Evaluation of a non-rifampicin continuation phase (6HE) following thrice-weekly intensive phase for the treatment of new sputum positive pulmonary tuberculosis. *Indian J Tuberc* 2007; **54**: 84-90
- 116 No authors listed. Five year Follow-Up of a Clinical Trial of Three 6-Month Regimens of Chemotherapy Given Intermittently in the Continuation Phase in the Treatment of Pulmonary Tuberculosis. *Am Rev Respir Dis* 1988; **137**: 1147–50.
- 117 No authors listed. Report S. Controlled Clinical Trial of Five Short-Course ( 4-Month ) Chemotherapy Regimens in Pulmonary Tuberculosis Second Report of the 4th Study. *Am Rev Respir Dis* 1980; **123**: 165–70.
- 118 Nolan CM, Goldberg S V. Treatment of isoniazid-resistant tuberculosis with isoniazid , rifampin , ethambutol , and pyrazinamide for 6 months. 2002; **6**: 952–8.
- 119 Ormerod LP, Horsfield N, Green RM. Tuberculosis treatment outcome monitoring : Blackburn 1988 – 2000 SUMMARY. 2002; **6**: 662–5.

- 120 Palmero DJ, Ambroggi M, Brea A, *et al.* Treatment and follow-up of HIV-negative multidrug-resistant tuberculosis patients in an infectious diseases reference hospital, Buenos Aires, Argentina. *Int J Tuberc Lung Dis* 2004; **8**: 778–84.
- 121 Park DW, Chung SJ, Yeo Y, *et al.* Therapeutic issues with, and long-term outcomes of, pulmonary mycobacterial tuberculosis treatment in patients with autoimmune rheumatic diseases. *J Thorac Dis* 2019; **11**:4573–82. doi:10.21037/jtd.2019.10.74
- 122 Parvaresh L, Crighton T, Martinez E, Bustamante A, Chen S, Sintchenko V. Recurrence of tuberculosis in a low-incidence setting: a retrospective cross-sectional study augmented by whole genome sequencing. *BMC Infect Dis* 2018; **18**: 265.
- 123 Peetluk LS, Rebeiro PF, Cordeiro-Santos M, *et al.* Lack of Weight Gain During the First 2 Months of Treatment and Human Immunodeficiency Virus Independently Predict Unsuccessful Treatment Outcomes in Tuberculosis. *J Infect Dis* 2020; **221**:1416–24. doi:10.1093/infdis/jiz595
- 124 Perez Guzman H. Results of a 12-month regimen for drug-resistant pulmonary tuberculosis. *Int J Tuberc Lung Dis* 2002; **6**: 1102–9.
- 125 Perriens JH, Colebunders RL, Karahunga C, *et al.* Increased Mortality and Tuberculosis Treatment Failure Rate among Human Immunodeficiency Virus (HIV) Seropositive Compared with HIV Seronegative Patients with Pulmonary Tuberculosis Treated with " Standard " Chemotherapy in Kinshasa, Zaire. *Am Rev Respir Dis* 1991; **144**: 750-5
- 126 Perriens JH, St Louis ME, Mukadi YB, *et al.* Pulmonary tuberculosis in HIV infected patients in Zaire, a Controlled Trial of Treatment for Either 6 or 12 Months. *N Eng J Med* 1995; **332**: 779–84.
- 127 Pettit AC, Kaltenbach LA, Maruri F, *et al.* Chronic lung disease and HIV infection are risk factors for recurrent tuberculosis in a low-incidence setting. *Int J Tuberc Lung Dis* 2011; **15**: 906–11.
- 128 Picon PD, Bassanesi SL, Caramori MLA, *et al.* Risk factors for recurrence of tuberculosis. *J Bras Pneumol* 2007; **33**: 572–8.
- 129 Piubello A, Harouna SH, Souleymane MB, *et al.* High cure rate with standardised short-course multidrug-resistant tuberculosis treatment in Niger: no relapses. *Int J Tuberc Lung Dis* 2014; **18**: 1188–94.
- 130 Piubello A, Souleymane MB, Hassane-Harouna S, *et al.* Management of multidrug-resistant tuberculosis with shorter treatment regimen in Niger: Nationwide programmatic achievements. *Respir Med* 2020; **161**:105844. doi:10.1016/j.rmed.2019.105844
- 131 Prasad R, Verma SK, Sahai S, Kumar S, Jain A, Prasad R. Efficacy and Safety of Kanamycin , Ethionamide , PAS and Cycloserine in Multidrug-



- resistant Pulmonary Tuberculosis Patients. *Indian J Chest Dis Allied Sci* 2004; **226003**.
- 132 Prasad R, Verma SK, Shrivastava P, *et al*. A follow up study on revised national tuberculosis control programme (rntcp): results from a single centre study. *Lung India* 2008; **25**: 142–4.
- 133 Pulido F, Pena J, Rubio R, *et al*. Relapse of Tuberculosis After Treatment in Human Immunodeficiency Virus Infected Patients. *Arch Intern Med* 1997. **157**: 227-3.
- 134 Reis FJ, Bedran MBM, Moura JAR, Assis I, Rodrigues MESM. Six-Month Isoniazid-Rifampin Treatment for Pulmonary Tuberculosis in Children. *Am Rev Resp Dis* 1990; **142**: 1–4.
- 135 Rosser A, Richardson M, Wiselka MJ, *et al*. A nested case-control study of predictors for tuberculosis recurrence in a large UK Centre. *BMC Infect Dis* 2018; **18**: 94.
- 136 Schirotti C, Carugati M, Zanini F, *et al*. Exogenous reinfection of tuberculosis in a low-burden area. *Infection* 2015; **43**: 647–53.
- 137 Schwœbel V, Trébucq A, Kashongwe Z, *et al*. Outcomes of a nine-month regimen for rifampicin-resistant tuberculosis up to 24 months after treatment completion in nine African countries. *EClinicalMedicine* 2020;**20**:100268. doi:10.1016/j.eclinm.2020.100268
- 138 Seon HJ, Kim YI, Lim SC, Kim YH, Kwon YS. Clinical significance of residual lesions in chest computed tomography after anti-tuberculosis treatment. *Int J Tuberc Lung Dis* 2014; **18**: 341–6.
- 139 Shamputa IC, Van Deun A, Salim MAH, *et al*. Endogenous reactivation and true treatment failure as causes of recurrent tuberculosis in a high incidence setting with a low HIV infection. *Trop Med Int Health* 2007; **12**: 700–8.
- 140 Shen G, Xue Z, Shen X, Gui X, Shen M, Mei J. Tuberculosis and Exogenous. *Emerg Infect Dis* 2006; **12**: 11–3.
- 141 Shen X, Yang C, Wu J, *et al*. Recurrent tuberculosis in an urban area in China: Relapse or exogenous reinfection? *Tuberculosis* 2017; **103**: 97–104.
- 142 Shin SS, Furin JJ, Alcantara F, *et al*. Long-term follow-up for multidrug-resistant tuberculosis. *Emerg Infect Dis* 2006; **12**: 687–8.
- 143 Slutkin G, Schechter GF, Hopewell PC. The results of 9-month isoniazid-rifampin therapy for pulmonary tuberculosis under program conditions in San Francisco. *Am Rev Respir Dis* 1988;**138**:1622–4. doi:10.1164/ajrccm/138.6.1622
- 144 Snider DE, Graczyk J, Bek E, Rogowski J. Supervised six-months treatment of newly diagnosed pulmonary tuberculosis using isoniazid, rifampin, and

- pyrazinamide with and without streptomycin. *Am Rev Respir Dis* 1984; **130**: 1091–4.
- 145 Somner AR. Short-course chemotherapy in pulmonary tuberculosis. A controlled trial by the British Thoracic Association (third report). *Lancet* 1980; **1**: 1182–3.
- 146 Sonnenberg P, Murray J, Glynn JR, Shearer S, Kambashi B, Godfrey-Faussett P. HIV-1 and recurrence, relapse, and reinfection of tuberculosis after cure: a cohort study in South African mineworkers. *Lancet* 2001; **358**: 1687–93.
- 147 Spagnolo S V, Raver JM. Nine-month chemotherapy for pulmonary tuberculosis. *South Med J* 1982; **75**: 134-137,142.
- 148 Su WJ, Perng RP. Fixed-dose combination chemotherapy (Rifater/Rifinah) for active pulmonary tuberculosis in Taiwan: a two-year follow-up. *Int J Tuberc Lung Dis* 2002; **6**: 1029–32.
- 149 Sun Y, Harley D, Vally H, Sleight A. Impact of Multidrug Resistance on Tuberculosis Recurrence and Long-Term Outcome in China. *PLoS One* 2017; **12**: e0168865.
- 150 Suryanto AA, van den Broek J, Hatta M, de Soldenhoff R, van der Werf MJ. Is there an increased risk of TB relapse in patients treated with fixed-dose combination drugs in Indonesia? *Int J Tuberc Lung Dis* 2008; **12**: 174–9.
- 151 Swaminathan S, Rajasekaran S, Venkatesan P, Kamakoti K, Trust C, Padmapriyadarsini C. Long term follow up of HIV-infected patients with tuberculosis treated with 6-month intermittent short course chemotherapy. *Natl Med India* 2007; **21**: 3-8
- 152 Tam CM, Chan SL, Kam KM, *et al.* Rifapentine and isoniazid in the continuation phase of a 6-month regimen. Final report at 5 years: prognostic value of various measures. *Int J Tuberc Lung Dis* 2002; **6**: 3–10.
- 153 Teo SK. Assessment of a combined preparation of isoniazid, rifampicin and pyrazinamide (Rifater) in the initial phase of chemotherapy in three 6-month regimens for smear-positive pulmonary tuberculosis: a five-year follow-up report. *Int J Tuberc Lung Dis* 1999;**3**:126–32.NS -
- 154 Thomas A, Gopi PG, Santha T, *et al.* Predictors of relapse among pulmonary tuberculosis patients treated in a DOTS programme in South India. *Int J Tuberc Lung Dis* 2005; **9**: 556–61.
- 155 Thomas BE, Thiruvengadam K, S R, *et al.* Smoking, alcohol use disorder and tuberculosis treatment outcomes: A dual co-morbidity burden that cannot be ignored. *PLoS One* 2019; **14**: e0220507.

- 156 Umubyeyi AN, Shamputa IC, Rigouts L, *et al.* Molecular investigation of recurrent tuberculosis in patients from Rwanda. *Int J Tuberc Lung Dis* 2007; **11**: 860–7.
- 157 Van Deun A, Aung KJ, Salim MA, *et al.* Extension of the intensive phase reduces unfavourable outcomes with the 8-month thioacetazone regimen. *Int J Tuberc Lung Dis* 2006; **10**: 1255–61.
- 158 Van Deun A, Maug AKJ, Salim MAH, *et al.* Short, highly effective, and inexpensive standardized treatment of multidrug-resistant tuberculosis. *Am J Respir Crit Care Med* 2010; **182**:684–92. doi:10.1164/rccm.201001-0077OC
- 159 Van Deun A, Salim MA, Das PK, Bastian I, Portaels F. Results of a standardised regimen for multidrug-resistant tuberculosis in Bangladesh. *Int J Tuberc Lung Dis* 2004; **8**: 560–7.
- 160 van Rie A, Warren R, Richardson M, *et al.* Exogenous reinfection as a cause of recurrent tuberculosis after curative treatment. *N Engl J Med* 1999; **341**: 1174–9.
- 161 Velayutham B, Chadha VK, Singla N, *et al.* Recurrence of tuberculosis among newly diagnosed sputum positive pulmonary tuberculosis patients treated under the Revised National Tuberculosis Control Programme, India: A multi-centric prospective study. *PLoS One* 2018; **13**: e0200150.
- 162 Velayutham B, Jawahar MS, Nair D, *et al.* 4-month moxifloxacin containing regimens in the treatment of patients with sputum-positive pulmonary tuberculosis in South India - a randomised clinical trial. *Trop Med Int Health* 2020; **25**:483–95. doi:10.1111/tmi.13371
- 163 Vieira AA, Leite DT, Adreoni S. Tuberculosis recurrence in a priority city in the state of Sao Paulo, Brazil. *J Bras Pneumol* 2017; **43**: 106–12.
- 164 Vree M, Huong NT, Duong BD, *et al.* Survival and relapse rate of tuberculosis patients who successfully completed treatment in Vietnam. *Int J Tuberc Lung Dis* 2007; **11**: 392–7.
- 165 Wang J-Y, Sun H-Y, Wang J-T, *et al.* Nine- to Twelve-Month Anti-Tuberculosis Treatment Is Associated with a Lower Recurrence Rate than 6-9-Month Treatment in Human Immunodeficiency Virus-Infected Patients: A Retrospective Population-Based Cohort Study in Taiwan. *PLoS One* 2015; **10**: e0144136.
- 166 Westerlund EE, Tovar MA, Lonnermark E, Montoya R, Evans CA. Tuberculosis-related knowledge is associated with patient outcomes in shantytown residents; results from a cohort study, Peru. *J Infect* 2015; **71**: 347–57.

- 167 Wu J-T, Chiu C-T, Wei Y-F, Lai Y-F. Comparison of the safety and efficacy of a fixed-dose combination regimen and separate formulations for pulmonary tuberculosis treatment. *Clinics (Sao Paulo)* 2015; **70**: 429–34.
- 168 Wu Z, Guo J, Huang Y, Cai E, Zhang X, Pan Q. Journal of Diabetes and Its Complications Diabetes mellitus in patients with pulmonary tuberculosis in an aging population in Shanghai , China : Prevalence , clinical characteristics and outcomes. *J Diabetes Complications* 2015; **30**: 237-41
- 169 Xia Y, Goel S, Harries AD, *et al.* Prevalence of extended treatment in pulmonary tuberculosis patients receiving first-line therapy and its association with recurrent tuberculosis in Beijing, China. *Trans R Soc Trop Med Hyg* 2014; **108**: 402–7.
- 170 Yan L, Kan X, Zhu L, *et al.* Short-course Regimen for Subsequent Treatment of Pulmonary Tuberculosis: A Prospective, Randomized, Controlled Multicenter Clinical Trial in China. *Clin Ther* 2018; **40**: 440–9.
- 171 Yen Y-F, Yen M-Y, Lin Y-S, *et al.* Smoking increases risk of recurrence after successful anti-tuberculosis treatment: a population-based study. *Int J Tuberc Lung Dis* 2014; **18**: 492–8.
- 172 Yoshiyama T, Morimoto K, Okumura M, *et al.* Long term outcome of multidrug-resistant TB patients in Fukujuji Hospital in Japan. *Trans R Soc Trop Med Hyg* 2014; **108**: 589–90.
- 173 Yoshiyama T, Shrestha B, Maharjan B. Risk of relapse and failure after retreatment with the Category II regimen in Nepal. *Int J Tuberc Lung Dis* 2010; **14**: 1418–23.
- 174 Zhdanov V, Bilenko N, Mor Z. Risk Factors for Recurrent Tuberculosis among Successfully Treated Patients in Israel, 1999 – 2011. *Isr Med Assoc J* 2017; **19**: 237-41
- 175 Zheng X-B, Diwan VK, Zhao Q, *et al.* Treatment quality and outcome for multidrug-resistant tuberculosis patients in four regions of China: a cohort study. *Infect Dis poverty* 2020;**9**:97. doi:10.1186/s40249-020-00719-x
- 176 Zierski M, Bek E, Long MW, Snider DEJ. Short-course (6-month) cooperative tuberculosis study in Poland: results 30 months after completion of treatment. *Am Rev Respir Dis* 1981; **124**: 249–51.
